# Supplementary material for: Identification of a long non-coding RNA signature for predicting prognosis and biomarkers in lung adenocarcinoma
Source: PubMed Central journal article supplement — Oncol Lett. 2020 Feb 17;19(4):2793–800. doi: 10.3892/ol.2020.11400 (PMC7068299; doi:10.3892/ol.2020.11400), 2020-02-17
Supplement: Supplementary_Data.pdf [file Supplementary_Data.pdf]

1 | Table SI. Screened raw data of 1,684 differentially expressed lncRNAs [from TCGA](#)  
 2 | [database](#).

|           | <u>lncRNA</u>     | <u>logFC</u>        | <u>P-Value</u>                | <u>FDR</u>                    |
|-----------|-------------------|---------------------|-------------------------------|-------------------------------|
| <u>1</u>  | <u>AL606469.1</u> | <u>-3.880878774</u> | <u>5.70x10<sup>-108</sup></u> | <u>6.56x10<sup>-104</sup></u> |
| <u>2</u>  | <u>LANCL1-AS1</u> | <u>-2.726603382</u> | <u>2.28x10<sup>-92</sup></u>  | <u>1.30x10<sup>-88</sup></u>  |
| <u>3</u>  | <u>HSPC324</u>    | <u>-3.054492723</u> | <u>1.46x10<sup>-90</sup></u>  | <u>5.57x10<sup>-87</sup></u>  |
| <u>4</u>  | <u>AC006273.1</u> | <u>-2.677638634</u> | <u>1.00x10<sup>-68</sup></u>  | <u>2.87x10<sup>-65</sup></u>  |
| <u>5</u>  | <u>AC011899.2</u> | <u>-2.021074438</u> | <u>4.11x10<sup>-66</sup></u>  | <u>9.38x10<sup>-63</sup></u>  |
| <u>6</u>  | <u>AC026369.3</u> | <u>-2.433859375</u> | <u>9.42x10<sup>-58</sup></u>  | <u>1.54x10<sup>-54</sup></u>  |
| <u>7</u>  | <u>AC004947.1</u> | <u>-2.623715737</u> | <u>8.94x10<sup>-58</sup></u>  | <u>1.54x10<sup>-54</sup></u>  |
| <u>8</u>  | <u>AC022558.1</u> | <u>-2.990313852</u> | <u>1.54x10<sup>-52</sup></u>  | <u>1.96x10<sup>-49</sup></u>  |
| <u>9</u>  | <u>AC135012.3</u> | <u>-4.163372885</u> | <u>1.46x10<sup>-52</sup></u>  | <u>1.96x10<sup>-49</sup></u>  |
| <u>10</u> | <u>MIR3945HG</u>  | <u>-3.662218348</u> | <u>3.00x10<sup>-48</sup></u>  | <u>3.43x10<sup>-45</sup></u>  |
| <u>11</u> | <u>AC104237.3</u> | <u>-3.303125281</u> | <u>2.89x10<sup>-43</sup></u>  | <u>3.00x10<sup>-40</sup></u>  |
| <u>12</u> | <u>PACRG-AS3</u>  | <u>-3.206463156</u> | <u>6.75x10<sup>-43</sup></u>  | <u>6.43x10<sup>-40</sup></u>  |
| <u>13</u> | <u>LINC02016</u>  | <u>-5.262415517</u> | <u>2.35x10<sup>-41</sup></u>  | <u>2.06x10<sup>-38</sup></u>  |
| <u>14</u> | <u>LINC02249</u>  | <u>-4.778772422</u> | <u>3.50x10<sup>-41</sup></u>  | <u>2.86x10<sup>-38</sup></u>  |
| <u>15</u> | <u>AC104984.2</u> | <u>-2.989914158</u> | <u>2.01x10<sup>-40</sup></u>  | <u>1.53x10<sup>-37</sup></u>  |
| <u>16</u> | <u>LINC01082</u>  | <u>-3.635893774</u> | <u>1.14x10<sup>-39</sup></u>  | <u>8.11x10<sup>-37</sup></u>  |
| <u>17</u> | <u>AC095050.1</u> | <u>-4.637546562</u> | <u>2.48x10<sup>-39</sup></u>  | <u>1.67x10<sup>-36</sup></u>  |
| <u>18</u> | <u>AL356489.2</u> | <u>-2.837971155</u> | <u>2.40x10<sup>-38</sup></u>  | <u>1.52x10<sup>-35</sup></u>  |
| <u>19</u> | <u>AC008966.2</u> | <u>-2.642367977</u> | <u>2.35x10<sup>-37</sup></u>  | <u>1.41x10<sup>-34</sup></u>  |
| <u>20</u> | <u>AC084030.1</u> | <u>-4.524750615</u> | <u>3.28x10<sup>-37</sup></u>  | <u>1.87x10<sup>-34</sup></u>  |
| <u>21</u> | <u>ALKBH3-AS1</u> | <u>-2.00508904</u>  | <u>4.19x10<sup>-36</sup></u>  | <u>2.28x10<sup>-33</sup></u>  |
| <u>22</u> | <u>LINC01863</u>  | <u>-3.002571282</u> | <u>2.24x10<sup>-35</sup></u>  | <u>1.16x10<sup>-32</sup></u>  |
| <u>23</u> | <u>AP002856.2</u> | <u>-3.280287922</u> | <u>5.50x10<sup>-35</sup></u>  | <u>2.73x10<sup>-32</sup></u>  |

|                    |                            |                              |                                       |                                       |
|--------------------|----------------------------|------------------------------|---------------------------------------|---------------------------------------|
| <a href="#">24</a> | <a href="#">LINC01273</a>  | <a href="#">-2.066421866</a> | <a href="#">6.96x10<sup>-35</sup></a> | <a href="#">3.31x10<sup>-32</sup></a> |
| <a href="#">25</a> | <a href="#">AL031058.1</a> | <a href="#">2.514802504</a>  | <a href="#">3.52x10<sup>-33</sup></a> | <a href="#">1.55x10<sup>-30</sup></a> |
| <a href="#">26</a> | <a href="#">CR559946.1</a> | <a href="#">-3.040516589</a> | <a href="#">4.65x10<sup>-33</sup></a> | <a href="#">1.97x10<sup>-30</sup></a> |
| <a href="#">27</a> | <a href="#">AC010776.3</a> | <a href="#">-2.625755459</a> | <a href="#">1.18x10<sup>-32</sup></a> | <a href="#">4.82x10<sup>-30</sup></a> |
| <a href="#">28</a> | <a href="#">AC141586.2</a> | <a href="#">-2.685265541</a> | <a href="#">1.26x10<sup>-32</sup></a> | <a href="#">4.96x10<sup>-30</sup></a> |
| <a href="#">29</a> | <a href="#">AL445931.1</a> | <a href="#">-3.171440534</a> | <a href="#">1.58x10<sup>-31</sup></a> | <a href="#">5.81x10<sup>-29</sup></a> |
| <a href="#">30</a> | <a href="#">AC112206.2</a> | <a href="#">-2.785586441</a> | <a href="#">7.45x10<sup>-31</sup></a> | <a href="#">2.66x10<sup>-28</sup></a> |
| <a href="#">31</a> | <a href="#">LINC00968</a>  | <a href="#">-3.408570214</a> | <a href="#">2.25x10<sup>-30</sup></a> | <a href="#">7.80x10<sup>-28</sup></a> |
| <a href="#">32</a> | <a href="#">AC239585.1</a> | <a href="#">-2.346403331</a> | <a href="#">2.40x10<sup>-30</sup></a> | <a href="#">8.07x10<sup>-28</sup></a> |
| <a href="#">33</a> | <a href="#">AL392023.2</a> | <a href="#">-2.708675571</a> | <a href="#">2.21x10<sup>-29</sup></a> | <a href="#">7.01x10<sup>-27</sup></a> |
| <a href="#">34</a> | <a href="#">AC104984.4</a> | <a href="#">-4.227056988</a> | <a href="#">2.38x10<sup>-29</sup></a> | <a href="#">7.14x10<sup>-27</sup></a> |
| <a href="#">35</a> | <a href="#">AC245100.1</a> | <a href="#">-4.31792525</a>  | <a href="#">2.37x10<sup>-29</sup></a> | <a href="#">7.14x10<sup>-27</sup></a> |
| <a href="#">36</a> | <a href="#">AL138799.2</a> | <a href="#">-3.532927093</a> | <a href="#">4.15x10<sup>-29</sup></a> | <a href="#">1.19x10<sup>-26</sup></a> |
| <a href="#">37</a> | <a href="#">AC107074.1</a> | <a href="#">-3.25349973</a>  | <a href="#">4.36x10<sup>-29</sup></a> | <a href="#">1.21x10<sup>-26</sup></a> |
| <a href="#">38</a> | <a href="#">AC016597.2</a> | <a href="#">-2.798911586</a> | <a href="#">4.93x10<sup>-29</sup></a> | <a href="#">1.34x10<sup>-26</sup></a> |
| <a href="#">39</a> | <a href="#">AL080312.2</a> | <a href="#">-2.736936565</a> | <a href="#">5.25x10<sup>-29</sup></a> | <a href="#">1.39x10<sup>-26</sup></a> |
| <a href="#">40</a> | <a href="#">RTCA-AS1</a>   | <a href="#">-2.298205058</a> | <a href="#">9.35x10<sup>-29</sup></a> | <a href="#">2.43x10<sup>-26</sup></a> |
| <a href="#">41</a> | <a href="#">AC022441.2</a> | <a href="#">-3.923167563</a> | <a href="#">2.24x10<sup>-28</sup></a> | <a href="#">5.68x10<sup>-26</sup></a> |
| <a href="#">42</a> | <a href="#">LINC00551</a>  | <a href="#">-2.582277518</a> | <a href="#">6.58x10<sup>-28</sup></a> | <a href="#">1.63x10<sup>-25</sup></a> |
| <a href="#">43</a> | <a href="#">LINC01176</a>  | <a href="#">2.297467402</a>  | <a href="#">7.71x10<sup>-28</sup></a> | <a href="#">1.87x10<sup>-25</sup></a> |
| <a href="#">44</a> | <a href="#">AC013724.1</a> | <a href="#">-3.230650449</a> | <a href="#">1.64x10<sup>-27</sup></a> | <a href="#">3.90x10<sup>-25</sup></a> |
| <a href="#">45</a> | <a href="#">Z82246.1</a>   | <a href="#">-3.689001062</a> | <a href="#">4.65x10<sup>-27</sup></a> | <a href="#">1.08x10<sup>-24</sup></a> |
| <a href="#">46</a> | <a href="#">AC091180.3</a> | <a href="#">-2.887766597</a> | <a href="#">4.94x10<sup>-27</sup></a> | <a href="#">1.13x10<sup>-24</sup></a> |
| <a href="#">47</a> | <a href="#">AC100793.4</a> | <a href="#">-2.486420489</a> | <a href="#">7.38x10<sup>-27</sup></a> | <a href="#">1.65x10<sup>-24</sup></a> |
| <a href="#">48</a> | <a href="#">AL772337.2</a> | <a href="#">-2.633921621</a> | <a href="#">1.25x10<sup>-26</sup></a> | <a href="#">2.70x10<sup>-24</sup></a> |
| <a href="#">49</a> | <a href="#">GHET1</a>      | <a href="#">2.210152073</a>  | <a href="#">4.61x10<sup>-26</sup></a> | <a href="#">9.75x10<sup>-24</sup></a> |
| <a href="#">50</a> | <a href="#">AC008870.4</a> | <a href="#">3.40718776</a>   | <a href="#">6.47x10<sup>-26</sup></a> | <a href="#">1.32x10<sup>-23</sup></a> |
| <a href="#">51</a> | <a href="#">AL445307.1</a> | <a href="#">-3.562197692</a> | <a href="#">6.62x10<sup>-26</sup></a> | <a href="#">1.33x10<sup>-23</sup></a> |

|           |                    |                     |                              |                              |
|-----------|--------------------|---------------------|------------------------------|------------------------------|
| <u>52</u> | <u>PVRL3-AS1</u>   | <u>-2.137026061</u> | <u>1.64x10<sup>-25</sup></u> | <u>3.17x10<sup>-23</sup></u> |
| <u>53</u> | <u>AC096637.1</u>  | <u>-3.409055287</u> | <u>1.86x10<sup>-25</sup></u> | <u>3.53x10<sup>-23</sup></u> |
| <u>54</u> | <u>AP001189.1</u>  | <u>-3.148489929</u> | <u>4.13x10<sup>-25</sup></u> | <u>7.74x10<sup>-23</sup></u> |
| <u>55</u> | <u>AC003958.2</u>  | <u>-2.813378003</u> | <u>8.21x10<sup>-25</sup></u> | <u>1.51x10<sup>-22</sup></u> |
| <u>56</u> | <u>AC068831.8</u>  | <u>-2.820907344</u> | <u>9.24x10<sup>-25</sup></u> | <u>1.68x10<sup>-22</sup></u> |
| <u>57</u> | <u>AC105133.1</u>  | <u>-3.648581009</u> | <u>1.11x10<sup>-24</sup></u> | <u>1.97x10<sup>-22</sup></u> |
| <u>58</u> | <u>FGF10-AS1</u>   | <u>-3.040669454</u> | <u>1.16x10<sup>-24</sup></u> | <u>2.05x10<sup>-22</sup></u> |
| <u>59</u> | <u>PVT1</u>        | <u>2.755027957</u>  | <u>2.33x10<sup>-24</sup></u> | <u>4.03x10<sup>-22</sup></u> |
| <u>60</u> | <u>AC110760.4</u>  | <u>2.833011896</u>  | <u>5.57x10<sup>-24</sup></u> | <u>9.50x10<sup>-22</sup></u> |
| <u>61</u> | <u>AC124301.2</u>  | <u>-3.600572822</u> | <u>1.08x10<sup>-23</sup></u> | <u>1.81x10<sup>-21</sup></u> |
| <u>62</u> | <u>AP000438.1</u>  | <u>-3.085662888</u> | <u>1.26x10<sup>-23</sup></u> | <u>2.08x10<sup>-21</sup></u> |
| <u>63</u> | <u>AC044810.2</u>  | <u>-3.307486758</u> | <u>2.44x10<sup>-23</sup></u> | <u>3.98x10<sup>-21</sup></u> |
| <u>64</u> | <u>GAS8-AS1</u>    | <u>-2.049384922</u> | <u>3.57x10<sup>-23</sup></u> | <u>5.74x10<sup>-21</sup></u> |
| <u>65</u> | <u>AC105219.4</u>  | <u>2.133283052</u>  | <u>4.82x10<sup>-23</sup></u> | <u>7.65x10<sup>-21</sup></u> |
| <u>66</u> | <u>LINC01556</u>   | <u>-2.30530461</u>  | <u>6.83x10<sup>-23</sup></u> | <u>1.07x10<sup>-20</sup></u> |
| <u>67</u> | <u>AL033527.3</u>  | <u>2.570598848</u>  | <u>9.36x10<sup>-23</sup></u> | <u>1.44x10<sup>-20</sup></u> |
| <u>68</u> | <u>AC010776.2</u>  | <u>-2.235412025</u> | <u>1.24x10<sup>-22</sup></u> | <u>1.90x10<sup>-20</sup></u> |
| <u>69</u> | <u>FENRR</u>       | <u>-3.91504105</u>  | <u>1.48x10<sup>-22</sup></u> | <u>2.22x10<sup>-20</sup></u> |
| <u>70</u> | <u>AC241644.3</u>  | <u>-2.862446789</u> | <u>2.49x10<sup>-22</sup></u> | <u>3.69x10<sup>-20</sup></u> |
| <u>71</u> | <u>HID1-AS1</u>    | <u>-2.746411861</u> | <u>2.81x10<sup>-22</sup></u> | <u>4.12x10<sup>-20</sup></u> |
| <u>72</u> | <u>C5orf66-AS1</u> | <u>4.775641341</u>  | <u>1.84x10<sup>-21</sup></u> | <u>2.57x10<sup>-19</sup></u> |
| <u>73</u> | <u>AC020913.1</u>  | <u>-2.368776534</u> | <u>2.83x10<sup>-21</sup></u> | <u>3.89x10<sup>-19</sup></u> |
| <u>74</u> | <u>PRR7-AS1</u>    | <u>2.73588828</u>   | <u>4.97x10<sup>-21</sup></u> | <u>6.75x10<sup>-19</sup></u> |
| <u>75</u> | <u>AC023355.1</u>  | <u>2.863040782</u>  | <u>9.70x10<sup>-21</sup></u> | <u>1.27x10<sup>-18</sup></u> |
| <u>76</u> | <u>AC013457.1</u>  | <u>-2.90838446</u>  | <u>1.24x10<sup>-20</sup></u> | <u>1.60x10<sup>-18</sup></u> |
| <u>77</u> | <u>AL136369.1</u>  | <u>-3.714890962</u> | <u>2.10x10<sup>-20</sup></u> | <u>2.64x10<sup>-18</sup></u> |
| <u>78</u> | <u>SATB2-AS1</u>   | <u>2.316514518</u>  | <u>2.54x10<sup>-20</sup></u> | <u>3.15x10<sup>-18</sup></u> |
| <u>79</u> | <u>BAALC-AS2</u>   | <u>5.489767674</u>  | <u>5.76x10<sup>-20</sup></u> | <u>7.07x10<sup>-18</sup></u> |

|                     |                            |                              |                                       |                                       |
|---------------------|----------------------------|------------------------------|---------------------------------------|---------------------------------------|
| <a href="#">80</a>  | <a href="#">AL358176.1</a> | <a href="#">-2.588054751</a> | <a href="#">1.20x10<sup>-19</sup></a> | <a href="#">1.45x10<sup>-17</sup></a> |
| <a href="#">81</a>  | <a href="#">AC079921.1</a> | <a href="#">2.691584293</a>  | <a href="#">4.07x10<sup>-19</sup></a> | <a href="#">4.79x10<sup>-17</sup></a> |
| <a href="#">82</a>  | <a href="#">AC005828.3</a> | <a href="#">-3.114724029</a> | <a href="#">6.75x10<sup>-19</sup></a> | <a href="#">7.87x10<sup>-17</sup></a> |
| <a href="#">83</a>  | <a href="#">NAV2-AS2</a>   | <a href="#">-2.614826801</a> | <a href="#">6.92x10<sup>-19</sup></a> | <a href="#">7.98x10<sup>-17</sup></a> |
| <a href="#">84</a>  | <a href="#">AC120498.4</a> | <a href="#">3.860469148</a>  | <a href="#">9.10x10<sup>-19</sup></a> | <a href="#">1.03x10<sup>-16</sup></a> |
| <a href="#">85</a>  | <a href="#">LINC01833</a>  | <a href="#">6.212299199</a>  | <a href="#">1.03x10<sup>-18</sup></a> | <a href="#">1.16x10<sup>-16</sup></a> |
| <a href="#">86</a>  | <a href="#">LINC01559</a>  | <a href="#">6.356723444</a>  | <a href="#">2.35x10<sup>-18</sup></a> | <a href="#">2.60x10<sup>-16</sup></a> |
| <a href="#">87</a>  | <a href="#">AFAP1-AS1</a>  | <a href="#">6.570451338</a>  | <a href="#">3.14x10<sup>-18</sup></a> | <a href="#">3.45x10<sup>-16</sup></a> |
| <a href="#">88</a>  | <a href="#">AP001646.3</a> | <a href="#">-2.141832921</a> | <a href="#">4.05x10<sup>-18</sup></a> | <a href="#">4.36x10<sup>-16</sup></a> |
| <a href="#">89</a>  | <a href="#">TYMSOS</a>     | <a href="#">2.609024237</a>  | <a href="#">4.33x10<sup>-18</sup></a> | <a href="#">4.62x10<sup>-16</sup></a> |
| <a href="#">90</a>  | <a href="#">AC023301.1</a> | <a href="#">4.047004534</a>  | <a href="#">4.68x10<sup>-18</sup></a> | <a href="#">4.90x10<sup>-16</sup></a> |
| <a href="#">91</a>  | <a href="#">RFPL1S</a>     | <a href="#">-2.009154531</a> | <a href="#">4.64x10<sup>-18</sup></a> | <a href="#">4.90x10<sup>-16</sup></a> |
| <a href="#">92</a>  | <a href="#">AC090502.1</a> | <a href="#">4.094439918</a>  | <a href="#">4.94x10<sup>-18</sup></a> | <a href="#">5.13x10<sup>-16</sup></a> |
| <a href="#">93</a>  | <a href="#">AC017053.1</a> | <a href="#">-2.182715727</a> | <a href="#">5.71x10<sup>-18</sup></a> | <a href="#">5.87x10<sup>-16</sup></a> |
| <a href="#">94</a>  | <a href="#">AC090796.1</a> | <a href="#">-3.220489439</a> | <a href="#">7.57x10<sup>-18</sup></a> | <a href="#">7.71x10<sup>-16</sup></a> |
| <a href="#">95</a>  | <a href="#">AL049874.3</a> | <a href="#">4.608901511</a>  | <a href="#">9.28x10<sup>-18</sup></a> | <a href="#">9.37x10<sup>-16</sup></a> |
| <a href="#">96</a>  | <a href="#">LINP1</a>      | <a href="#">4.338733906</a>  | <a href="#">1.02x10<sup>-17</sup></a> | <a href="#">1.02x10<sup>-15</sup></a> |
| <a href="#">97</a>  | <a href="#">AL772337.1</a> | <a href="#">-2.574387065</a> | <a href="#">1.15x10<sup>-17</sup></a> | <a href="#">1.13x10<sup>-15</sup></a> |
| <a href="#">98</a>  | <a href="#">LINC00862</a>  | <a href="#">3.490207213</a>  | <a href="#">1.32x10<sup>-17</sup></a> | <a href="#">1.29x10<sup>-15</sup></a> |
| <a href="#">99</a>  | <a href="#">AC244035.2</a> | <a href="#">-2.27251186</a>  | <a href="#">1.36x10<sup>-17</sup></a> | <a href="#">1.32x10<sup>-15</sup></a> |
| <a href="#">100</a> | <a href="#">LINC00461</a>  | <a href="#">3.25649732</a>   | <a href="#">1.81x10<sup>-17</sup></a> | <a href="#">1.74x10<sup>-15</sup></a> |
| <a href="#">101</a> | <a href="#">AC135178.4</a> | <a href="#">-2.876173745</a> | <a href="#">1.88x10<sup>-17</sup></a> | <a href="#">1.79x10<sup>-15</sup></a> |
| <a href="#">102</a> | <a href="#">AL358115.1</a> | <a href="#">2.277338966</a>  | <a href="#">1.97x10<sup>-17</sup></a> | <a href="#">1.85x10<sup>-15</sup></a> |
| <a href="#">103</a> | <a href="#">AP003469.2</a> | <a href="#">2.303224063</a>  | <a href="#">3.51x10<sup>-17</sup></a> | <a href="#">3.22x10<sup>-15</sup></a> |
| <a href="#">104</a> | <a href="#">LINC00412</a>  | <a href="#">-2.397350088</a> | <a href="#">3.49x10<sup>-17</sup></a> | <a href="#">3.22x10<sup>-15</sup></a> |
| <a href="#">105</a> | <a href="#">AL513123.1</a> | <a href="#">4.728002075</a>  | <a href="#">3.75x10<sup>-17</sup></a> | <a href="#">3.37x10<sup>-15</sup></a> |
| <a href="#">106</a> | <a href="#">OTX2-AS1</a>   | <a href="#">6.123363598</a>  | <a href="#">3.91x10<sup>-17</sup></a> | <a href="#">3.49x10<sup>-15</sup></a> |
| <a href="#">107</a> | <a href="#">AL662797.1</a> | <a href="#">-3.445975212</a> | <a href="#">4.27x10<sup>-17</sup></a> | <a href="#">3.78x10<sup>-15</sup></a> |

|                     |                            |                              |                                       |                                       |
|---------------------|----------------------------|------------------------------|---------------------------------------|---------------------------------------|
| <a href="#">108</a> | <a href="#">CASC11</a>     | <a href="#">2.947035492</a>  | <a href="#">7.94x10<sup>-17</sup></a> | <a href="#">6.87x10<sup>-15</sup></a> |
| <a href="#">109</a> | <a href="#">AL109754.1</a> | <a href="#">-3.09349043</a>  | <a href="#">1.40x10<sup>-16</sup></a> | <a href="#">1.18x10<sup>-14</sup></a> |
| <a href="#">110</a> | <a href="#">AL121987.1</a> | <a href="#">6.707516034</a>  | <a href="#">1.66x10<sup>-16</sup></a> | <a href="#">1.37x10<sup>-14</sup></a> |
| <a href="#">111</a> | <a href="#">AL590723.1</a> | <a href="#">4.468996544</a>  | <a href="#">1.65x10<sup>-16</sup></a> | <a href="#">1.37x10<sup>-14</sup></a> |
| <a href="#">112</a> | <a href="#">AC092301.1</a> | <a href="#">-2.148798714</a> | <a href="#">1.92x10<sup>-16</sup></a> | <a href="#">1.58x10<sup>-14</sup></a> |
| <a href="#">113</a> | <a href="#">LINC02428</a>  | <a href="#">4.001013237</a>  | <a href="#">2.10x10<sup>-16</sup></a> | <a href="#">1.71x10<sup>-14</sup></a> |
| <a href="#">114</a> | <a href="#">LINC01977</a>  | <a href="#">4.815851664</a>  | <a href="#">2.19x10<sup>-16</sup></a> | <a href="#">1.77x10<sup>-14</sup></a> |
| <a href="#">115</a> | <a href="#">LINC01572</a>  | <a href="#">-2.076974191</a> | <a href="#">2.26x10<sup>-16</sup></a> | <a href="#">1.82x10<sup>-14</sup></a> |
| <a href="#">116</a> | <a href="#">AP003500.1</a> | <a href="#">3.508583888</a>  | <a href="#">4.79x10<sup>-16</sup></a> | <a href="#">3.77x10<sup>-14</sup></a> |
| <a href="#">117</a> | <a href="#">AC027288.3</a> | <a href="#">-2.941477425</a> | <a href="#">4.97x10<sup>-16</sup></a> | <a href="#">3.88x10<sup>-14</sup></a> |
| <a href="#">118</a> | <a href="#">U62317.1</a>   | <a href="#">3.690246809</a>  | <a href="#">5.62x10<sup>-16</sup></a> | <a href="#">4.34x10<sup>-14</sup></a> |
| <a href="#">119</a> | <a href="#">AL355989.1</a> | <a href="#">-2.921564103</a> | <a href="#">6.38x10<sup>-16</sup></a> | <a href="#">4.89x10<sup>-14</sup></a> |
| <a href="#">120</a> | <a href="#">MGC27382</a>   | <a href="#">-3.210224857</a> | <a href="#">9.04x10<sup>-16</sup></a> | <a href="#">6.75x10<sup>-14</sup></a> |
| <a href="#">121</a> | <a href="#">AL591686.1</a> | <a href="#">-3.116477358</a> | <a href="#">9.83x10<sup>-16</sup></a> | <a href="#">7.25x10<sup>-14</sup></a> |
| <a href="#">122</a> | <a href="#">Z98257.1</a>   | <a href="#">7.018780308</a>  | <a href="#">1.02x10<sup>-15</sup></a> | <a href="#">7.44x10<sup>-14</sup></a> |
| <a href="#">123</a> | <a href="#">AP002498.1</a> | <a href="#">3.644865592</a>  | <a href="#">1.02x10<sup>-15</sup></a> | <a href="#">7.44x10<sup>-14</sup></a> |
| <a href="#">124</a> | <a href="#">AP001189.3</a> | <a href="#">-2.466163903</a> | <a href="#">1.09x10<sup>-15</sup></a> | <a href="#">7.88x10<sup>-14</sup></a> |
| <a href="#">125</a> | <a href="#">AC022509.2</a> | <a href="#">-2.275990714</a> | <a href="#">1.48x10<sup>-15</sup></a> | <a href="#">1.06x10<sup>-13</sup></a> |
| <a href="#">126</a> | <a href="#">AC010976.2</a> | <a href="#">-3.114121861</a> | <a href="#">1.63x10<sup>-15</sup></a> | <a href="#">1.16x10<sup>-13</sup></a> |
| <a href="#">127</a> | <a href="#">AC007495.2</a> | <a href="#">-2.202623439</a> | <a href="#">2.09x10<sup>-15</sup></a> | <a href="#">1.48x10<sup>-13</sup></a> |
| <a href="#">128</a> | <a href="#">AC091770.1</a> | <a href="#">4.981819084</a>  | <a href="#">2.14x10<sup>-15</sup></a> | <a href="#">1.49x10<sup>-13</sup></a> |
| <a href="#">129</a> | <a href="#">AL596330.1</a> | <a href="#">-2.171535638</a> | <a href="#">2.14x10<sup>-15</sup></a> | <a href="#">1.49x10<sup>-13</sup></a> |
| <a href="#">130</a> | <a href="#">LINC01614</a>  | <a href="#">3.527106842</a>  | <a href="#">2.29x10<sup>-15</sup></a> | <a href="#">1.57x10<sup>-13</sup></a> |
| <a href="#">131</a> | <a href="#">AC090952.1</a> | <a href="#">-2.359778401</a> | <a href="#">2.28x10<sup>-15</sup></a> | <a href="#">1.57x10<sup>-13</sup></a> |
| <a href="#">132</a> | <a href="#">AL391056.1</a> | <a href="#">4.998892165</a>  | <a href="#">2.70x10<sup>-15</sup></a> | <a href="#">1.82x10<sup>-13</sup></a> |
| <a href="#">133</a> | <a href="#">HOXC13-AS</a>  | <a href="#">3.851459734</a>  | <a href="#">3.37x10<sup>-15</sup></a> | <a href="#">2.25x10<sup>-13</sup></a> |
| <a href="#">134</a> | <a href="#">AC137579.1</a> | <a href="#">-2.680148773</a> | <a href="#">3.48x10<sup>-15</sup></a> | <a href="#">2.31x10<sup>-13</sup></a> |
| <a href="#">135</a> | <a href="#">AC016687.3</a> | <a href="#">6.612384549</a>  | <a href="#">3.61x10<sup>-15</sup></a> | <a href="#">2.38x10<sup>-13</sup></a> |

|                     |                             |                              |                                       |                                       |
|---------------------|-----------------------------|------------------------------|---------------------------------------|---------------------------------------|
| <a href="#">136</a> | <a href="#">PCSK6-AS1</a>   | <a href="#">5.532859409</a>  | <a href="#">3.70x10<sup>-15</sup></a> | <a href="#">2.43x10<sup>-13</sup></a> |
| <a href="#">137</a> | <a href="#">LINC02054</a>   | <a href="#">-2.506164286</a> | <a href="#">4.29x10<sup>-15</sup></a> | <a href="#">2.80x10<sup>-13</sup></a> |
| <a href="#">138</a> | <a href="#">LINC00922</a>   | <a href="#">3.111437109</a>  | <a href="#">4.36x10<sup>-15</sup></a> | <a href="#">2.83x10<sup>-13</sup></a> |
| <a href="#">139</a> | <a href="#">AC073389.2</a>  | <a href="#">-2.473103686</a> | <a href="#">4.42x10<sup>-15</sup></a> | <a href="#">2.85x10<sup>-13</sup></a> |
| <a href="#">140</a> | <a href="#">AF230666.2</a>  | <a href="#">3.10105237</a>   | <a href="#">4.62x10<sup>-15</sup></a> | <a href="#">2.96x10<sup>-13</sup></a> |
| <a href="#">141</a> | <a href="#">AP001107.3</a>  | <a href="#">3.624684087</a>  | <a href="#">5.04x10<sup>-15</sup></a> | <a href="#">3.22x10<sup>-13</sup></a> |
| <a href="#">142</a> | <a href="#">AL158207.2</a>  | <a href="#">4.343016956</a>  | <a href="#">5.40x10<sup>-15</sup></a> | <a href="#">3.41x10<sup>-13</sup></a> |
| <a href="#">143</a> | <a href="#">AC084864.1</a>  | <a href="#">2.881230675</a>  | <a href="#">6.59x10<sup>-15</sup></a> | <a href="#">4.11x10<sup>-13</sup></a> |
| <a href="#">144</a> | <a href="#">AL161938.1</a>  | <a href="#">4.006299327</a>  | <a href="#">8.23x10<sup>-15</sup></a> | <a href="#">5.08x10<sup>-13</sup></a> |
| <a href="#">145</a> | <a href="#">AC092447.4</a>  | <a href="#">6.101969165</a>  | <a href="#">9.21x10<sup>-15</sup></a> | <a href="#">5.66x10<sup>-13</sup></a> |
| <a href="#">146</a> | <a href="#">AL133351.2</a>  | <a href="#">7.755552474</a>  | <a href="#">9.42x10<sup>-15</sup></a> | <a href="#">5.75x10<sup>-13</sup></a> |
| <a href="#">147</a> | <a href="#">INE2</a>        | <a href="#">-2.800050266</a> | <a href="#">1.14x10<sup>-14</sup></a> | <a href="#">6.83x10<sup>-13</sup></a> |
| <a href="#">148</a> | <a href="#">AC061975.6</a>  | <a href="#">5.751913712</a>  | <a href="#">1.18x10<sup>-14</sup></a> | <a href="#">7.05x10<sup>-13</sup></a> |
| <a href="#">149</a> | <a href="#">GS1-279B7.1</a> | <a href="#">5.511865393</a>  | <a href="#">1.22x10<sup>-14</sup></a> | <a href="#">7.26x10<sup>-13</sup></a> |
| <a href="#">150</a> | <a href="#">AL365203.1</a>  | <a href="#">4.203391945</a>  | <a href="#">1.28x10<sup>-14</sup></a> | <a href="#">7.55x10<sup>-13</sup></a> |
| <a href="#">151</a> | <a href="#">AC018529.1</a>  | <a href="#">-2.723918964</a> | <a href="#">1.34x10<sup>-14</sup></a> | <a href="#">7.85x10<sup>-13</sup></a> |
| <a href="#">152</a> | <a href="#">NCF4-AS1</a>    | <a href="#">-2.425971008</a> | <a href="#">1.39x10<sup>-14</sup></a> | <a href="#">8.12x10<sup>-13</sup></a> |
| <a href="#">153</a> | <a href="#">AC010099.4</a>  | <a href="#">4.380463371</a>  | <a href="#">1.41x10<sup>-14</sup></a> | <a href="#">8.16x10<sup>-13</sup></a> |
| <a href="#">154</a> | <a href="#">AC090409.2</a>  | <a href="#">4.342897307</a>  | <a href="#">1.43x10<sup>-14</sup></a> | <a href="#">8.21x10<sup>-13</sup></a> |
| <a href="#">155</a> | <a href="#">LINC01506</a>   | <a href="#">-2.573410048</a> | <a href="#">1.43x10<sup>-14</sup></a> | <a href="#">8.21x10<sup>-13</sup></a> |
| <a href="#">156</a> | <a href="#">AC010998.1</a>  | <a href="#">-3.012855148</a> | <a href="#">1.45x10<sup>-14</sup></a> | <a href="#">8.23x10<sup>-13</sup></a> |
| <a href="#">157</a> | <a href="#">AL135960.1</a>  | <a href="#">-2.408487772</a> | <a href="#">1.58x10<sup>-14</sup></a> | <a href="#">8.91x10<sup>-13</sup></a> |
| <a href="#">158</a> | <a href="#">BX276092.9</a>  | <a href="#">-2.391200315</a> | <a href="#">1.66x10<sup>-14</sup></a> | <a href="#">9.35x10<sup>-13</sup></a> |
| <a href="#">159</a> | <a href="#">AL109741.1</a>  | <a href="#">-2.470617132</a> | <a href="#">2.02x10<sup>-14</sup></a> | <a href="#">1.12x10<sup>-12</sup></a> |
| <a href="#">160</a> | <a href="#">AL162595.1</a>  | <a href="#">2.625578986</a>  | <a href="#">2.29x10<sup>-14</sup></a> | <a href="#">1.26x10<sup>-12</sup></a> |
| <a href="#">161</a> | <a href="#">AL354719.2</a>  | <a href="#">4.517308417</a>  | <a href="#">2.37x10<sup>-14</sup></a> | <a href="#">1.30x10<sup>-12</sup></a> |
| <a href="#">162</a> | <a href="#">FOXD3-AS1</a>   | <a href="#">7.37914202</a>   | <a href="#">2.43x10<sup>-14</sup></a> | <a href="#">1.32x10<sup>-12</sup></a> |
| <a href="#">163</a> | <a href="#">LINC00460</a>   | <a href="#">4.564183569</a>  | <a href="#">2.67x10<sup>-14</sup></a> | <a href="#">1.45x10<sup>-12</sup></a> |

|                     |                               |                              |                                       |                                       |
|---------------------|-------------------------------|------------------------------|---------------------------------------|---------------------------------------|
| <a href="#">164</a> | <a href="#">AC007950.1</a>    | <a href="#">-2.275443318</a> | <a href="#">2.73x10<sup>-14</sup></a> | <a href="#">1.47x10<sup>-12</sup></a> |
| <a href="#">165</a> | <a href="#">AC020907.1</a>    | <a href="#">2.9687025</a>    | <a href="#">2.90x10<sup>-14</sup></a> | <a href="#">1.56x10<sup>-12</sup></a> |
| <a href="#">166</a> | <a href="#">AC011294.1</a>    | <a href="#">2.471417759</a>  | <a href="#">3.22x10<sup>-14</sup></a> | <a href="#">1.72x10<sup>-12</sup></a> |
| <a href="#">167</a> | <a href="#">AL157400.2</a>    | <a href="#">2.362407892</a>  | <a href="#">3.28x10<sup>-14</sup></a> | <a href="#">1.74x10<sup>-12</sup></a> |
| <a href="#">168</a> | <a href="#">AC105118.1</a>    | <a href="#">4.241384402</a>  | <a href="#">3.40x10<sup>-14</sup></a> | <a href="#">1.80x10<sup>-12</sup></a> |
| <a href="#">169</a> | <a href="#">AL136164.2</a>    | <a href="#">-2.269056458</a> | <a href="#">3.56x10<sup>-14</sup></a> | <a href="#">1.87x10<sup>-12</sup></a> |
| <a href="#">170</a> | <a href="#">MIR34AHG</a>      | <a href="#">2.063116696</a>  | <a href="#">4.44x10<sup>-14</sup></a> | <a href="#">2.30x10<sup>-12</sup></a> |
| <a href="#">171</a> | <a href="#">AC007182.1</a>    | <a href="#">-2.882232851</a> | <a href="#">4.69x10<sup>-14</sup></a> | <a href="#">2.42x10<sup>-12</sup></a> |
| <a href="#">172</a> | <a href="#">AC005224.1</a>    | <a href="#">2.547257143</a>  | <a href="#">4.99x10<sup>-14</sup></a> | <a href="#">2.57x10<sup>-12</sup></a> |
| <a href="#">173</a> | <a href="#">AC093904.4</a>    | <a href="#">3.339803518</a>  | <a href="#">5.75x10<sup>-14</sup></a> | <a href="#">2.95x10<sup>-12</sup></a> |
| <a href="#">174</a> | <a href="#">Clorf220</a>      | <a href="#">2.203715575</a>  | <a href="#">6.16x10<sup>-14</sup></a> | <a href="#">3.14x10<sup>-12</sup></a> |
| <a href="#">175</a> | <a href="#">SRGAP3-AS2</a>    | <a href="#">-2.210126838</a> | <a href="#">6.30x10<sup>-14</sup></a> | <a href="#">3.20x10<sup>-12</sup></a> |
| <a href="#">176</a> | <a href="#">AC004917.1</a>    | <a href="#">2.17353772</a>   | <a href="#">6.51x10<sup>-14</sup></a> | <a href="#">3.29x10<sup>-12</sup></a> |
| <a href="#">177</a> | <a href="#">AF131215.7</a>    | <a href="#">-2.117240671</a> | <a href="#">7.72x10<sup>-14</sup></a> | <a href="#">3.88x10<sup>-12</sup></a> |
| <a href="#">178</a> | <a href="#">LINC01518</a>     | <a href="#">5.313033815</a>  | <a href="#">7.77x10<sup>-14</sup></a> | <a href="#">3.89x10<sup>-12</sup></a> |
| <a href="#">179</a> | <a href="#">U52111.1</a>      | <a href="#">2.304674858</a>  | <a href="#">8.03x10<sup>-14</sup></a> | <a href="#">4.00x10<sup>-12</sup></a> |
| <a href="#">180</a> | <a href="#">LINC01994</a>     | <a href="#">5.327093845</a>  | <a href="#">8.17x10<sup>-14</sup></a> | <a href="#">4.06x10<sup>-12</sup></a> |
| <a href="#">181</a> | <a href="#">AP003396.5</a>    | <a href="#">-2.487228946</a> | <a href="#">8.65x10<sup>-14</sup></a> | <a href="#">4.28x10<sup>-12</sup></a> |
| <a href="#">182</a> | <a href="#">FAM83A-AS1</a>    | <a href="#">6.5159388</a>    | <a href="#">9.03x10<sup>-14</sup></a> | <a href="#">4.45x10<sup>-12</sup></a> |
| <a href="#">183</a> | <a href="#">AC008429.3</a>    | <a href="#">3.988070619</a>  | <a href="#">9.20x10<sup>-14</sup></a> | <a href="#">4.51x10<sup>-12</sup></a> |
| <a href="#">184</a> | <a href="#">PCAT19</a>        | <a href="#">-2.243088639</a> | <a href="#">1.05x10<sup>-13</sup></a> | <a href="#">5.11x10<sup>-12</sup></a> |
| <a href="#">185</a> | <a href="#">LINC01165</a>     | <a href="#">-2.295025136</a> | <a href="#">1.40x10<sup>-13</sup></a> | <a href="#">6.75x10<sup>-12</sup></a> |
| <a href="#">186</a> | <a href="#">CTD-2350J17.1</a> | <a href="#">6.090848589</a>  | <a href="#">1.55x10<sup>-13</sup></a> | <a href="#">7.39x10<sup>-12</sup></a> |
| <a href="#">187</a> | <a href="#">LINC01168</a>     | <a href="#">-2.669156431</a> | <a href="#">1.65x10<sup>-13</sup></a> | <a href="#">7.86x10<sup>-12</sup></a> |
| <a href="#">188</a> | <a href="#">AC109446.3</a>    | <a href="#">2.892497392</a>  | <a href="#">1.72x10<sup>-13</sup></a> | <a href="#">8.13x10<sup>-12</sup></a> |
| <a href="#">189</a> | <a href="#">AC099793.1</a>    | <a href="#">6.402786149</a>  | <a href="#">1.72x10<sup>-13</sup></a> | <a href="#">8.14x10<sup>-12</sup></a> |
| <a href="#">190</a> | <a href="#">AC103952.1</a>    | <a href="#">3.766609219</a>  | <a href="#">1.95x10<sup>-13</sup></a> | <a href="#">9.13x10<sup>-12</sup></a> |
| <a href="#">191</a> | <a href="#">AC026785.3</a>    | <a href="#">6.69404692</a>   | <a href="#">2.13x10<sup>-13</sup></a> | <a href="#">9.91x10<sup>-12</sup></a> |

|                     |                            |                             |                                       |                                       |
|---------------------|----------------------------|-----------------------------|---------------------------------------|---------------------------------------|
| <a href="#">192</a> | <a href="#">AC011352.3</a> | <a href="#">4.012677769</a> | <a href="#">2.13x10<sup>-13</sup></a> | <a href="#">9.91x10<sup>-12</sup></a> |
| <a href="#">193</a> | <a href="#">AL662890.2</a> | <a href="#">3.012415069</a> | <a href="#">2.22x10<sup>-13</sup></a> | <a href="#">1.03x10<sup>-11</sup></a> |
| <a href="#">194</a> | <a href="#">AC068228.2</a> | <a href="#">6.273536375</a> | <a href="#">2.34x10<sup>-13</sup></a> | <a href="#">1.08x10<sup>-11</sup></a> |
| <a href="#">195</a> | <a href="#">AC106785.2</a> | <a href="#">5.358123707</a> | <a href="#">2.42x10<sup>-13</sup></a> | <a href="#">1.11x10<sup>-11</sup></a> |
| <a href="#">196</a> | <a href="#">AL731684.1</a> | <a href="#">2.801538688</a> | <a href="#">2.47x10<sup>-13</sup></a> | <a href="#">1.13x10<sup>-11</sup></a> |
| <a href="#">197</a> | <a href="#">AL117372.1</a> | <a href="#">6.691425701</a> | <a href="#">2.88x10<sup>-13</sup></a> | <a href="#">1.30x10<sup>-11</sup></a> |
| <a href="#">198</a> | <a href="#">AC106799.2</a> | <a href="#">4.908413042</a> | <a href="#">3.22x10<sup>-13</sup></a> | <a href="#">1.45x10<sup>-11</sup></a> |
| <a href="#">199</a> | <a href="#">AC004870.2</a> | <a href="#">4.722390549</a> | <a href="#">3.40x10<sup>-13</sup></a> | <a href="#">1.49x10<sup>-11</sup></a> |
| <a href="#">200</a> | <a href="#">LINC01399</a>  | <a href="#">2.693806386</a> | <a href="#">3.40x10<sup>-13</sup></a> | <a href="#">1.49x10<sup>-11</sup></a> |
| <a href="#">201</a> | <a href="#">AC008403.3</a> | <a href="#">2.338251784</a> | <a href="#">3.40x10<sup>-13</sup></a> | <a href="#">1.49x10<sup>-11</sup></a> |
| <a href="#">202</a> | <a href="#">AC079160.1</a> | <a href="#">7.01117581</a>  | <a href="#">3.51x10<sup>-13</sup></a> | <a href="#">1.53x10<sup>-11</sup></a> |
| <a href="#">203</a> | <a href="#">AC092756.1</a> | <a href="#">2.248604544</a> | <a href="#">3.60x10<sup>-13</sup></a> | <a href="#">1.57x10<sup>-11</sup></a> |
| <a href="#">204</a> | <a href="#">AC110618.1</a> | <a href="#">2.807022861</a> | <a href="#">4.44x10<sup>-13</sup></a> | <a href="#">1.92x10<sup>-11</sup></a> |
| <a href="#">205</a> | <a href="#">AL353693.1</a> | <a href="#">4.930266294</a> | <a href="#">4.88x10<sup>-13</sup></a> | <a href="#">2.10x10<sup>-11</sup></a> |
| <a href="#">206</a> | <a href="#">AC074035.1</a> | <a href="#">3.576441483</a> | <a href="#">4.89x10<sup>-13</sup></a> | <a href="#">2.10x10<sup>-11</sup></a> |
| <a href="#">207</a> | <a href="#">AC010983.1</a> | <a href="#">4.692733291</a> | <a href="#">5.25x10<sup>-13</sup></a> | <a href="#">2.23x10<sup>-11</sup></a> |
| <a href="#">208</a> | <a href="#">LINC00706</a>  | <a href="#">3.937996182</a> | <a href="#">5.24x10<sup>-13</sup></a> | <a href="#">2.23x10<sup>-11</sup></a> |
| <a href="#">209</a> | <a href="#">AC092484.1</a> | <a href="#">5.006271111</a> | <a href="#">5.30x10<sup>-13</sup></a> | <a href="#">2.24x10<sup>-11</sup></a> |
| <a href="#">210</a> | <a href="#">AL078587.1</a> | <a href="#">2.043724644</a> | <a href="#">5.35x10<sup>-13</sup></a> | <a href="#">2.26x10<sup>-11</sup></a> |
| <a href="#">211</a> | <a href="#">AL355312.3</a> | <a href="#">2.862349852</a> | <a href="#">5.90x10<sup>-13</sup></a> | <a href="#">2.48x10<sup>-11</sup></a> |
| <a href="#">212</a> | <a href="#">AC093895.1</a> | <a href="#">2.671462825</a> | <a href="#">6.12x10<sup>-13</sup></a> | <a href="#">2.56x10<sup>-11</sup></a> |
| <a href="#">213</a> | <a href="#">AP003397.1</a> | <a href="#">5.416946439</a> | <a href="#">8.17x10<sup>-13</sup></a> | <a href="#">3.39x10<sup>-11</sup></a> |
| <a href="#">214</a> | <a href="#">AC005256.1</a> | <a href="#">7.385430906</a> | <a href="#">8.33x10<sup>-13</sup></a> | <a href="#">3.43x10<sup>-11</sup></a> |
| <a href="#">215</a> | <a href="#">THRB-AS1</a>   | <a href="#">2.735139498</a> | <a href="#">9.70x10<sup>-13</sup></a> | <a href="#">3.97x10<sup>-11</sup></a> |
| <a href="#">216</a> | <a href="#">AC011446.1</a> | <a href="#">2.377366552</a> | <a href="#">1.41x10<sup>-12</sup></a> | <a href="#">5.72x10<sup>-11</sup></a> |
| <a href="#">217</a> | <a href="#">C2orf48</a>    | <a href="#">3.092966</a>    | <a href="#">1.49x10<sup>-12</sup></a> | <a href="#">6.01x10<sup>-11</sup></a> |
| <a href="#">218</a> | <a href="#">LRRC2-AS1</a>  | <a href="#">4.595218046</a> | <a href="#">1.54x10<sup>-12</sup></a> | <a href="#">6.16x10<sup>-11</sup></a> |
| <a href="#">219</a> | <a href="#">AL591368.1</a> | <a href="#">2.188929869</a> | <a href="#">1.61x10<sup>-12</sup></a> | <a href="#">6.40x10<sup>-11</sup></a> |



|                     |                               |                              |                                       |                                       |
|---------------------|-------------------------------|------------------------------|---------------------------------------|---------------------------------------|
| <a href="#">220</a> | <a href="#">AC116337.3</a>    | <a href="#">3.458354423</a>  | <a href="#">2.17x10<sup>-12</sup></a> | <a href="#">8.53x10<sup>-11</sup></a> |
| <a href="#">221</a> | <a href="#">AC124804.1</a>    | <a href="#">5.502361399</a>  | <a href="#">2.55x10<sup>-12</sup></a> | <a href="#">9.95x10<sup>-11</sup></a> |
| <a href="#">222</a> | <a href="#">AC061975.1</a>    | <a href="#">2.686542697</a>  | <a href="#">2.83x10<sup>-12</sup></a> | <a href="#">1.10x10<sup>-10</sup></a> |
| <a href="#">223</a> | <a href="#">AC018647.1</a>    | <a href="#">-2.639680456</a> | <a href="#">2.91x10<sup>-12</sup></a> | <a href="#">1.12x10<sup>-10</sup></a> |
| <a href="#">224</a> | <a href="#">LINC02014</a>     | <a href="#">4.265406628</a>  | <a href="#">3.25x10<sup>-12</sup></a> | <a href="#">1.26x10<sup>-10</sup></a> |
| <a href="#">225</a> | <a href="#">AC051619.7</a>    | <a href="#">2.103906932</a>  | <a href="#">3.37x10<sup>-12</sup></a> | <a href="#">1.29x10<sup>-10</sup></a> |
| <a href="#">226</a> | <a href="#">AC010735.1</a>    | <a href="#">3.081133077</a>  | <a href="#">3.41x10<sup>-12</sup></a> | <a href="#">1.31x10<sup>-10</sup></a> |
| <a href="#">227</a> | <a href="#">AC109809.2</a>    | <a href="#">5.973096862</a>  | <a href="#">3.48x10<sup>-12</sup></a> | <a href="#">1.32x10<sup>-10</sup></a> |
| <a href="#">228</a> | <a href="#">LINC01395</a>     | <a href="#">2.676018211</a>  | <a href="#">3.46x10<sup>-12</sup></a> | <a href="#">1.32x10<sup>-10</sup></a> |
| <a href="#">229</a> | <a href="#">Z95114.1</a>      | <a href="#">2.53391959</a>   | <a href="#">3.74x10<sup>-12</sup></a> | <a href="#">1.42x10<sup>-10</sup></a> |
| <a href="#">230</a> | <a href="#">AC058791.1</a>    | <a href="#">2.385754011</a>  | <a href="#">3.91x10<sup>-12</sup></a> | <a href="#">1.47x10<sup>-10</sup></a> |
| <a href="#">231</a> | <a href="#">AC243830.3</a>    | <a href="#">2.231689313</a>  | <a href="#">4.04x10<sup>-12</sup></a> | <a href="#">1.51x10<sup>-10</sup></a> |
| <a href="#">232</a> | <a href="#">AL138759.1</a>    | <a href="#">4.098010833</a>  | <a href="#">4.11x10<sup>-12</sup></a> | <a href="#">1.53x10<sup>-10</sup></a> |
| <a href="#">233</a> | <a href="#">AC036101.1</a>    | <a href="#">4.298331928</a>  | <a href="#">4.27x10<sup>-12</sup></a> | <a href="#">1.58x10<sup>-10</sup></a> |
| <a href="#">234</a> | <a href="#">LINC00473</a>     | <a href="#">4.568114502</a>  | <a href="#">4.72x10<sup>-12</sup></a> | <a href="#">1.73x10<sup>-10</sup></a> |
| <a href="#">235</a> | <a href="#">LINC02313</a>     | <a href="#">4.166090054</a>  | <a href="#">4.75x10<sup>-12</sup></a> | <a href="#">1.74x10<sup>-10</sup></a> |
| <a href="#">236</a> | <a href="#">AC025434.1</a>    | <a href="#">3.014543983</a>  | <a href="#">4.87x10<sup>-12</sup></a> | <a href="#">1.78x10<sup>-10</sup></a> |
| <a href="#">237</a> | <a href="#">AP003721.1</a>    | <a href="#">2.167970505</a>  | <a href="#">5.02x10<sup>-12</sup></a> | <a href="#">1.82x10<sup>-10</sup></a> |
| <a href="#">238</a> | <a href="#">AC005304.3</a>    | <a href="#">-2.021281557</a> | <a href="#">5.00x10<sup>-12</sup></a> | <a href="#">1.82x10<sup>-10</sup></a> |
| <a href="#">239</a> | <a href="#">LINC00307</a>     | <a href="#">6.853294791</a>  | <a href="#">5.35x10<sup>-12</sup></a> | <a href="#">1.93x10<sup>-10</sup></a> |
| <a href="#">240</a> | <a href="#">BBOX1-AS1</a>     | <a href="#">6.282631748</a>  | <a href="#">5.48x10<sup>-12</sup></a> | <a href="#">1.98x10<sup>-10</sup></a> |
| <a href="#">241</a> | <a href="#">AC005993.1</a>    | <a href="#">4.610674883</a>  | <a href="#">5.57x10<sup>-12</sup></a> | <a href="#">2.00x10<sup>-10</sup></a> |
| <a href="#">242</a> | <a href="#">LINC01510</a>     | <a href="#">3.120744198</a>  | <a href="#">5.85x10<sup>-12</sup></a> | <a href="#">2.09x10<sup>-10</sup></a> |
| <a href="#">243</a> | <a href="#">LINC02332</a>     | <a href="#">5.366760085</a>  | <a href="#">5.89x10<sup>-12</sup></a> | <a href="#">2.10x10<sup>-10</sup></a> |
| <a href="#">244</a> | <a href="#">SLX1B-SULT1A4</a> | <a href="#">3.274773156</a>  | <a href="#">6.36x10<sup>-12</sup></a> | <a href="#">2.26x10<sup>-10</sup></a> |
| <a href="#">245</a> | <a href="#">LINC02353</a>     | <a href="#">5.202871953</a>  | <a href="#">6.47x10<sup>-12</sup></a> | <a href="#">2.29x10<sup>-10</sup></a> |
| <a href="#">246</a> | <a href="#">AC138904.1</a>    | <a href="#">3.144456105</a>  | <a href="#">6.62x10<sup>-12</sup></a> | <a href="#">2.32x10<sup>-10</sup></a> |
| <a href="#">247</a> | <a href="#">AC026355.2</a>    | <a href="#">3.92958716</a>   | <a href="#">6.97x10<sup>-12</sup></a> | <a href="#">2.43x10<sup>-10</sup></a> |

|                     |                                  |                              |                                       |                                       |
|---------------------|----------------------------------|------------------------------|---------------------------------------|---------------------------------------|
| <a href="#">248</a> | <a href="#">AL096828.1</a>       | <a href="#">-2.136954476</a> | <a href="#">7.32x10<sup>-12</sup></a> | <a href="#">2.54x10<sup>-10</sup></a> |
| <a href="#">249</a> | <a href="#">AC125608.1</a>       | <a href="#">3.813180463</a>  | <a href="#">8.04x10<sup>-12</sup></a> | <a href="#">2.77x10<sup>-10</sup></a> |
| <a href="#">250</a> | <a href="#">LINC01993</a>        | <a href="#">2.97415822</a>   | <a href="#">8.12x10<sup>-12</sup></a> | <a href="#">2.78x10<sup>-10</sup></a> |
| <a href="#">251</a> | <a href="#">AC093904.2</a>       | <a href="#">2.273400949</a>  | <a href="#">8.08x10<sup>-12</sup></a> | <a href="#">2.78x10<sup>-10</sup></a> |
| <a href="#">252</a> | <a href="#">LINC00896</a>        | <a href="#">3.540037278</a>  | <a href="#">8.21x10<sup>-12</sup></a> | <a href="#">2.81x10<sup>-10</sup></a> |
| <a href="#">253</a> | <a href="#">AC108025.2</a>       | <a href="#">3.980298642</a>  | <a href="#">8.30x10<sup>-12</sup></a> | <a href="#">2.83x10<sup>-10</sup></a> |
| <a href="#">254</a> | <a href="#">LINC02473</a>        | <a href="#">4.124351095</a>  | <a href="#">9.18x10<sup>-12</sup></a> | <a href="#">3.08x10<sup>-10</sup></a> |
| <a href="#">255</a> | <a href="#">AL138760.1</a>       | <a href="#">3.337263545</a>  | <a href="#">9.21x10<sup>-12</sup></a> | <a href="#">3.08x10<sup>-10</sup></a> |
| <a href="#">256</a> | <a href="#">LINC01611</a>        | <a href="#">5.898682487</a>  | <a href="#">9.83x10<sup>-12</sup></a> | <a href="#">3.27x10<sup>-10</sup></a> |
| <a href="#">257</a> | <a href="#">LINC01234</a>        | <a href="#">6.65935268</a>   | <a href="#">1.04x10<sup>-11</sup></a> | <a href="#">3.43x10<sup>-10</sup></a> |
| <a href="#">258</a> | <a href="#">AL035409.1</a>       | <a href="#">-2.382691862</a> | <a href="#">1.04x10<sup>-11</sup></a> | <a href="#">3.44x10<sup>-10</sup></a> |
| <a href="#">259</a> | <a href="#">TLX1NB</a>           | <a href="#">3.297141668</a>  | <a href="#">1.07x10<sup>-11</sup></a> | <a href="#">3.51x10<sup>-10</sup></a> |
| <a href="#">260</a> | <a href="#">AC099313.1</a>       | <a href="#">3.602036445</a>  | <a href="#">1.10x10<sup>-11</sup></a> | <a href="#">3.59x10<sup>-10</sup></a> |
| <a href="#">261</a> | <a href="#">LINC00682</a>        | <a href="#">3.593504383</a>  | <a href="#">1.10x10<sup>-11</sup></a> | <a href="#">3.59x10<sup>-10</sup></a> |
| <a href="#">262</a> | <a href="#">TBC1D3P1-DHX40P1</a> | <a href="#">3.835229785</a>  | <a href="#">1.23x10<sup>-11</sup></a> | <a href="#">3.98x10<sup>-10</sup></a> |
| <a href="#">263</a> | <a href="#">TRERNA1</a>          | <a href="#">2.963972566</a>  | <a href="#">1.23x10<sup>-11</sup></a> | <a href="#">3.98x10<sup>-10</sup></a> |
| <a href="#">264</a> | <a href="#">LINC02431</a>        | <a href="#">3.556654267</a>  | <a href="#">1.38x10<sup>-11</sup></a> | <a href="#">4.42x10<sup>-10</sup></a> |
| <a href="#">265</a> | <a href="#">KIF25-AS1</a>        | <a href="#">3.526419973</a>  | <a href="#">1.39x10<sup>-11</sup></a> | <a href="#">4.43x10<sup>-10</sup></a> |
| <a href="#">266</a> | <a href="#">SMIM25</a>           | <a href="#">-2.553531994</a> | <a href="#">1.42x10<sup>-11</sup></a> | <a href="#">4.49x10<sup>-10</sup></a> |
| <a href="#">267</a> | <a href="#">AC105914.2</a>       | <a href="#">-2.848998521</a> | <a href="#">1.44x10<sup>-11</sup></a> | <a href="#">4.55x10<sup>-10</sup></a> |
| <a href="#">268</a> | <a href="#">BEAN1-AS1</a>        | <a href="#">2.096269999</a>  | <a href="#">1.46x10<sup>-11</sup></a> | <a href="#">4.61x10<sup>-10</sup></a> |
| <a href="#">269</a> | <a href="#">AL138789.1</a>       | <a href="#">6.074660546</a>  | <a href="#">1.50x10<sup>-11</sup></a> | <a href="#">4.71x10<sup>-10</sup></a> |
| <a href="#">270</a> | <a href="#">AL139023.1</a>       | <a href="#">2.863629022</a>  | <a href="#">1.53x10<sup>-11</sup></a> | <a href="#">4.81x10<sup>-10</sup></a> |
| <a href="#">271</a> | <a href="#">LINC01324</a>        | <a href="#">4.84836139</a>   | <a href="#">1.64x10<sup>-11</sup></a> | <a href="#">5.13x10<sup>-10</sup></a> |
| <a href="#">272</a> | <a href="#">AC005609.2</a>       | <a href="#">-2.42130873</a>  | <a href="#">1.87x10<sup>-11</sup></a> | <a href="#">5.81x10<sup>-10</sup></a> |
| <a href="#">273</a> | <a href="#">BX072579.1</a>       | <a href="#">2.853519227</a>  | <a href="#">1.91x10<sup>-11</sup></a> | <a href="#">5.90x10<sup>-10</sup></a> |
| <a href="#">274</a> | <a href="#">AL133370.1</a>       | <a href="#">5.432389751</a>  | <a href="#">1.92x10<sup>-11</sup></a> | <a href="#">5.91x10<sup>-10</sup></a> |
| <a href="#">275</a> | <a href="#">AC011442.1</a>       | <a href="#">-2.066141097</a> | <a href="#">2.15x10<sup>-11</sup></a> | <a href="#">6.57x10<sup>-10</sup></a> |

|                     |                            |                              |                                       |                                       |
|---------------------|----------------------------|------------------------------|---------------------------------------|---------------------------------------|
| <a href="#">276</a> | <a href="#">LINC02404</a>  | <a href="#">5.005215152</a>  | <a href="#">2.27x10<sup>-11</sup></a> | <a href="#">6.92x10<sup>-10</sup></a> |
| <a href="#">277</a> | <a href="#">AL359382.1</a> | <a href="#">4.398573173</a>  | <a href="#">2.39x10<sup>-11</sup></a> | <a href="#">7.25x10<sup>-10</sup></a> |
| <a href="#">278</a> | <a href="#">AC063949.2</a> | <a href="#">8.295777377</a>  | <a href="#">2.43x10<sup>-11</sup></a> | <a href="#">7.33x10<sup>-10</sup></a> |
| <a href="#">279</a> | <a href="#">AC007128.1</a> | <a href="#">5.833652033</a>  | <a href="#">2.66x10<sup>-11</sup></a> | <a href="#">7.99x10<sup>-10</sup></a> |
| <a href="#">280</a> | <a href="#">ZNF571-AS1</a> | <a href="#">2.781611284</a>  | <a href="#">2.79x10<sup>-11</sup></a> | <a href="#">8.31x10<sup>-10</sup></a> |
| <a href="#">281</a> | <a href="#">AC022784.3</a> | <a href="#">2.923470518</a>  | <a href="#">2.83x10<sup>-11</sup></a> | <a href="#">8.40x10<sup>-10</sup></a> |
| <a href="#">282</a> | <a href="#">AC092849.2</a> | <a href="#">3.502627552</a>  | <a href="#">3.01x10<sup>-11</sup></a> | <a href="#">8.86x10<sup>-10</sup></a> |
| <a href="#">283</a> | <a href="#">AC092691.1</a> | <a href="#">-2.814216796</a> | <a href="#">3.10x10<sup>-11</sup></a> | <a href="#">9.09x10<sup>-10</sup></a> |
| <a href="#">284</a> | <a href="#">AC051619.6</a> | <a href="#">5.94478081</a>   | <a href="#">3.11x10<sup>-11</sup></a> | <a href="#">9.11x10<sup>-10</sup></a> |
| <a href="#">285</a> | <a href="#">LINC00942</a>  | <a href="#">6.775713846</a>  | <a href="#">3.12x10<sup>-11</sup></a> | <a href="#">9.12x10<sup>-10</sup></a> |
| <a href="#">286</a> | <a href="#">AC076968.1</a> | <a href="#">3.663689755</a>  | <a href="#">3.22x10<sup>-11</sup></a> | <a href="#">9.38x10<sup>-10</sup></a> |
| <a href="#">287</a> | <a href="#">AL022313.2</a> | <a href="#">3.574456276</a>  | <a href="#">3.32x10<sup>-11</sup></a> | <a href="#">9.62x10<sup>-10</sup></a> |
| <a href="#">288</a> | <a href="#">LINC02133</a>  | <a href="#">5.103134832</a>  | <a href="#">3.38x10<sup>-11</sup></a> | <a href="#">9.73x10<sup>-10</sup></a> |
| <a href="#">289</a> | <a href="#">AC019193.2</a> | <a href="#">-2.254400848</a> | <a href="#">3.38x10<sup>-11</sup></a> | <a href="#">9.73x10<sup>-10</sup></a> |
| <a href="#">290</a> | <a href="#">LINC00858</a>  | <a href="#">6.094257834</a>  | <a href="#">3.61x10<sup>-11</sup></a> | <a href="#">1.03x10<sup>-09</sup></a> |
| <a href="#">291</a> | <a href="#">AL354707.1</a> | <a href="#">3.084090438</a>  | <a href="#">3.61x10<sup>-11</sup></a> | <a href="#">1.03x10<sup>-09</sup></a> |
| <a href="#">292</a> | <a href="#">FRGCA</a>      | <a href="#">3.781258821</a>  | <a href="#">3.67x10<sup>-11</sup></a> | <a href="#">1.05x10<sup>-09</sup></a> |
| <a href="#">293</a> | <a href="#">AF127577.3</a> | <a href="#">7.760214852</a>  | <a href="#">3.89x10<sup>-11</sup></a> | <a href="#">1.10x10<sup>-09</sup></a> |
| <a href="#">294</a> | <a href="#">AL354993.2</a> | <a href="#">2.632668561</a>  | <a href="#">3.92x10<sup>-11</sup></a> | <a href="#">1.11x10<sup>-09</sup></a> |
| <a href="#">295</a> | <a href="#">AC010185.1</a> | <a href="#">2.791742973</a>  | <a href="#">3.98x10<sup>-11</sup></a> | <a href="#">1.12x10<sup>-09</sup></a> |
| <a href="#">296</a> | <a href="#">LINC02052</a>  | <a href="#">7.211374406</a>  | <a href="#">4.03x10<sup>-11</sup></a> | <a href="#">1.13x10<sup>-09</sup></a> |
| <a href="#">297</a> | <a href="#">AC090220.1</a> | <a href="#">4.170767703</a>  | <a href="#">4.10x10<sup>-11</sup></a> | <a href="#">1.15x10<sup>-09</sup></a> |
| <a href="#">298</a> | <a href="#">AP001107.2</a> | <a href="#">3.50524452</a>   | <a href="#">4.33x10<sup>-11</sup></a> | <a href="#">1.20x10<sup>-09</sup></a> |
| <a href="#">299</a> | <a href="#">AL365199.1</a> | <a href="#">-2.098050537</a> | <a href="#">4.33x10<sup>-11</sup></a> | <a href="#">1.20x10<sup>-09</sup></a> |
| <a href="#">300</a> | <a href="#">AP002957.1</a> | <a href="#">4.893258291</a>  | <a href="#">4.45x10<sup>-11</sup></a> | <a href="#">1.23x10<sup>-09</sup></a> |
| <a href="#">301</a> | <a href="#">LINC02063</a>  | <a href="#">6.956667942</a>  | <a href="#">5.06x10<sup>-11</sup></a> | <a href="#">1.38x10<sup>-09</sup></a> |
| <a href="#">302</a> | <a href="#">LINC01385</a>  | <a href="#">4.454006239</a>  | <a href="#">5.41x10<sup>-11</sup></a> | <a href="#">1.47x10<sup>-09</sup></a> |
| <a href="#">303</a> | <a href="#">AC069113.2</a> | <a href="#">-2.30804664</a>  | <a href="#">5.53x10<sup>-11</sup></a> | <a href="#">1.50x10<sup>-09</sup></a> |

|                     |                            |                              |                                       |                                       |
|---------------------|----------------------------|------------------------------|---------------------------------------|---------------------------------------|
| <a href="#">304</a> | <a href="#">AL365181.2</a> | <a href="#">2.397200968</a>  | <a href="#">5.73x10<sup>-11</sup></a> | <a href="#">1.55x10<sup>-09</sup></a> |
| <a href="#">305</a> | <a href="#">LINC02466</a>  | <a href="#">4.965647244</a>  | <a href="#">5.97x10<sup>-11</sup></a> | <a href="#">1.61x10<sup>-09</sup></a> |
| <a href="#">306</a> | <a href="#">AC009262.1</a> | <a href="#">5.164482721</a>  | <a href="#">6.62x10<sup>-11</sup></a> | <a href="#">1.78x10<sup>-09</sup></a> |
| <a href="#">307</a> | <a href="#">AL117329.1</a> | <a href="#">6.947297832</a>  | <a href="#">7.03x10<sup>-11</sup></a> | <a href="#">1.88x10<sup>-09</sup></a> |
| <a href="#">308</a> | <a href="#">AP002759.1</a> | <a href="#">4.9973688</a>    | <a href="#">7.30x10<sup>-11</sup></a> | <a href="#">1.94x10<sup>-09</sup></a> |
| <a href="#">309</a> | <a href="#">AC008592.4</a> | <a href="#">-2.018392959</a> | <a href="#">7.29x10<sup>-11</sup></a> | <a href="#">1.94x10<sup>-09</sup></a> |
| <a href="#">310</a> | <a href="#">AC005695.2</a> | <a href="#">3.073376262</a>  | <a href="#">7.50x10<sup>-11</sup></a> | <a href="#">1.99x10<sup>-09</sup></a> |
| <a href="#">311</a> | <a href="#">HAGLROS</a>    | <a href="#">2.50114048</a>   | <a href="#">8.10x10<sup>-11</sup></a> | <a href="#">2.15x10<sup>-09</sup></a> |
| <a href="#">312</a> | <a href="#">AL352955.1</a> | <a href="#">6.126188994</a>  | <a href="#">8.22x10<sup>-11</sup></a> | <a href="#">2.17x10<sup>-09</sup></a> |
| <a href="#">313</a> | <a href="#">AC245041.3</a> | <a href="#">-2.353873496</a> | <a href="#">8.22x10<sup>-11</sup></a> | <a href="#">2.17x10<sup>-09</sup></a> |
| <a href="#">314</a> | <a href="#">DLX6-AS1</a>   | <a href="#">4.59034334</a>   | <a href="#">8.35x10<sup>-11</sup></a> | <a href="#">2.20x10<sup>-09</sup></a> |
| <a href="#">315</a> | <a href="#">AC007370.1</a> | <a href="#">-2.521453929</a> | <a href="#">8.49x10<sup>-11</sup></a> | <a href="#">2.23x10<sup>-09</sup></a> |
| <a href="#">316</a> | <a href="#">AC022929.1</a> | <a href="#">6.708889619</a>  | <a href="#">9.75x10<sup>-11</sup></a> | <a href="#">2.55x10<sup>-09</sup></a> |
| <a href="#">317</a> | <a href="#">AC005307.1</a> | <a href="#">3.711502439</a>  | <a href="#">9.72x10<sup>-11</sup></a> | <a href="#">2.55x10<sup>-09</sup></a> |
| <a href="#">318</a> | <a href="#">LINC01861</a>  | <a href="#">3.53116414</a>   | <a href="#">9.93x10<sup>-11</sup></a> | <a href="#">2.58x10<sup>-09</sup></a> |
| <a href="#">319</a> | <a href="#">LINC01247</a>  | <a href="#">4.614533102</a>  | <a href="#">1.00x10<sup>-10</sup></a> | <a href="#">2.61x10<sup>-09</sup></a> |
| <a href="#">320</a> | <a href="#">MGAT3-AS1</a>  | <a href="#">-2.434953508</a> | <a href="#">1.01x10<sup>-10</sup></a> | <a href="#">2.62x10<sup>-09</sup></a> |
| <a href="#">321</a> | <a href="#">AC011509.1</a> | <a href="#">4.711525049</a>  | <a href="#">1.02x10<sup>-10</sup></a> | <a href="#">2.63x10<sup>-09</sup></a> |
| <a href="#">322</a> | <a href="#">AP002765.2</a> | <a href="#">-2.353815158</a> | <a href="#">1.08x10<sup>-10</sup></a> | <a href="#">2.77x10<sup>-09</sup></a> |
| <a href="#">323</a> | <a href="#">LINC02097</a>  | <a href="#">-2.448003232</a> | <a href="#">1.07x10<sup>-10</sup></a> | <a href="#">2.77x10<sup>-09</sup></a> |
| <a href="#">324</a> | <a href="#">AC087897.2</a> | <a href="#">4.734283603</a>  | <a href="#">1.13x10<sup>-10</sup></a> | <a href="#">2.90x10<sup>-09</sup></a> |
| <a href="#">325</a> | <a href="#">AC110741.1</a> | <a href="#">3.251167212</a>  | <a href="#">1.13x10<sup>-10</sup></a> | <a href="#">2.90x10<sup>-09</sup></a> |
| <a href="#">326</a> | <a href="#">AF067845.2</a> | <a href="#">-2.366007313</a> | <a href="#">1.13x10<sup>-10</sup></a> | <a href="#">2.90x10<sup>-09</sup></a> |
| <a href="#">327</a> | <a href="#">TRPM2-AS</a>   | <a href="#">3.465394391</a>  | <a href="#">1.17x10<sup>-10</sup></a> | <a href="#">2.98x10<sup>-09</sup></a> |
| <a href="#">328</a> | <a href="#">AC090809.1</a> | <a href="#">3.147134816</a>  | <a href="#">1.17x10<sup>-10</sup></a> | <a href="#">2.98x10<sup>-09</sup></a> |
| <a href="#">329</a> | <a href="#">AC080037.1</a> | <a href="#">5.815773804</a>  | <a href="#">1.20x10<sup>-10</sup></a> | <a href="#">3.02x10<sup>-09</sup></a> |
| <a href="#">330</a> | <a href="#">AC020891.2</a> | <a href="#">5.346969821</a>  | <a href="#">1.23x10<sup>-10</sup></a> | <a href="#">3.09x10<sup>-09</sup></a> |
| <a href="#">331</a> | <a href="#">BCAR4</a>      | <a href="#">7.080546898</a>  | <a href="#">1.26x10<sup>-10</sup></a> | <a href="#">3.17x10<sup>-09</sup></a> |

|                     |                             |                              |                                       |                                       |
|---------------------|-----------------------------|------------------------------|---------------------------------------|---------------------------------------|
| <a href="#">332</a> | <a href="#">AP005062.1</a>  | <a href="#">5.63562763</a>   | <a href="#">1.26x10<sup>-10</sup></a> | <a href="#">3.17x10<sup>-09</sup></a> |
| <a href="#">333</a> | <a href="#">AL365356.5</a>  | <a href="#">5.813776782</a>  | <a href="#">1.28x10<sup>-10</sup></a> | <a href="#">3.21x10<sup>-09</sup></a> |
| <a href="#">334</a> | <a href="#">AP005233.2</a>  | <a href="#">6.601286844</a>  | <a href="#">1.31x10<sup>-10</sup></a> | <a href="#">3.26x10<sup>-09</sup></a> |
| <a href="#">335</a> | <a href="#">AC036176.3</a>  | <a href="#">2.704981</a>     | <a href="#">1.32x10<sup>-10</sup></a> | <a href="#">3.27x10<sup>-09</sup></a> |
| <a href="#">336</a> | <a href="#">PLCXD2-AS1</a>  | <a href="#">2.873381926</a>  | <a href="#">1.33x10<sup>-10</sup></a> | <a href="#">3.29x10<sup>-09</sup></a> |
| <a href="#">337</a> | <a href="#">AC083864.2</a>  | <a href="#">-2.149772371</a> | <a href="#">1.33x10<sup>-10</sup></a> | <a href="#">3.29x10<sup>-09</sup></a> |
| <a href="#">338</a> | <a href="#">AC147651.1</a>  | <a href="#">4.818203563</a>  | <a href="#">1.35x10<sup>-10</sup></a> | <a href="#">3.31x10<sup>-09</sup></a> |
| <a href="#">339</a> | <a href="#">LINC01983</a>   | <a href="#">2.311346636</a>  | <a href="#">1.35x10<sup>-10</sup></a> | <a href="#">3.31x10<sup>-09</sup></a> |
| <a href="#">340</a> | <a href="#">AC144836.1</a>  | <a href="#">3.42217383</a>   | <a href="#">1.37x10<sup>-10</sup></a> | <a href="#">3.36x10<sup>-09</sup></a> |
| <a href="#">341</a> | <a href="#">EPHA5-AS1</a>   | <a href="#">5.392767056</a>  | <a href="#">1.43x10<sup>-10</sup></a> | <a href="#">3.49x10<sup>-09</sup></a> |
| <a href="#">342</a> | <a href="#">LINC01287</a>   | <a href="#">5.88867388</a>   | <a href="#">1.48x10<sup>-10</sup></a> | <a href="#">3.62x10<sup>-09</sup></a> |
| <a href="#">343</a> | <a href="#">AC091057.3</a>  | <a href="#">2.5767939</a>    | <a href="#">1.51x10<sup>-10</sup></a> | <a href="#">3.66x10<sup>-09</sup></a> |
| <a href="#">344</a> | <a href="#">LINC02293</a>   | <a href="#">4.968127908</a>  | <a href="#">1.56x10<sup>-10</sup></a> | <a href="#">3.77x10<sup>-09</sup></a> |
| <a href="#">345</a> | <a href="#">HLX-AS1</a>     | <a href="#">-2.384229129</a> | <a href="#">1.56x10<sup>-10</sup></a> | <a href="#">3.78x10<sup>-09</sup></a> |
| <a href="#">346</a> | <a href="#">AC005291.2</a>  | <a href="#">4.736368334</a>  | <a href="#">1.65x10<sup>-10</sup></a> | <a href="#">3.98x10<sup>-09</sup></a> |
| <a href="#">347</a> | <a href="#">LINC00211</a>   | <a href="#">-2.435326459</a> | <a href="#">1.68x10<sup>-10</sup></a> | <a href="#">4.02x10<sup>-09</sup></a> |
| <a href="#">348</a> | <a href="#">AC008406.3</a>  | <a href="#">4.557102841</a>  | <a href="#">1.78x10<sup>-10</sup></a> | <a href="#">4.24x10<sup>-09</sup></a> |
| <a href="#">349</a> | <a href="#">AC024884.2</a>  | <a href="#">-2.566994534</a> | <a href="#">1.82x10<sup>-10</sup></a> | <a href="#">4.33x10<sup>-09</sup></a> |
| <a href="#">350</a> | <a href="#">MIR4713HG</a>   | <a href="#">4.702436571</a>  | <a href="#">1.86x10<sup>-10</sup></a> | <a href="#">4.42x10<sup>-09</sup></a> |
| <a href="#">351</a> | <a href="#">LINC02253</a>   | <a href="#">4.452271669</a>  | <a href="#">1.91x10<sup>-10</sup></a> | <a href="#">4.51x10<sup>-09</sup></a> |
| <a href="#">352</a> | <a href="#">LINC02159</a>   | <a href="#">4.202019344</a>  | <a href="#">2.01x10<sup>-10</sup></a> | <a href="#">4.72x10<sup>-09</sup></a> |
| <a href="#">353</a> | <a href="#">AC023796.2</a>  | <a href="#">4.384160322</a>  | <a href="#">2.04x10<sup>-10</sup></a> | <a href="#">4.77x10<sup>-09</sup></a> |
| <a href="#">354</a> | <a href="#">SRGAP3-AS4</a>  | <a href="#">3.502630197</a>  | <a href="#">2.05x10<sup>-10</sup></a> | <a href="#">4.81x10<sup>-09</sup></a> |
| <a href="#">355</a> | <a href="#">AL365184.1</a>  | <a href="#">-2.016730608</a> | <a href="#">2.07x10<sup>-10</sup></a> | <a href="#">4.82x10<sup>-09</sup></a> |
| <a href="#">356</a> | <a href="#">APCDD1L-AS1</a> | <a href="#">3.163589586</a>  | <a href="#">2.10x10<sup>-10</sup></a> | <a href="#">4.90x10<sup>-09</sup></a> |
| <a href="#">357</a> | <a href="#">AL359738.1</a>  | <a href="#">3.901753967</a>  | <a href="#">2.12x10<sup>-10</sup></a> | <a href="#">4.92x10<sup>-09</sup></a> |
| <a href="#">358</a> | <a href="#">AL160291.1</a>  | <a href="#">2.552703728</a>  | <a href="#">2.13x10<sup>-10</sup></a> | <a href="#">4.94x10<sup>-09</sup></a> |
| <a href="#">359</a> | <a href="#">AC034234.1</a>  | <a href="#">3.970163329</a>  | <a href="#">2.39x10<sup>-10</sup></a> | <a href="#">5.52x10<sup>-09</sup></a> |

|                     |                              |                              |                                       |                                       |
|---------------------|------------------------------|------------------------------|---------------------------------------|---------------------------------------|
| <a href="#">360</a> | <a href="#">AC087379.1</a>   | <a href="#">2.392574823</a>  | <a href="#">2.44x10<sup>-10</sup></a> | <a href="#">5.64x10<sup>-09</sup></a> |
| <a href="#">361</a> | <a href="#">LINC01837</a>    | <a href="#">4.335718249</a>  | <a href="#">2.55x10<sup>-10</sup></a> | <a href="#">5.86x10<sup>-09</sup></a> |
| <a href="#">362</a> | <a href="#">AC106900.2</a>   | <a href="#">5.017032761</a>  | <a href="#">2.63x10<sup>-10</sup></a> | <a href="#">6.04x10<sup>-09</sup></a> |
| <a href="#">363</a> | <a href="#">AL354714.4</a>   | <a href="#">-2.783769106</a> | <a href="#">2.66x10<sup>-10</sup></a> | <a href="#">6.09x10<sup>-09</sup></a> |
| <a href="#">364</a> | <a href="#">HOXC-AS1</a>     | <a href="#">3.404550652</a>  | <a href="#">2.74x10<sup>-10</sup></a> | <a href="#">6.27x10<sup>-09</sup></a> |
| <a href="#">365</a> | <a href="#">LINC01249</a>    | <a href="#">4.367327593</a>  | <a href="#">2.79x10<sup>-10</sup></a> | <a href="#">6.36x10<sup>-09</sup></a> |
| <a href="#">366</a> | <a href="#">AC078960.1</a>   | <a href="#">2.399230999</a>  | <a href="#">2.81x10<sup>-10</sup></a> | <a href="#">6.39x10<sup>-09</sup></a> |
| <a href="#">367</a> | <a href="#">AC092115.3</a>   | <a href="#">2.991853921</a>  | <a href="#">2.85x10<sup>-10</sup></a> | <a href="#">6.46x10<sup>-09</sup></a> |
| <a href="#">368</a> | <a href="#">AL136528.2</a>   | <a href="#">-2.243506402</a> | <a href="#">2.87x10<sup>-10</sup></a> | <a href="#">6.49x10<sup>-09</sup></a> |
| <a href="#">369</a> | <a href="#">AC021087.4</a>   | <a href="#">3.919765944</a>  | <a href="#">2.88x10<sup>-10</sup></a> | <a href="#">6.50x10<sup>-09</sup></a> |
| <a href="#">370</a> | <a href="#">RMRP</a>         | <a href="#">4.631707594</a>  | <a href="#">2.91x10<sup>-10</sup></a> | <a href="#">6.55x10<sup>-09</sup></a> |
| <a href="#">371</a> | <a href="#">AL391813.2</a>   | <a href="#">3.286005723</a>  | <a href="#">3.04x10<sup>-10</sup></a> | <a href="#">6.83x10<sup>-09</sup></a> |
| <a href="#">372</a> | <a href="#">AP000251.1</a>   | <a href="#">4.036857144</a>  | <a href="#">3.14x10<sup>-10</sup></a> | <a href="#">7.03x10<sup>-09</sup></a> |
| <a href="#">373</a> | <a href="#">AP007216.1</a>   | <a href="#">8.29670212</a>   | <a href="#">3.15x10<sup>-10</sup></a> | <a href="#">7.05x10<sup>-09</sup></a> |
| <a href="#">374</a> | <a href="#">LINC02029</a>    | <a href="#">4.21375078</a>   | <a href="#">3.24x10<sup>-10</sup></a> | <a href="#">7.20x10<sup>-09</sup></a> |
| <a href="#">375</a> | <a href="#">CLDN10-AS1</a>   | <a href="#">6.408369775</a>  | <a href="#">3.37x10<sup>-10</sup></a> | <a href="#">7.49x10<sup>-09</sup></a> |
| <a href="#">376</a> | <a href="#">POU6F2-AS1</a>   | <a href="#">4.395561758</a>  | <a href="#">3.74x10<sup>-10</sup></a> | <a href="#">8.29x10<sup>-09</sup></a> |
| <a href="#">377</a> | <a href="#">AC114489.1</a>   | <a href="#">2.029851218</a>  | <a href="#">3.87x10<sup>-10</sup></a> | <a href="#">8.57x10<sup>-09</sup></a> |
| <a href="#">378</a> | <a href="#">AC012501.1</a>   | <a href="#">5.294545751</a>  | <a href="#">4.03x10<sup>-10</sup></a> | <a href="#">8.89x10<sup>-09</sup></a> |
| <a href="#">379</a> | <a href="#">AC073316.2</a>   | <a href="#">4.032413493</a>  | <a href="#">4.07x10<sup>-10</sup></a> | <a href="#">8.97x10<sup>-09</sup></a> |
| <a href="#">380</a> | <a href="#">AP003900.1</a>   | <a href="#">5.046417361</a>  | <a href="#">4.22x10<sup>-10</sup></a> | <a href="#">9.26x10<sup>-09</sup></a> |
| <a href="#">381</a> | <a href="#">LINC02416</a>    | <a href="#">3.910850095</a>  | <a href="#">4.25x10<sup>-10</sup></a> | <a href="#">9.30x10<sup>-09</sup></a> |
| <a href="#">382</a> | <a href="#">AC005537.1</a>   | <a href="#">2.48461856</a>   | <a href="#">4.50x10<sup>-10</sup></a> | <a href="#">9.80x10<sup>-09</sup></a> |
| <a href="#">383</a> | <a href="#">AC008662.2</a>   | <a href="#">6.666356636</a>  | <a href="#">4.53x10<sup>-10</sup></a> | <a href="#">9.84x10<sup>-09</sup></a> |
| <a href="#">384</a> | <a href="#">AL365226.2</a>   | <a href="#">3.458741779</a>  | <a href="#">4.53x10<sup>-10</sup></a> | <a href="#">9.84x10<sup>-09</sup></a> |
| <a href="#">385</a> | <a href="#">AC016044.1</a>   | <a href="#">6.861015293</a>  | <a href="#">4.68x10<sup>-10</sup></a> | <a href="#">1.01x10<sup>-08</sup></a> |
| <a href="#">386</a> | <a href="#">LINC02263</a>    | <a href="#">2.693666214</a>  | <a href="#">4.68x10<sup>-10</sup></a> | <a href="#">1.01x10<sup>-08</sup></a> |
| <a href="#">387</a> | <a href="#">TMEM132D-AS1</a> | <a href="#">5.899408183</a>  | <a href="#">4.76x10<sup>-10</sup></a> | <a href="#">1.02x10<sup>-08</sup></a> |

|                     |                            |                              |                                       |                                       |
|---------------------|----------------------------|------------------------------|---------------------------------------|---------------------------------------|
| <a href="#">388</a> | <a href="#">AL645608.7</a> | <a href="#">3.515857985</a>  | <a href="#">4.78x10<sup>-10</sup></a> | <a href="#">1.03x10<sup>-08</sup></a> |
| <a href="#">389</a> | <a href="#">LINC01257</a>  | <a href="#">3.419631347</a>  | <a href="#">4.80x10<sup>-10</sup></a> | <a href="#">1.03x10<sup>-08</sup></a> |
| <a href="#">390</a> | <a href="#">AC092111.3</a> | <a href="#">3.39141669</a>   | <a href="#">4.78x10<sup>-10</sup></a> | <a href="#">1.03x10<sup>-08</sup></a> |
| <a href="#">391</a> | <a href="#">LINC02223</a>  | <a href="#">3.71455345</a>   | <a href="#">4.88x10<sup>-10</sup></a> | <a href="#">1.04x10<sup>-08</sup></a> |
| <a href="#">392</a> | <a href="#">AL355075.4</a> | <a href="#">4.843943426</a>  | <a href="#">4.99x10<sup>-10</sup></a> | <a href="#">1.07x10<sup>-08</sup></a> |
| <a href="#">393</a> | <a href="#">AC139099.1</a> | <a href="#">2.696725487</a>  | <a href="#">5.07x10<sup>-10</sup></a> | <a href="#">1.08x10<sup>-08</sup></a> |
| <a href="#">394</a> | <a href="#">AC010789.1</a> | <a href="#">4.92641712</a>   | <a href="#">5.16x10<sup>-10</sup></a> | <a href="#">1.10x10<sup>-08</sup></a> |
| <a href="#">395</a> | <a href="#">LINC01269</a>  | <a href="#">2.049889138</a>  | <a href="#">5.32x10<sup>-10</sup></a> | <a href="#">1.13x10<sup>-08</sup></a> |
| <a href="#">396</a> | <a href="#">AP001505.1</a> | <a href="#">-2.093753071</a> | <a href="#">5.43x10<sup>-10</sup></a> | <a href="#">1.15x10<sup>-08</sup></a> |
| <a href="#">397</a> | <a href="#">AC046195.1</a> | <a href="#">-2.377001102</a> | <a href="#">5.57x10<sup>-10</sup></a> | <a href="#">1.17x10<sup>-08</sup></a> |
| <a href="#">398</a> | <a href="#">AC128709.2</a> | <a href="#">-2.509536244</a> | <a href="#">5.57x10<sup>-10</sup></a> | <a href="#">1.17x10<sup>-08</sup></a> |
| <a href="#">399</a> | <a href="#">PGM5-AS1</a>   | <a href="#">-2.296332461</a> | <a href="#">5.80x10<sup>-10</sup></a> | <a href="#">1.22x10<sup>-08</sup></a> |
| <a href="#">400</a> | <a href="#">LINC00251</a>  | <a href="#">4.993627609</a>  | <a href="#">5.86x10<sup>-10</sup></a> | <a href="#">1.23x10<sup>-08</sup></a> |
| <a href="#">401</a> | <a href="#">FP325330.3</a> | <a href="#">5.590667571</a>  | <a href="#">6.02x10<sup>-10</sup></a> | <a href="#">1.26x10<sup>-08</sup></a> |
| <a href="#">402</a> | <a href="#">AC236972.3</a> | <a href="#">-2.389341626</a> | <a href="#">6.11x10<sup>-10</sup></a> | <a href="#">1.28x10<sup>-08</sup></a> |
| <a href="#">403</a> | <a href="#">AL138775.1</a> | <a href="#">-2.455005365</a> | <a href="#">6.18x10<sup>-10</sup></a> | <a href="#">1.29x10<sup>-08</sup></a> |
| <a href="#">404</a> | <a href="#">LINC02314</a>  | <a href="#">4.361144958</a>  | <a href="#">6.27x10<sup>-10</sup></a> | <a href="#">1.30x10<sup>-08</sup></a> |
| <a href="#">405</a> | <a href="#">AC044791.1</a> | <a href="#">5.92657864</a>   | <a href="#">6.39x10<sup>-10</sup></a> | <a href="#">1.32x10<sup>-08</sup></a> |
| <a href="#">406</a> | <a href="#">USP12-AS1</a>  | <a href="#">2.948054898</a>  | <a href="#">6.37x10<sup>-10</sup></a> | <a href="#">1.32x10<sup>-08</sup></a> |
| <a href="#">407</a> | <a href="#">AC022173.1</a> | <a href="#">3.425362646</a>  | <a href="#">6.46x10<sup>-10</sup></a> | <a href="#">1.33x10<sup>-08</sup></a> |
| <a href="#">408</a> | <a href="#">Z98949.3</a>   | <a href="#">2.736091236</a>  | <a href="#">6.50x10<sup>-10</sup></a> | <a href="#">1.34x10<sup>-08</sup></a> |
| <a href="#">409</a> | <a href="#">AC087269.1</a> | <a href="#">4.193514992</a>  | <a href="#">6.69x10<sup>-10</sup></a> | <a href="#">1.37x10<sup>-08</sup></a> |
| <a href="#">410</a> | <a href="#">LINC02163</a>  | <a href="#">3.055048021</a>  | <a href="#">6.68x10<sup>-10</sup></a> | <a href="#">1.37x10<sup>-08</sup></a> |
| <a href="#">411</a> | <a href="#">AC012213.4</a> | <a href="#">3.2762765</a>    | <a href="#">6.78x10<sup>-10</sup></a> | <a href="#">1.39x10<sup>-08</sup></a> |
| <a href="#">412</a> | <a href="#">SIX3-AS1</a>   | <a href="#">5.144591177</a>  | <a href="#">6.88x10<sup>-10</sup></a> | <a href="#">1.41x10<sup>-08</sup></a> |
| <a href="#">413</a> | <a href="#">AC012213.2</a> | <a href="#">2.4347133</a>    | <a href="#">6.92x10<sup>-10</sup></a> | <a href="#">1.41x10<sup>-08</sup></a> |
| <a href="#">414</a> | <a href="#">AC044840.1</a> | <a href="#">2.229824337</a>  | <a href="#">6.97x10<sup>-10</sup></a> | <a href="#">1.42x10<sup>-08</sup></a> |
| <a href="#">415</a> | <a href="#">LINC01213</a>  | <a href="#">4.27014714</a>   | <a href="#">7.19x10<sup>-10</sup></a> | <a href="#">1.46x10<sup>-08</sup></a> |

|                     |                            |                              |                                       |                                       |
|---------------------|----------------------------|------------------------------|---------------------------------------|---------------------------------------|
| <a href="#">416</a> | <a href="#">LINC00483</a>  | <a href="#">2.749102005</a>  | <a href="#">7.18x10<sup>-10</sup></a> | <a href="#">1.46x10<sup>-08</sup></a> |
| <a href="#">417</a> | <a href="#">AC005358.1</a> | <a href="#">-2.005428957</a> | <a href="#">7.29x10<sup>-10</sup></a> | <a href="#">1.47x10<sup>-08</sup></a> |
| <a href="#">418</a> | <a href="#">NOVA1-AS1</a>  | <a href="#">6.173044512</a>  | <a href="#">7.32x10<sup>-10</sup></a> | <a href="#">1.48x10<sup>-08</sup></a> |
| <a href="#">419</a> | <a href="#">AC003986.2</a> | <a href="#">4.110921129</a>  | <a href="#">7.54x10<sup>-10</sup></a> | <a href="#">1.52x10<sup>-08</sup></a> |
| <a href="#">420</a> | <a href="#">LINC02259</a>  | <a href="#">3.191544236</a>  | <a href="#">7.57x10<sup>-10</sup></a> | <a href="#">1.52x10<sup>-08</sup></a> |
| <a href="#">421</a> | <a href="#">AC132825.3</a> | <a href="#">4.2179927</a>    | <a href="#">7.61x10<sup>-10</sup></a> | <a href="#">1.53x10<sup>-08</sup></a> |
| <a href="#">422</a> | <a href="#">DSG1-AS1</a>   | <a href="#">5.61304897</a>   | <a href="#">7.99x10<sup>-10</sup></a> | <a href="#">1.59x10<sup>-08</sup></a> |
| <a href="#">423</a> | <a href="#">AP003486.1</a> | <a href="#">2.086011939</a>  | <a href="#">7.94x10<sup>-10</sup></a> | <a href="#">1.59x10<sup>-08</sup></a> |
| <a href="#">424</a> | <a href="#">AL079303.2</a> | <a href="#">3.741222353</a>  | <a href="#">8.02x10<sup>-10</sup></a> | <a href="#">1.60x10<sup>-08</sup></a> |
| <a href="#">425</a> | <a href="#">LINC01785</a>  | <a href="#">-2.28829723</a>  | <a href="#">8.37x10<sup>-10</sup></a> | <a href="#">1.66x10<sup>-08</sup></a> |
| <a href="#">426</a> | <a href="#">AC093281.2</a> | <a href="#">4.637837457</a>  | <a href="#">8.42x10<sup>-10</sup></a> | <a href="#">1.67x10<sup>-08</sup></a> |
| <a href="#">427</a> | <a href="#">LINC00626</a>  | <a href="#">2.726966912</a>  | <a href="#">8.62x10<sup>-10</sup></a> | <a href="#">1.70x10<sup>-08</sup></a> |
| <a href="#">428</a> | <a href="#">AC006548.3</a> | <a href="#">2.499759974</a>  | <a href="#">8.62x10<sup>-10</sup></a> | <a href="#">1.70x10<sup>-08</sup></a> |
| <a href="#">429</a> | <a href="#">PTPRD-AS1</a>  | <a href="#">-2.280835811</a> | <a href="#">8.58x10<sup>-10</sup></a> | <a href="#">1.70x10<sup>-08</sup></a> |
| <a href="#">430</a> | <a href="#">AC106874.1</a> | <a href="#">-2.161612816</a> | <a href="#">8.74x10<sup>-10</sup></a> | <a href="#">1.72x10<sup>-08</sup></a> |
| <a href="#">431</a> | <a href="#">AC084262.1</a> | <a href="#">3.906914512</a>  | <a href="#">8.84x10<sup>-10</sup></a> | <a href="#">1.74x10<sup>-08</sup></a> |
| <a href="#">432</a> | <a href="#">AL592182.1</a> | <a href="#">4.399632987</a>  | <a href="#">9.33x10<sup>-10</sup></a> | <a href="#">1.83x10<sup>-08</sup></a> |
| <a href="#">433</a> | <a href="#">AC114812.2</a> | <a href="#">3.599142521</a>  | <a href="#">9.70x10<sup>-10</sup></a> | <a href="#">1.89x10<sup>-08</sup></a> |
| <a href="#">434</a> | <a href="#">AF274855.1</a> | <a href="#">7.390806667</a>  | <a href="#">9.74x10<sup>-10</sup></a> | <a href="#">1.90x10<sup>-08</sup></a> |
| <a href="#">435</a> | <a href="#">AL157401.1</a> | <a href="#">5.27028294</a>   | <a href="#">9.83x10<sup>-10</sup></a> | <a href="#">1.91x10<sup>-08</sup></a> |
| <a href="#">436</a> | <a href="#">AC005833.4</a> | <a href="#">2.655823742</a>  | <a href="#">9.87x10<sup>-10</sup></a> | <a href="#">1.92x10<sup>-08</sup></a> |
| <a href="#">437</a> | <a href="#">AP000424.1</a> | <a href="#">3.87099667</a>   | <a href="#">1.00x10<sup>-09</sup></a> | <a href="#">1.94x10<sup>-08</sup></a> |
| <a href="#">438</a> | <a href="#">AC093496.1</a> | <a href="#">3.854325714</a>  | <a href="#">1.02x10<sup>-09</sup></a> | <a href="#">1.97x10<sup>-08</sup></a> |
| <a href="#">439</a> | <a href="#">POU6F2-AS2</a> | <a href="#">6.49404985</a>   | <a href="#">1.02x10<sup>-09</sup></a> | <a href="#">1.98x10<sup>-08</sup></a> |
| <a href="#">440</a> | <a href="#">AC004816.2</a> | <a href="#">3.018504928</a>  | <a href="#">1.04x10<sup>-09</sup></a> | <a href="#">2.01x10<sup>-08</sup></a> |
| <a href="#">441</a> | <a href="#">AC068700.1</a> | <a href="#">-2.368146494</a> | <a href="#">1.06x10<sup>-09</sup></a> | <a href="#">2.04x10<sup>-08</sup></a> |
| <a href="#">442</a> | <a href="#">AC011298.1</a> | <a href="#">6.858238179</a>  | <a href="#">1.07x10<sup>-09</sup></a> | <a href="#">2.05x10<sup>-08</sup></a> |
| <a href="#">443</a> | <a href="#">AF274573.2</a> | <a href="#">4.862888178</a>  | <a href="#">1.07x10<sup>-09</sup></a> | <a href="#">2.06x10<sup>-08</sup></a> |



|                     |                            |                              |                                       |                                       |
|---------------------|----------------------------|------------------------------|---------------------------------------|---------------------------------------|
| <a href="#">444</a> | <a href="#">AL355478.1</a> | <a href="#">4.054629932</a>  | <a href="#">1.11x10<sup>-09</sup></a> | <a href="#">2.11x10<sup>-08</sup></a> |
| <a href="#">445</a> | <a href="#">AC097487.1</a> | <a href="#">3.499666611</a>  | <a href="#">1.10x10<sup>-09</sup></a> | <a href="#">2.11x10<sup>-08</sup></a> |
| <a href="#">446</a> | <a href="#">AL117355.1</a> | <a href="#">4.620287722</a>  | <a href="#">1.15x10<sup>-09</sup></a> | <a href="#">2.19x10<sup>-08</sup></a> |
| <a href="#">447</a> | <a href="#">AC243773.2</a> | <a href="#">6.544899578</a>  | <a href="#">1.20x10<sup>-09</sup></a> | <a href="#">2.27x10<sup>-08</sup></a> |
| <a href="#">448</a> | <a href="#">AP001107.7</a> | <a href="#">-2.119776868</a> | <a href="#">1.20x10<sup>-09</sup></a> | <a href="#">2.28x10<sup>-08</sup></a> |
| <a href="#">449</a> | <a href="#">AC107376.1</a> | <a href="#">3.663804679</a>  | <a href="#">1.22x10<sup>-09</sup></a> | <a href="#">2.31x10<sup>-08</sup></a> |
| <a href="#">450</a> | <a href="#">LINC00901</a>  | <a href="#">3.189447312</a>  | <a href="#">1.33x10<sup>-09</sup></a> | <a href="#">2.49x10<sup>-08</sup></a> |
| <a href="#">451</a> | <a href="#">ISPD-AS1</a>   | <a href="#">2.601815147</a>  | <a href="#">1.33x10<sup>-09</sup></a> | <a href="#">2.49x10<sup>-08</sup></a> |
| <a href="#">452</a> | <a href="#">AP003064.2</a> | <a href="#">-2.323713357</a> | <a href="#">1.34x10<sup>-09</sup></a> | <a href="#">2.50x10<sup>-08</sup></a> |
| <a href="#">453</a> | <a href="#">KCNMB2-AS1</a> | <a href="#">6.211989213</a>  | <a href="#">1.37x10<sup>-09</sup></a> | <a href="#">2.55x10<sup>-08</sup></a> |
| <a href="#">454</a> | <a href="#">AL049830.3</a> | <a href="#">2.138588765</a>  | <a href="#">1.41x10<sup>-09</sup></a> | <a href="#">2.63x10<sup>-08</sup></a> |
| <a href="#">455</a> | <a href="#">AL445231.1</a> | <a href="#">2.249328799</a>  | <a href="#">1.44x10<sup>-09</sup></a> | <a href="#">2.68x10<sup>-08</sup></a> |
| <a href="#">456</a> | <a href="#">AL161804.1</a> | <a href="#">3.10477423</a>   | <a href="#">1.47x10<sup>-09</sup></a> | <a href="#">2.72x10<sup>-08</sup></a> |
| <a href="#">457</a> | <a href="#">MAFA-AS1</a>   | <a href="#">4.492750253</a>  | <a href="#">1.48x10<sup>-09</sup></a> | <a href="#">2.73x10<sup>-08</sup></a> |
| <a href="#">458</a> | <a href="#">AL022314.1</a> | <a href="#">3.035632019</a>  | <a href="#">1.51x10<sup>-09</sup></a> | <a href="#">2.78x10<sup>-08</sup></a> |
| <a href="#">459</a> | <a href="#">CU639417.6</a> | <a href="#">3.599784785</a>  | <a href="#">1.53x10<sup>-09</sup></a> | <a href="#">2.81x10<sup>-08</sup></a> |
| <a href="#">460</a> | <a href="#">AC007599.2</a> | <a href="#">3.78790635</a>   | <a href="#">1.55x10<sup>-09</sup></a> | <a href="#">2.85x10<sup>-08</sup></a> |
| <a href="#">461</a> | <a href="#">LINC02224</a>  | <a href="#">6.184870826</a>  | <a href="#">1.58x10<sup>-09</sup></a> | <a href="#">2.89x10<sup>-08</sup></a> |
| <a href="#">462</a> | <a href="#">LINC01460</a>  | <a href="#">4.035284501</a>  | <a href="#">1.65x10<sup>-09</sup></a> | <a href="#">3.01x10<sup>-08</sup></a> |
| <a href="#">463</a> | <a href="#">AC009558.2</a> | <a href="#">3.428872673</a>  | <a href="#">1.69x10<sup>-09</sup></a> | <a href="#">3.09x10<sup>-08</sup></a> |
| <a href="#">464</a> | <a href="#">AC135388.1</a> | <a href="#">2.995954447</a>  | <a href="#">1.93x10<sup>-09</sup></a> | <a href="#">3.49x10<sup>-08</sup></a> |
| <a href="#">465</a> | <a href="#">UG0898H09</a>  | <a href="#">2.856891925</a>  | <a href="#">1.96x10<sup>-09</sup></a> | <a href="#">3.54x10<sup>-08</sup></a> |
| <a href="#">466</a> | <a href="#">LINC01728</a>  | <a href="#">5.215809922</a>  | <a href="#">1.98x10<sup>-09</sup></a> | <a href="#">3.56x10<sup>-08</sup></a> |
| <a href="#">467</a> | <a href="#">AL137024.1</a> | <a href="#">2.064271015</a>  | <a href="#">1.99x10<sup>-09</sup></a> | <a href="#">3.59x10<sup>-08</sup></a> |
| <a href="#">468</a> | <a href="#">AL354993.1</a> | <a href="#">2.54493163</a>   | <a href="#">2.02x10<sup>-09</sup></a> | <a href="#">3.64x10<sup>-08</sup></a> |
| <a href="#">469</a> | <a href="#">AC011396.3</a> | <a href="#">2.475199161</a>  | <a href="#">2.03x10<sup>-09</sup></a> | <a href="#">3.64x10<sup>-08</sup></a> |
| <a href="#">470</a> | <a href="#">LINC02385</a>  | <a href="#">3.487330306</a>  | <a href="#">2.06x10<sup>-09</sup></a> | <a href="#">3.68x10<sup>-08</sup></a> |
| <a href="#">471</a> | <a href="#">AC027277.2</a> | <a href="#">-2.393313281</a> | <a href="#">2.05x10<sup>-09</sup></a> | <a href="#">3.68x10<sup>-08</sup></a> |

|                     |                            |                              |                                       |                                       |
|---------------------|----------------------------|------------------------------|---------------------------------------|---------------------------------------|
| <a href="#">472</a> | <a href="#">AC073578.2</a> | <a href="#">2.802395498</a>  | <a href="#">2.08x10<sup>-09</sup></a> | <a href="#">3.72x10<sup>-08</sup></a> |
| <a href="#">473</a> | <a href="#">CALML3-AS1</a> | <a href="#">4.18564851</a>   | <a href="#">2.12x10<sup>-09</sup></a> | <a href="#">3.77x10<sup>-08</sup></a> |
| <a href="#">474</a> | <a href="#">ZFHX4-AS1</a>  | <a href="#">2.629328031</a>  | <a href="#">2.11x10<sup>-09</sup></a> | <a href="#">3.77x10<sup>-08</sup></a> |
| <a href="#">475</a> | <a href="#">MIR2052HG</a>  | <a href="#">2.283509247</a>  | <a href="#">2.14x10<sup>-09</sup></a> | <a href="#">3.79x10<sup>-08</sup></a> |
| <a href="#">476</a> | <a href="#">LINC01350</a>  | <a href="#">3.334625807</a>  | <a href="#">2.17x10<sup>-09</sup></a> | <a href="#">3.84x10<sup>-08</sup></a> |
| <a href="#">477</a> | <a href="#">LINC01695</a>  | <a href="#">2.761083926</a>  | <a href="#">2.32x10<sup>-09</sup></a> | <a href="#">4.10x10<sup>-08</sup></a> |
| <a href="#">478</a> | <a href="#">AL365356.4</a> | <a href="#">4.81051857</a>   | <a href="#">2.36x10<sup>-09</sup></a> | <a href="#">4.16x10<sup>-08</sup></a> |
| <a href="#">479</a> | <a href="#">AC244035.3</a> | <a href="#">3.62508401</a>   | <a href="#">2.36x10<sup>-09</sup></a> | <a href="#">4.16x10<sup>-08</sup></a> |
| <a href="#">480</a> | <a href="#">AC040174.1</a> | <a href="#">3.567206079</a>  | <a href="#">2.45x10<sup>-09</sup></a> | <a href="#">4.30x10<sup>-08</sup></a> |
| <a href="#">481</a> | <a href="#">LINC01807</a>  | <a href="#">6.049234117</a>  | <a href="#">2.47x10<sup>-09</sup></a> | <a href="#">4.33x10<sup>-08</sup></a> |
| <a href="#">482</a> | <a href="#">AC062021.1</a> | <a href="#">4.489318437</a>  | <a href="#">2.48x10<sup>-09</sup></a> | <a href="#">4.35x10<sup>-08</sup></a> |
| <a href="#">483</a> | <a href="#">LINC02156</a>  | <a href="#">3.463708672</a>  | <a href="#">2.51x10<sup>-09</sup></a> | <a href="#">4.38x10<sup>-08</sup></a> |
| <a href="#">484</a> | <a href="#">HOXC-AS3</a>   | <a href="#">5.689856423</a>  | <a href="#">2.56x10<sup>-09</sup></a> | <a href="#">4.47x10<sup>-08</sup></a> |
| <a href="#">485</a> | <a href="#">AC003070.2</a> | <a href="#">-2.039839308</a> | <a href="#">2.57x10<sup>-09</sup></a> | <a href="#">4.48x10<sup>-08</sup></a> |
| <a href="#">486</a> | <a href="#">AC011352.1</a> | <a href="#">2.761657074</a>  | <a href="#">2.59x10<sup>-09</sup></a> | <a href="#">4.50x10<sup>-08</sup></a> |
| <a href="#">487</a> | <a href="#">AL390726.4</a> | <a href="#">3.753812604</a>  | <a href="#">2.61x10<sup>-09</sup></a> | <a href="#">4.53x10<sup>-08</sup></a> |
| <a href="#">488</a> | <a href="#">AC138207.5</a> | <a href="#">2.137840585</a>  | <a href="#">2.65x10<sup>-09</sup></a> | <a href="#">4.59x10<sup>-08</sup></a> |
| <a href="#">489</a> | <a href="#">AL591719.2</a> | <a href="#">3.691001367</a>  | <a href="#">2.70x10<sup>-09</sup></a> | <a href="#">4.67x10<sup>-08</sup></a> |
| <a href="#">490</a> | <a href="#">AC108199.1</a> | <a href="#">3.631642097</a>  | <a href="#">2.70x10<sup>-09</sup></a> | <a href="#">4.67x10<sup>-08</sup></a> |
| <a href="#">491</a> | <a href="#">LINC01792</a>  | <a href="#">3.708747327</a>  | <a href="#">2.77x10<sup>-09</sup></a> | <a href="#">4.77x10<sup>-08</sup></a> |
| <a href="#">492</a> | <a href="#">AP006333.2</a> | <a href="#">2.851224283</a>  | <a href="#">2.79x10<sup>-09</sup></a> | <a href="#">4.79x10<sup>-08</sup></a> |
| <a href="#">493</a> | <a href="#">AL390962.1</a> | <a href="#">4.126482913</a>  | <a href="#">2.84x10<sup>-09</sup></a> | <a href="#">4.87x10<sup>-08</sup></a> |
| <a href="#">494</a> | <a href="#">LINC00393</a>  | <a href="#">6.403430187</a>  | <a href="#">2.87x10<sup>-09</sup></a> | <a href="#">4.90x10<sup>-08</sup></a> |
| <a href="#">495</a> | <a href="#">AC087260.1</a> | <a href="#">5.909115979</a>  | <a href="#">2.87x10<sup>-09</sup></a> | <a href="#">4.90x10<sup>-08</sup></a> |
| <a href="#">496</a> | <a href="#">AC099554.1</a> | <a href="#">-2.070552252</a> | <a href="#">2.87x10<sup>-09</sup></a> | <a href="#">4.90x10<sup>-08</sup></a> |
| <a href="#">497</a> | <a href="#">AC090519.2</a> | <a href="#">3.227491384</a>  | <a href="#">3.02x10<sup>-09</sup></a> | <a href="#">5.14x10<sup>-08</sup></a> |
| <a href="#">498</a> | <a href="#">AC040174.2</a> | <a href="#">2.214884031</a>  | <a href="#">3.05x10<sup>-09</sup></a> | <a href="#">5.18x10<sup>-08</sup></a> |
| <a href="#">499</a> | <a href="#">AC087190.2</a> | <a href="#">5.452030882</a>  | <a href="#">3.06x10<sup>-09</sup></a> | <a href="#">5.19x10<sup>-08</sup></a> |

|                     |                            |                              |                                       |                                       |
|---------------------|----------------------------|------------------------------|---------------------------------------|---------------------------------------|
| <a href="#">500</a> | <a href="#">AC012640.1</a> | <a href="#">3.806680976</a>  | <a href="#">3.08x10<sup>-09</sup></a> | <a href="#">5.22x10<sup>-08</sup></a> |
| <a href="#">501</a> | <a href="#">RAI1-AS1</a>   | <a href="#">2.669144349</a>  | <a href="#">3.08x10<sup>-09</sup></a> | <a href="#">5.23x10<sup>-08</sup></a> |
| <a href="#">502</a> | <a href="#">AC097358.2</a> | <a href="#">3.628252593</a>  | <a href="#">3.17x10<sup>-09</sup></a> | <a href="#">5.36x10<sup>-08</sup></a> |
| <a href="#">503</a> | <a href="#">LINC01629</a>  | <a href="#">2.767248613</a>  | <a href="#">3.17x10<sup>-09</sup></a> | <a href="#">5.36x10<sup>-08</sup></a> |
| <a href="#">504</a> | <a href="#">AF274856.1</a> | <a href="#">2.920140822</a>  | <a href="#">3.26x10<sup>-09</sup></a> | <a href="#">5.50x10<sup>-08</sup></a> |
| <a href="#">505</a> | <a href="#">AC108516.1</a> | <a href="#">-2.367429621</a> | <a href="#">3.37x10<sup>-09</sup></a> | <a href="#">5.68x10<sup>-08</sup></a> |
| <a href="#">506</a> | <a href="#">AC105446.1</a> | <a href="#">2.859556196</a>  | <a href="#">3.42x10<sup>-09</sup></a> | <a href="#">5.76x10<sup>-08</sup></a> |
| <a href="#">507</a> | <a href="#">AC103702.2</a> | <a href="#">4.996822771</a>  | <a href="#">3.44x10<sup>-09</sup></a> | <a href="#">5.77x10<sup>-08</sup></a> |
| <a href="#">508</a> | <a href="#">HOXC-AS2</a>   | <a href="#">5.432862141</a>  | <a href="#">3.50x10<sup>-09</sup></a> | <a href="#">5.86x10<sup>-08</sup></a> |
| <a href="#">509</a> | <a href="#">AC103740.2</a> | <a href="#">4.742942107</a>  | <a href="#">3.50x10<sup>-09</sup></a> | <a href="#">5.86x10<sup>-08</sup></a> |
| <a href="#">510</a> | <a href="#">LINC02300</a>  | <a href="#">2.636833471</a>  | <a href="#">3.61x10<sup>-09</sup></a> | <a href="#">6.03x10<sup>-08</sup></a> |
| <a href="#">511</a> | <a href="#">AF130417.1</a> | <a href="#">3.970270546</a>  | <a href="#">3.74x10<sup>-09</sup></a> | <a href="#">6.21x10<sup>-08</sup></a> |
| <a href="#">512</a> | <a href="#">AC007671.1</a> | <a href="#">-2.004024157</a> | <a href="#">4.04x10<sup>-09</sup></a> | <a href="#">6.66x10<sup>-08</sup></a> |
| <a href="#">513</a> | <a href="#">LINC01967</a>  | <a href="#">5.59001279</a>   | <a href="#">4.06x10<sup>-09</sup></a> | <a href="#">6.69x10<sup>-08</sup></a> |
| <a href="#">514</a> | <a href="#">DOCK4-AS1</a>  | <a href="#">2.194076685</a>  | <a href="#">4.09x10<sup>-09</sup></a> | <a href="#">6.72x10<sup>-08</sup></a> |
| <a href="#">515</a> | <a href="#">AP003385.5</a> | <a href="#">4.510824064</a>  | <a href="#">4.13x10<sup>-09</sup></a> | <a href="#">6.79x10<sup>-08</sup></a> |
| <a href="#">516</a> | <a href="#">AL158151.2</a> | <a href="#">-2.149679196</a> | <a href="#">4.18x10<sup>-09</sup></a> | <a href="#">6.85x10<sup>-08</sup></a> |
| <a href="#">517</a> | <a href="#">AC244250.1</a> | <a href="#">2.27808403</a>   | <a href="#">4.27x10<sup>-09</sup></a> | <a href="#">6.98x10<sup>-08</sup></a> |
| <a href="#">518</a> | <a href="#">LINC01436</a>  | <a href="#">3.388372962</a>  | <a href="#">4.38x10<sup>-09</sup></a> | <a href="#">7.16x10<sup>-08</sup></a> |
| <a href="#">519</a> | <a href="#">AC103764.1</a> | <a href="#">2.263776134</a>  | <a href="#">4.43x10<sup>-09</sup></a> | <a href="#">7.22x10<sup>-08</sup></a> |
| <a href="#">520</a> | <a href="#">AC009902.2</a> | <a href="#">2.223517729</a>  | <a href="#">4.48x10<sup>-09</sup></a> | <a href="#">7.29x10<sup>-08</sup></a> |
| <a href="#">521</a> | <a href="#">CCAT1</a>      | <a href="#">6.290271405</a>  | <a href="#">4.50x10<sup>-09</sup></a> | <a href="#">7.32x10<sup>-08</sup></a> |
| <a href="#">522</a> | <a href="#">ZFPM2-AS1</a>  | <a href="#">5.614196112</a>  | <a href="#">4.50x10<sup>-09</sup></a> | <a href="#">7.32x10<sup>-08</sup></a> |
| <a href="#">523</a> | <a href="#">AC091044.1</a> | <a href="#">-2.078075405</a> | <a href="#">4.52x10<sup>-09</sup></a> | <a href="#">7.34x10<sup>-08</sup></a> |
| <a href="#">524</a> | <a href="#">AL365181.3</a> | <a href="#">4.819260244</a>  | <a href="#">4.55x10<sup>-09</sup></a> | <a href="#">7.37x10<sup>-08</sup></a> |
| <a href="#">525</a> | <a href="#">AC131009.2</a> | <a href="#">2.963615948</a>  | <a href="#">4.72x10<sup>-09</sup></a> | <a href="#">7.61x10<sup>-08</sup></a> |
| <a href="#">526</a> | <a href="#">AC099063.1</a> | <a href="#">2.727722361</a>  | <a href="#">4.72x10<sup>-09</sup></a> | <a href="#">7.61x10<sup>-08</sup></a> |
| <a href="#">527</a> | <a href="#">AL513324.1</a> | <a href="#">3.334949763</a>  | <a href="#">4.85x10<sup>-09</sup></a> | <a href="#">7.78x10<sup>-08</sup></a> |

|                     |                             |                              |                                       |                                       |
|---------------------|-----------------------------|------------------------------|---------------------------------------|---------------------------------------|
| <a href="#">528</a> | <a href="#">LINC00392</a>   | <a href="#">6.381504724</a>  | <a href="#">4.92x10<sup>-09</sup></a> | <a href="#">7.87x10<sup>-08</sup></a> |
| <a href="#">529</a> | <a href="#">AL139420.1</a>  | <a href="#">3.870733162</a>  | <a href="#">5.09x10<sup>-09</sup></a> | <a href="#">8.13x10<sup>-08</sup></a> |
| <a href="#">530</a> | <a href="#">LINC01419</a>   | <a href="#">6.123492355</a>  | <a href="#">5.31x10<sup>-09</sup></a> | <a href="#">8.44x10<sup>-08</sup></a> |
| <a href="#">531</a> | <a href="#">LINC00648</a>   | <a href="#">2.899812026</a>  | <a href="#">5.30x10<sup>-09</sup></a> | <a href="#">8.44x10<sup>-08</sup></a> |
| <a href="#">532</a> | <a href="#">AP000997.2</a>  | <a href="#">2.210531569</a>  | <a href="#">5.33x10<sup>-09</sup></a> | <a href="#">8.46x10<sup>-08</sup></a> |
| <a href="#">533</a> | <a href="#">LINC02152</a>   | <a href="#">3.84199883</a>   | <a href="#">5.37x10<sup>-09</sup></a> | <a href="#">8.52x10<sup>-08</sup></a> |
| <a href="#">534</a> | <a href="#">LINC02377</a>   | <a href="#">3.963370414</a>  | <a href="#">5.46x10<sup>-09</sup></a> | <a href="#">8.65x10<sup>-08</sup></a> |
| <a href="#">535</a> | <a href="#">LINC00973</a>   | <a href="#">6.646601264</a>  | <a href="#">5.51x10<sup>-09</sup></a> | <a href="#">8.71x10<sup>-08</sup></a> |
| <a href="#">536</a> | <a href="#">AC099673.1</a>  | <a href="#">4.968108928</a>  | <a href="#">5.69x10<sup>-09</sup></a> | <a href="#">8.99x10<sup>-08</sup></a> |
| <a href="#">537</a> | <a href="#">HNF1A-AS1</a>   | <a href="#">2.901887074</a>  | <a href="#">5.75x10<sup>-09</sup></a> | <a href="#">9.05x10<sup>-08</sup></a> |
| <a href="#">538</a> | <a href="#">LINC02454</a>   | <a href="#">2.293426489</a>  | <a href="#">5.77x10<sup>-09</sup></a> | <a href="#">9.07x10<sup>-08</sup></a> |
| <a href="#">539</a> | <a href="#">LINC00529</a>   | <a href="#">2.415130225</a>  | <a href="#">5.80x10<sup>-09</sup></a> | <a href="#">9.10x10<sup>-08</sup></a> |
| <a href="#">540</a> | <a href="#">AC005021.1</a>  | <a href="#">2.134511172</a>  | <a href="#">5.93x10<sup>-09</sup></a> | <a href="#">9.30x10<sup>-08</sup></a> |
| <a href="#">541</a> | <a href="#">AL589182.1</a>  | <a href="#">5.872704908</a>  | <a href="#">6.13x10<sup>-09</sup></a> | <a href="#">9.57x10<sup>-08</sup></a> |
| <a href="#">542</a> | <a href="#">MIR548XHG</a>   | <a href="#">6.957910158</a>  | <a href="#">6.46x10<sup>-09</sup></a> | <a href="#">1.01x10<sup>-07</sup></a> |
| <a href="#">543</a> | <a href="#">ADAMTS9-AS1</a> | <a href="#">-2.490095391</a> | <a href="#">6.69x10<sup>-09</sup></a> | <a href="#">1.04x10<sup>-07</sup></a> |
| <a href="#">544</a> | <a href="#">LINC01288</a>   | <a href="#">4.555637957</a>  | <a href="#">6.85x10<sup>-09</sup></a> | <a href="#">1.06x10<sup>-07</sup></a> |
| <a href="#">545</a> | <a href="#">AP000696.1</a>  | <a href="#">3.157027961</a>  | <a href="#">6.97x10<sup>-09</sup></a> | <a href="#">1.08x10<sup>-07</sup></a> |
| <a href="#">546</a> | <a href="#">LINC02109</a>   | <a href="#">4.927489975</a>  | <a href="#">7.04x10<sup>-09</sup></a> | <a href="#">1.09x10<sup>-07</sup></a> |
| <a href="#">547</a> | <a href="#">LINC02398</a>   | <a href="#">3.052735378</a>  | <a href="#">7.25x10<sup>-09</sup></a> | <a href="#">1.12x10<sup>-07</sup></a> |
| <a href="#">548</a> | <a href="#">AL160271.1</a>  | <a href="#">7.471270602</a>  | <a href="#">7.43x10<sup>-09</sup></a> | <a href="#">1.14x10<sup>-07</sup></a> |
| <a href="#">549</a> | <a href="#">KIRREL3-AS1</a> | <a href="#">2.107988046</a>  | <a href="#">7.54x10<sup>-09</sup></a> | <a href="#">1.16x10<sup>-07</sup></a> |
| <a href="#">550</a> | <a href="#">PAX8-AS1</a>    | <a href="#">2.286091611</a>  | <a href="#">7.70x10<sup>-09</sup></a> | <a href="#">1.18x10<sup>-07</sup></a> |
| <a href="#">551</a> | <a href="#">DSCAM-AS1</a>   | <a href="#">8.966346916</a>  | <a href="#">7.87x10<sup>-09</sup></a> | <a href="#">1.21x10<sup>-07</sup></a> |
| <a href="#">552</a> | <a href="#">LINC01468</a>   | <a href="#">6.293303854</a>  | <a href="#">8.02x10<sup>-09</sup></a> | <a href="#">1.23x10<sup>-07</sup></a> |
| <a href="#">553</a> | <a href="#">LINC01827</a>   | <a href="#">-2.169144152</a> | <a href="#">8.12x10<sup>-09</sup></a> | <a href="#">1.24x10<sup>-07</sup></a> |
| <a href="#">554</a> | <a href="#">AC024592.2</a>  | <a href="#">2.703959837</a>  | <a href="#">8.63x10<sup>-09</sup></a> | <a href="#">1.31x10<sup>-07</sup></a> |
| <a href="#">555</a> | <a href="#">AC016168.1</a>  | <a href="#">4.418133363</a>  | <a href="#">8.98x10<sup>-09</sup></a> | <a href="#">1.36x10<sup>-07</sup></a> |

|            |                   |                     |                              |                              |
|------------|-------------------|---------------------|------------------------------|------------------------------|
| <u>556</u> | <u>LINC02475</u>  | <u>4.021961568</u>  | <u>9.06x10<sup>-09</sup></u> | <u>1.37x10<sup>-07</sup></u> |
| <u>557</u> | <u>AL008638.3</u> | <u>3.261543967</u>  | <u>9.14x10<sup>-09</sup></u> | <u>1.38x10<sup>-07</sup></u> |
| <u>558</u> | <u>LINC02418</u>  | <u>8.177684383</u>  | <u>9.26x10<sup>-09</sup></u> | <u>1.39x10<sup>-07</sup></u> |
| <u>559</u> | <u>AC021079.1</u> | <u>5.415683862</u>  | <u>9.41x10<sup>-09</sup></u> | <u>1.41x10<sup>-07</sup></u> |
| <u>560</u> | <u>LINC00221</u>  | <u>5.41690401</u>   | <u>9.49x10<sup>-09</sup></u> | <u>1.42x10<sup>-07</sup></u> |
| <u>561</u> | <u>AC008496.2</u> | <u>5.260330925</u>  | <u>9.48x10<sup>-09</sup></u> | <u>1.42x10<sup>-07</sup></u> |
| <u>562</u> | <u>AC090164.3</u> | <u>4.75374939</u>   | <u>9.48x10<sup>-09</sup></u> | <u>1.42x10<sup>-07</sup></u> |
| <u>563</u> | <u>AL356432.7</u> | <u>2.977505954</u>  | <u>9.51x10<sup>-09</sup></u> | <u>1.42x10<sup>-07</sup></u> |
| <u>564</u> | <u>LINC01687</u>  | <u>5.414946269</u>  | <u>9.65x10<sup>-09</sup></u> | <u>1.44x10<sup>-07</sup></u> |
| <u>565</u> | <u>LINC01926</u>  | <u>4.358402642</u>  | <u>9.84x10<sup>-09</sup></u> | <u>1.46x10<sup>-07</sup></u> |
| <u>566</u> | <u>AC141930.1</u> | <u>2.826695735</u>  | <u>9.90x10<sup>-09</sup></u> | <u>1.47x10<sup>-07</sup></u> |
| <u>567</u> | <u>AC008063.2</u> | <u>3.678962809</u>  | <u>1.01x10<sup>-08</sup></u> | <u>1.49x10<sup>-07</sup></u> |
| <u>568</u> | <u>DOCK9-AS1</u>  | <u>3.796462349</u>  | <u>1.01x10<sup>-08</sup></u> | <u>1.50x10<sup>-07</sup></u> |
| <u>569</u> | <u>AC090833.1</u> | <u>4.093289653</u>  | <u>1.06x10<sup>-08</sup></u> | <u>1.57x10<sup>-07</sup></u> |
| <u>570</u> | <u>AC104445.1</u> | <u>-2.175507749</u> | <u>1.07x10<sup>-08</sup></u> | <u>1.57x10<sup>-07</sup></u> |
| <u>571</u> | <u>AC079209.2</u> | <u>2.990909103</u>  | <u>1.08x10<sup>-08</sup></u> | <u>1.59x10<sup>-07</sup></u> |
| <u>572</u> | <u>AC138360.1</u> | <u>2.800581648</u>  | <u>1.10x10<sup>-08</sup></u> | <u>1.62x10<sup>-07</sup></u> |
| <u>573</u> | <u>AC012378.1</u> | <u>-2.04143576</u>  | <u>1.10x10<sup>-08</sup></u> | <u>1.62x10<sup>-07</sup></u> |
| <u>574</u> | <u>AL590644.1</u> | <u>6.175928055</u>  | <u>1.11x10<sup>-08</sup></u> | <u>1.63x10<sup>-07</sup></u> |
| <u>575</u> | <u>AC107398.3</u> | <u>3.023199219</u>  | <u>1.12x10<sup>-08</sup></u> | <u>1.64x10<sup>-07</sup></u> |
| <u>576</u> | <u>AC130352.1</u> | <u>2.483557786</u>  | <u>1.13x10<sup>-08</sup></u> | <u>1.65x10<sup>-07</sup></u> |
| <u>577</u> | <u>AP000542.2</u> | <u>5.881087284</u>  | <u>1.15x10<sup>-08</sup></u> | <u>1.68x10<sup>-07</sup></u> |
| <u>578</u> | <u>AP000547.2</u> | <u>-2.203019924</u> | <u>1.18x10<sup>-08</sup></u> | <u>1.72x10<sup>-07</sup></u> |
| <u>579</u> | <u>LINC01981</u>  | <u>2.077093532</u>  | <u>1.21x10<sup>-08</sup></u> | <u>1.76x10<sup>-07</sup></u> |
| <u>580</u> | <u>LINC02030</u>  | <u>2.958703577</u>  | <u>1.22x10<sup>-08</sup></u> | <u>1.78x10<sup>-07</sup></u> |
| <u>581</u> | <u>AC010343.3</u> | <u>4.565480224</u>  | <u>1.24x10<sup>-08</sup></u> | <u>1.79x10<sup>-07</sup></u> |
| <u>582</u> | <u>AC008805.2</u> | <u>2.91011107</u>   | <u>1.26x10<sup>-08</sup></u> | <u>1.82x10<sup>-07</sup></u> |
| <u>583</u> | <u>AC013451.1</u> | <u>2.969170126</u>  | <u>1.28x10<sup>-08</sup></u> | <u>1.85x10<sup>-07</sup></u> |

|                     |                            |                              |                                       |                                       |
|---------------------|----------------------------|------------------------------|---------------------------------------|---------------------------------------|
| <a href="#">584</a> | <a href="#">AC087477.3</a> | <a href="#">4.813097079</a>  | <a href="#">1.32x10<sup>-08</sup></a> | <a href="#">1.91x10<sup>-07</sup></a> |
| <a href="#">585</a> | <a href="#">AC110015.1</a> | <a href="#">3.431498341</a>  | <a href="#">1.33x10<sup>-08</sup></a> | <a href="#">1.91x10<sup>-07</sup></a> |
| <a href="#">586</a> | <a href="#">LINC01608</a>  | <a href="#">3.828045934</a>  | <a href="#">1.37x10<sup>-08</sup></a> | <a href="#">1.97x10<sup>-07</sup></a> |
| <a href="#">587</a> | <a href="#">AC016576.1</a> | <a href="#">4.861456864</a>  | <a href="#">1.40x10<sup>-08</sup></a> | <a href="#">2.00x10<sup>-07</sup></a> |
| <a href="#">588</a> | <a href="#">AC009505.1</a> | <a href="#">2.307592758</a>  | <a href="#">1.40x10<sup>-08</sup></a> | <a href="#">2.00x10<sup>-07</sup></a> |
| <a href="#">589</a> | <a href="#">AC245041.2</a> | <a href="#">-2.372629009</a> | <a href="#">1.40x10<sup>-08</sup></a> | <a href="#">2.00x10<sup>-07</sup></a> |
| <a href="#">590</a> | <a href="#">AC087379.2</a> | <a href="#">2.433305519</a>  | <a href="#">1.44x10<sup>-08</sup></a> | <a href="#">2.06x10<sup>-07</sup></a> |
| <a href="#">591</a> | <a href="#">AL772155.1</a> | <a href="#">3.224935923</a>  | <a href="#">1.46x10<sup>-08</sup></a> | <a href="#">2.08x10<sup>-07</sup></a> |
| <a href="#">592</a> | <a href="#">LINC00518</a>  | <a href="#">2.251392988</a>  | <a href="#">1.46x10<sup>-08</sup></a> | <a href="#">2.08x10<sup>-07</sup></a> |
| <a href="#">593</a> | <a href="#">AC009065.2</a> | <a href="#">4.077091126</a>  | <a href="#">1.47x10<sup>-08</sup></a> | <a href="#">2.09x10<sup>-07</sup></a> |
| <a href="#">594</a> | <a href="#">AL157402.2</a> | <a href="#">2.444117302</a>  | <a href="#">1.47x10<sup>-08</sup></a> | <a href="#">2.09x10<sup>-07</sup></a> |
| <a href="#">595</a> | <a href="#">AP002833.2</a> | <a href="#">4.566423517</a>  | <a href="#">1.49x10<sup>-08</sup></a> | <a href="#">2.12x10<sup>-07</sup></a> |
| <a href="#">596</a> | <a href="#">AC116563.1</a> | <a href="#">2.95751065</a>   | <a href="#">1.51x10<sup>-08</sup></a> | <a href="#">2.13x10<sup>-07</sup></a> |
| <a href="#">597</a> | <a href="#">CPS1-IT1</a>   | <a href="#">5.317146911</a>  | <a href="#">1.51x10<sup>-08</sup></a> | <a href="#">2.14x10<sup>-07</sup></a> |
| <a href="#">598</a> | <a href="#">AC004485.1</a> | <a href="#">3.811226633</a>  | <a href="#">1.54x10<sup>-08</sup></a> | <a href="#">2.18x10<sup>-07</sup></a> |
| <a href="#">599</a> | <a href="#">AL645608.5</a> | <a href="#">3.086543036</a>  | <a href="#">1.59x10<sup>-08</sup></a> | <a href="#">2.25x10<sup>-07</sup></a> |
| <a href="#">600</a> | <a href="#">AC010307.4</a> | <a href="#">3.45195909</a>   | <a href="#">1.60x10<sup>-08</sup></a> | <a href="#">2.26x10<sup>-07</sup></a> |
| <a href="#">601</a> | <a href="#">AL606970.2</a> | <a href="#">2.870732743</a>  | <a href="#">1.60x10<sup>-08</sup></a> | <a href="#">2.26x10<sup>-07</sup></a> |
| <a href="#">602</a> | <a href="#">AL391845.2</a> | <a href="#">2.579509015</a>  | <a href="#">1.61x10<sup>-08</sup></a> | <a href="#">2.26x10<sup>-07</sup></a> |
| <a href="#">603</a> | <a href="#">AC103855.1</a> | <a href="#">4.332551403</a>  | <a href="#">1.63x10<sup>-08</sup></a> | <a href="#">2.29x10<sup>-07</sup></a> |
| <a href="#">604</a> | <a href="#">AC112236.1</a> | <a href="#">2.672034957</a>  | <a href="#">1.65x10<sup>-08</sup></a> | <a href="#">2.32x10<sup>-07</sup></a> |
| <a href="#">605</a> | <a href="#">LINC01352</a>  | <a href="#">-2.169496311</a> | <a href="#">1.74x10<sup>-08</sup></a> | <a href="#">2.43x10<sup>-07</sup></a> |
| <a href="#">606</a> | <a href="#">INTS9-AS1</a>  | <a href="#">2.356803066</a>  | <a href="#">1.87x10<sup>-08</sup></a> | <a href="#">2.61x10<sup>-07</sup></a> |
| <a href="#">607</a> | <a href="#">LINC00383</a>  | <a href="#">5.498082621</a>  | <a href="#">1.89x10<sup>-08</sup></a> | <a href="#">2.63x10<sup>-07</sup></a> |
| <a href="#">608</a> | <a href="#">AC024257.1</a> | <a href="#">-2.269665539</a> | <a href="#">1.89x10<sup>-08</sup></a> | <a href="#">2.63x10<sup>-07</sup></a> |
| <a href="#">609</a> | <a href="#">AC110790.1</a> | <a href="#">6.081768919</a>  | <a href="#">1.96x10<sup>-08</sup></a> | <a href="#">2.70x10<sup>-07</sup></a> |
| <a href="#">610</a> | <a href="#">AC087463.1</a> | <a href="#">2.567025178</a>  | <a href="#">1.95x10<sup>-08</sup></a> | <a href="#">2.70x10<sup>-07</sup></a> |
| <a href="#">611</a> | <a href="#">AL121820.1</a> | <a href="#">2.499547838</a>  | <a href="#">1.95x10<sup>-08</sup></a> | <a href="#">2.70x10<sup>-07</sup></a> |

|                     |                            |                              |                                       |                                       |
|---------------------|----------------------------|------------------------------|---------------------------------------|---------------------------------------|
| <a href="#">612</a> | <a href="#">AC019155.3</a> | <a href="#">5.819352506</a>  | <a href="#">2.02x10<sup>-08</sup></a> | <a href="#">2.77x10<sup>-07</sup></a> |
| <a href="#">613</a> | <a href="#">AL049539.1</a> | <a href="#">4.036557592</a>  | <a href="#">2.10x10<sup>-08</sup></a> | <a href="#">2.88x10<sup>-07</sup></a> |
| <a href="#">614</a> | <a href="#">LINC01194</a>  | <a href="#">5.282140968</a>  | <a href="#">2.17x10<sup>-08</sup></a> | <a href="#">2.97x10<sup>-07</sup></a> |
| <a href="#">615</a> | <a href="#">LINC00404</a>  | <a href="#">3.524685269</a>  | <a href="#">2.19x10<sup>-08</sup></a> | <a href="#">3.00x10<sup>-07</sup></a> |
| <a href="#">616</a> | <a href="#">AC020659.1</a> | <a href="#">2.031267461</a>  | <a href="#">2.20x10<sup>-08</sup></a> | <a href="#">3.01x10<sup>-07</sup></a> |
| <a href="#">617</a> | <a href="#">AC106799.3</a> | <a href="#">5.977299852</a>  | <a href="#">2.28x10<sup>-08</sup></a> | <a href="#">3.11x10<sup>-07</sup></a> |
| <a href="#">618</a> | <a href="#">AL024508.2</a> | <a href="#">2.23424487</a>   | <a href="#">2.28x10<sup>-08</sup></a> | <a href="#">3.11x10<sup>-07</sup></a> |
| <a href="#">619</a> | <a href="#">AP000470.1</a> | <a href="#">2.063548608</a>  | <a href="#">2.38x10<sup>-08</sup></a> | <a href="#">3.24x10<sup>-07</sup></a> |
| <a href="#">620</a> | <a href="#">LINC01616</a>  | <a href="#">-2.503603196</a> | <a href="#">2.39x10<sup>-08</sup></a> | <a href="#">3.25x10<sup>-07</sup></a> |
| <a href="#">621</a> | <a href="#">AC003956.1</a> | <a href="#">2.04306255</a>   | <a href="#">2.42x10<sup>-08</sup></a> | <a href="#">3.29x10<sup>-07</sup></a> |
| <a href="#">622</a> | <a href="#">AC025575.1</a> | <a href="#">3.434228657</a>  | <a href="#">2.50x10<sup>-08</sup></a> | <a href="#">3.40x10<sup>-07</sup></a> |
| <a href="#">623</a> | <a href="#">AL160408.4</a> | <a href="#">4.534379243</a>  | <a href="#">2.55x10<sup>-08</sup></a> | <a href="#">3.45x10<sup>-07</sup></a> |
| <a href="#">624</a> | <a href="#">AC008268.1</a> | <a href="#">-2.253022736</a> | <a href="#">2.55x10<sup>-08</sup></a> | <a href="#">3.45x10<sup>-07</sup></a> |
| <a href="#">625</a> | <a href="#">AL133387.2</a> | <a href="#">3.116016721</a>  | <a href="#">2.61x10<sup>-08</sup></a> | <a href="#">3.52x10<sup>-07</sup></a> |
| <a href="#">626</a> | <a href="#">AC022509.3</a> | <a href="#">2.642931211</a>  | <a href="#">2.73x10<sup>-08</sup></a> | <a href="#">3.67x10<sup>-07</sup></a> |
| <a href="#">627</a> | <a href="#">AL354733.1</a> | <a href="#">2.532611269</a>  | <a href="#">2.81x10<sup>-08</sup></a> | <a href="#">3.77x10<sup>-07</sup></a> |
| <a href="#">628</a> | <a href="#">LINC01876</a>  | <a href="#">2.474628138</a>  | <a href="#">2.82x10<sup>-08</sup></a> | <a href="#">3.78x10<sup>-07</sup></a> |
| <a href="#">629</a> | <a href="#">CYMP-AS1</a>   | <a href="#">4.129266513</a>  | <a href="#">2.87x10<sup>-08</sup></a> | <a href="#">3.84x10<sup>-07</sup></a> |
| <a href="#">630</a> | <a href="#">LINC02321</a>  | <a href="#">2.645339564</a>  | <a href="#">2.90x10<sup>-08</sup></a> | <a href="#">3.88x10<sup>-07</sup></a> |
| <a href="#">631</a> | <a href="#">LINC01896</a>  | <a href="#">6.074186094</a>  | <a href="#">2.92x10<sup>-08</sup></a> | <a href="#">3.90x10<sup>-07</sup></a> |
| <a href="#">632</a> | <a href="#">AP003559.1</a> | <a href="#">4.020694907</a>  | <a href="#">2.99x10<sup>-08</sup></a> | <a href="#">3.99x10<sup>-07</sup></a> |
| <a href="#">633</a> | <a href="#">LINC00501</a>  | <a href="#">5.451205489</a>  | <a href="#">3.06x10<sup>-08</sup></a> | <a href="#">4.06x10<sup>-07</sup></a> |
| <a href="#">634</a> | <a href="#">AC136489.1</a> | <a href="#">2.641622908</a>  | <a href="#">3.08x10<sup>-08</sup></a> | <a href="#">4.09x10<sup>-07</sup></a> |
| <a href="#">635</a> | <a href="#">LINC00602</a>  | <a href="#">5.452615497</a>  | <a href="#">3.18x10<sup>-08</sup></a> | <a href="#">4.20x10<sup>-07</sup></a> |
| <a href="#">636</a> | <a href="#">LINC01747</a>  | <a href="#">2.088728721</a>  | <a href="#">3.25x10<sup>-08</sup></a> | <a href="#">4.30x10<sup>-07</sup></a> |
| <a href="#">637</a> | <a href="#">AC010336.3</a> | <a href="#">3.180285437</a>  | <a href="#">3.36x10<sup>-08</sup></a> | <a href="#">4.43x10<sup>-07</sup></a> |
| <a href="#">638</a> | <a href="#">WASIR2</a>     | <a href="#">3.940468861</a>  | <a href="#">3.43x10<sup>-08</sup></a> | <a href="#">4.51x10<sup>-07</sup></a> |
| <a href="#">639</a> | <a href="#">LINC02065</a>  | <a href="#">3.5146951</a>    | <a href="#">3.44x10<sup>-08</sup></a> | <a href="#">4.51x10<sup>-07</sup></a> |

|                     |                             |                              |                                       |                                       |
|---------------------|-----------------------------|------------------------------|---------------------------------------|---------------------------------------|
| <a href="#">640</a> | <a href="#">AP003062.1</a>  | <a href="#">5.357852532</a>  | <a href="#">3.51x10<sup>-08</sup></a> | <a href="#">4.59x10<sup>-07</sup></a> |
| <a href="#">641</a> | <a href="#">AP003174.1</a>  | <a href="#">4.204416231</a>  | <a href="#">3.57x10<sup>-08</sup></a> | <a href="#">4.66x10<sup>-07</sup></a> |
| <a href="#">642</a> | <a href="#">AC087783.1</a>  | <a href="#">3.068058489</a>  | <a href="#">3.58x10<sup>-08</sup></a> | <a href="#">4.67x10<sup>-07</sup></a> |
| <a href="#">643</a> | <a href="#">SLC8A1-AS1</a>  | <a href="#">2.196319219</a>  | <a href="#">3.62x10<sup>-08</sup></a> | <a href="#">4.71x10<sup>-07</sup></a> |
| <a href="#">644</a> | <a href="#">AL022337.2</a>  | <a href="#">4.248533498</a>  | <a href="#">3.66x10<sup>-08</sup></a> | <a href="#">4.75x10<sup>-07</sup></a> |
| <a href="#">645</a> | <a href="#">LINC01969</a>   | <a href="#">3.963099165</a>  | <a href="#">3.65x10<sup>-08</sup></a> | <a href="#">4.75x10<sup>-07</sup></a> |
| <a href="#">646</a> | <a href="#">AP001574.1</a>  | <a href="#">2.197584637</a>  | <a href="#">3.68x10<sup>-08</sup></a> | <a href="#">4.78x10<sup>-07</sup></a> |
| <a href="#">647</a> | <a href="#">RNF144A-AS1</a> | <a href="#">2.309734658</a>  | <a href="#">3.72x10<sup>-08</sup></a> | <a href="#">4.81x10<sup>-07</sup></a> |
| <a href="#">648</a> | <a href="#">AP002478.1</a>  | <a href="#">2.365724886</a>  | <a href="#">3.73x10<sup>-08</sup></a> | <a href="#">4.82x10<sup>-07</sup></a> |
| <a href="#">649</a> | <a href="#">LINC00628</a>   | <a href="#">4.032391881</a>  | <a href="#">3.93x10<sup>-08</sup></a> | <a href="#">5.07x10<sup>-07</sup></a> |
| <a href="#">650</a> | <a href="#">AC117386.2</a>  | <a href="#">5.06772806</a>   | <a href="#">3.94x10<sup>-08</sup></a> | <a href="#">5.08x10<sup>-07</sup></a> |
| <a href="#">651</a> | <a href="#">AC244153.1</a>  | <a href="#">-2.190534519</a> | <a href="#">3.95x10<sup>-08</sup></a> | <a href="#">5.09x10<sup>-07</sup></a> |
| <a href="#">652</a> | <a href="#">AP000919.3</a>  | <a href="#">2.531643783</a>  | <a href="#">4.17x10<sup>-08</sup></a> | <a href="#">5.36x10<sup>-07</sup></a> |
| <a href="#">653</a> | <a href="#">AC233263.6</a>  | <a href="#">2.413737722</a>  | <a href="#">4.29x10<sup>-08</sup></a> | <a href="#">5.49x10<sup>-07</sup></a> |
| <a href="#">654</a> | <a href="#">LINC01946</a>   | <a href="#">3.253846626</a>  | <a href="#">4.48x10<sup>-08</sup></a> | <a href="#">5.72x10<sup>-07</sup></a> |
| <a href="#">655</a> | <a href="#">AP000317.2</a>  | <a href="#">2.368812791</a>  | <a href="#">4.55x10<sup>-08</sup></a> | <a href="#">5.81x10<sup>-07</sup></a> |
| <a href="#">656</a> | <a href="#">LINC01655</a>   | <a href="#">2.199982816</a>  | <a href="#">4.56x10<sup>-08</sup></a> | <a href="#">5.81x10<sup>-07</sup></a> |
| <a href="#">657</a> | <a href="#">AC022784.1</a>  | <a href="#">4.799277812</a>  | <a href="#">4.62x10<sup>-08</sup></a> | <a href="#">5.88x10<sup>-07</sup></a> |
| <a href="#">658</a> | <a href="#">PCAT29</a>      | <a href="#">2.355159875</a>  | <a href="#">4.63x10<sup>-08</sup></a> | <a href="#">5.88x10<sup>-07</sup></a> |
| <a href="#">659</a> | <a href="#">LINC01707</a>   | <a href="#">3.0137371</a>    | <a href="#">4.67x10<sup>-08</sup></a> | <a href="#">5.93x10<sup>-07</sup></a> |
| <a href="#">660</a> | <a href="#">AL731897.1</a>  | <a href="#">3.61827398</a>   | <a href="#">4.75x10<sup>-08</sup></a> | <a href="#">6.03x10<sup>-07</sup></a> |
| <a href="#">661</a> | <a href="#">PKP4-AS1</a>    | <a href="#">2.593215932</a>  | <a href="#">4.86x10<sup>-08</sup></a> | <a href="#">6.15x10<sup>-07</sup></a> |
| <a href="#">662</a> | <a href="#">LINC01214</a>   | <a href="#">5.420384146</a>  | <a href="#">4.88x10<sup>-08</sup></a> | <a href="#">6.16x10<sup>-07</sup></a> |
| <a href="#">663</a> | <a href="#">AC010974.1</a>  | <a href="#">2.955306311</a>  | <a href="#">4.88x10<sup>-08</sup></a> | <a href="#">6.16x10<sup>-07</sup></a> |
| <a href="#">664</a> | <a href="#">AL117192.1</a>  | <a href="#">-2.019660659</a> | <a href="#">4.90x10<sup>-08</sup></a> | <a href="#">6.18x10<sup>-07</sup></a> |
| <a href="#">665</a> | <a href="#">AC008736.2</a>  | <a href="#">2.277970973</a>  | <a href="#">4.97x10<sup>-08</sup></a> | <a href="#">6.26x10<sup>-07</sup></a> |
| <a href="#">666</a> | <a href="#">AP003031.1</a>  | <a href="#">2.919440976</a>  | <a href="#">5.00x10<sup>-08</sup></a> | <a href="#">6.29x10<sup>-07</sup></a> |
| <a href="#">667</a> | <a href="#">LINC01667</a>   | <a href="#">7.364243931</a>  | <a href="#">5.19x10<sup>-08</sup></a> | <a href="#">6.50x10<sup>-07</sup></a> |



|                     |                            |                              |                                       |                                       |
|---------------------|----------------------------|------------------------------|---------------------------------------|---------------------------------------|
| <a href="#">668</a> | <a href="#">AC095030.1</a> | <a href="#">3.348755048</a>  | <a href="#">5.22x10<sup>-08</sup></a> | <a href="#">6.53x10<sup>-07</sup></a> |
| <a href="#">669</a> | <a href="#">AC055717.2</a> | <a href="#">2.679472768</a>  | <a href="#">5.22x10<sup>-08</sup></a> | <a href="#">6.53x10<sup>-07</sup></a> |
| <a href="#">670</a> | <a href="#">AC092675.1</a> | <a href="#">2.043688481</a>  | <a href="#">5.38x10<sup>-08</sup></a> | <a href="#">6.72x10<sup>-07</sup></a> |
| <a href="#">671</a> | <a href="#">LINC00898</a>  | <a href="#">5.486118373</a>  | <a href="#">5.40x10<sup>-08</sup></a> | <a href="#">6.74x10<sup>-07</sup></a> |
| <a href="#">672</a> | <a href="#">AC078852.2</a> | <a href="#">2.072967025</a>  | <a href="#">5.40x10<sup>-08</sup></a> | <a href="#">6.74x10<sup>-07</sup></a> |
| <a href="#">673</a> | <a href="#">AC109460.2</a> | <a href="#">2.431726756</a>  | <a href="#">5.59x10<sup>-08</sup></a> | <a href="#">6.95x10<sup>-07</sup></a> |
| <a href="#">674</a> | <a href="#">AC010168.1</a> | <a href="#">2.300210395</a>  | <a href="#">5.60x10<sup>-08</sup></a> | <a href="#">6.95x10<sup>-07</sup></a> |
| <a href="#">675</a> | <a href="#">AC023794.2</a> | <a href="#">3.405755549</a>  | <a href="#">5.68x10<sup>-08</sup></a> | <a href="#">7.05x10<sup>-07</sup></a> |
| <a href="#">676</a> | <a href="#">AL157778.1</a> | <a href="#">4.156107743</a>  | <a href="#">5.79x10<sup>-08</sup></a> | <a href="#">7.18x10<sup>-07</sup></a> |
| <a href="#">677</a> | <a href="#">AC022167.4</a> | <a href="#">2.546745579</a>  | <a href="#">5.84x10<sup>-08</sup></a> | <a href="#">7.23x10<sup>-07</sup></a> |
| <a href="#">678</a> | <a href="#">AC005616.1</a> | <a href="#">-2.019758375</a> | <a href="#">5.85x10<sup>-08</sup></a> | <a href="#">7.24x10<sup>-07</sup></a> |
| <a href="#">679</a> | <a href="#">AL162595.2</a> | <a href="#">2.855719264</a>  | <a href="#">5.88x10<sup>-08</sup></a> | <a href="#">7.27x10<sup>-07</sup></a> |
| <a href="#">680</a> | <a href="#">AC122710.3</a> | <a href="#">3.758413811</a>  | <a href="#">6.09x10<sup>-08</sup></a> | <a href="#">7.50x10<sup>-07</sup></a> |
| <a href="#">681</a> | <a href="#">LINC01703</a>  | <a href="#">2.388088315</a>  | <a href="#">6.13x10<sup>-08</sup></a> | <a href="#">7.54x10<sup>-07</sup></a> |
| <a href="#">682</a> | <a href="#">AL034376.1</a> | <a href="#">2.192189033</a>  | <a href="#">6.17x10<sup>-08</sup></a> | <a href="#">7.59x10<sup>-07</sup></a> |
| <a href="#">683</a> | <a href="#">AC112722.1</a> | <a href="#">-2.150593441</a> | <a href="#">6.20x10<sup>-08</sup></a> | <a href="#">7.62x10<sup>-07</sup></a> |
| <a href="#">684</a> | <a href="#">LINC01776</a>  | <a href="#">3.907554181</a>  | <a href="#">6.23x10<sup>-08</sup></a> | <a href="#">7.65x10<sup>-07</sup></a> |
| <a href="#">685</a> | <a href="#">UCA1</a>       | <a href="#">6.138463462</a>  | <a href="#">6.29x10<sup>-08</sup></a> | <a href="#">7.71x10<sup>-07</sup></a> |
| <a href="#">686</a> | <a href="#">AC090572.3</a> | <a href="#">3.025528607</a>  | <a href="#">6.35x10<sup>-08</sup></a> | <a href="#">7.77x10<sup>-07</sup></a> |
| <a href="#">687</a> | <a href="#">AC023908.1</a> | <a href="#">3.93677399</a>   | <a href="#">6.46x10<sup>-08</sup></a> | <a href="#">7.89x10<sup>-07</sup></a> |
| <a href="#">688</a> | <a href="#">AC007406.2</a> | <a href="#">4.11462777</a>   | <a href="#">6.48x10<sup>-08</sup></a> | <a href="#">7.91x10<sup>-07</sup></a> |
| <a href="#">689</a> | <a href="#">FER1L6-AS2</a> | <a href="#">5.588946822</a>  | <a href="#">6.52x10<sup>-08</sup></a> | <a href="#">7.94x10<sup>-07</sup></a> |
| <a href="#">690</a> | <a href="#">AC024230.1</a> | <a href="#">3.241994169</a>  | <a href="#">6.54x10<sup>-08</sup></a> | <a href="#">7.96x10<sup>-07</sup></a> |
| <a href="#">691</a> | <a href="#">AC034154.1</a> | <a href="#">2.749909119</a>  | <a href="#">6.62x10<sup>-08</sup></a> | <a href="#">8.04x10<sup>-07</sup></a> |
| <a href="#">692</a> | <a href="#">LINC00644</a>  | <a href="#">-2.071645887</a> | <a href="#">6.69x10<sup>-08</sup></a> | <a href="#">8.12x10<sup>-07</sup></a> |
| <a href="#">693</a> | <a href="#">AC079062.1</a> | <a href="#">6.272605628</a>  | <a href="#">6.95x10<sup>-08</sup></a> | <a href="#">8.41x10<sup>-07</sup></a> |
| <a href="#">694</a> | <a href="#">AC109464.3</a> | <a href="#">2.888251112</a>  | <a href="#">6.98x10<sup>-08</sup></a> | <a href="#">8.44x10<sup>-07</sup></a> |
| <a href="#">695</a> | <a href="#">AL109954.2</a> | <a href="#">4.766919604</a>  | <a href="#">7.03x10<sup>-08</sup></a> | <a href="#">8.48x10<sup>-07</sup></a> |

|                     |                               |                              |                                       |                                       |
|---------------------|-------------------------------|------------------------------|---------------------------------------|---------------------------------------|
| <a href="#">696</a> | <a href="#">AC026336.3</a>    | <a href="#">6.393798955</a>  | <a href="#">7.16x10<sup>-08</sup></a> | <a href="#">8.61x10<sup>-07</sup></a> |
| <a href="#">697</a> | <a href="#">AL353633.1</a>    | <a href="#">3.608120091</a>  | <a href="#">7.15x10<sup>-08</sup></a> | <a href="#">8.61x10<sup>-07</sup></a> |
| <a href="#">698</a> | <a href="#">AC107464.2</a>    | <a href="#">3.083216445</a>  | <a href="#">7.40x10<sup>-08</sup></a> | <a href="#">8.87x10<sup>-07</sup></a> |
| <a href="#">699</a> | <a href="#">AC010307.2</a>    | <a href="#">3.019644804</a>  | <a href="#">7.47x10<sup>-08</sup></a> | <a href="#">8.94x10<sup>-07</sup></a> |
| <a href="#">700</a> | <a href="#">AC069061.2</a>    | <a href="#">5.666365404</a>  | <a href="#">7.53x10<sup>-08</sup></a> | <a href="#">9.00x10<sup>-07</sup></a> |
| <a href="#">701</a> | <a href="#">AC097468.1</a>    | <a href="#">2.157839035</a>  | <a href="#">7.53x10<sup>-08</sup></a> | <a href="#">9.00x10<sup>-07</sup></a> |
| <a href="#">702</a> | <a href="#">LINC02324</a>     | <a href="#">3.72211367</a>   | <a href="#">7.61x10<sup>-08</sup></a> | <a href="#">9.07x10<sup>-07</sup></a> |
| <a href="#">703</a> | <a href="#">CASC9</a>         | <a href="#">5.25742034</a>   | <a href="#">7.66x10<sup>-08</sup></a> | <a href="#">9.12x10<sup>-07</sup></a> |
| <a href="#">704</a> | <a href="#">AC009264.1</a>    | <a href="#">2.65891509</a>   | <a href="#">7.78x10<sup>-08</sup></a> | <a href="#">9.25x10<sup>-07</sup></a> |
| <a href="#">705</a> | <a href="#">LINC01995</a>     | <a href="#">2.647336397</a>  | <a href="#">7.85x10<sup>-08</sup></a> | <a href="#">9.31x10<sup>-07</sup></a> |
| <a href="#">706</a> | <a href="#">AC039056.2</a>    | <a href="#">2.19421321</a>   | <a href="#">7.91x10<sup>-08</sup></a> | <a href="#">9.38x10<sup>-07</sup></a> |
| <a href="#">707</a> | <a href="#">AC008649.1</a>    | <a href="#">2.482370337</a>  | <a href="#">7.95x10<sup>-08</sup></a> | <a href="#">9.41x10<sup>-07</sup></a> |
| <a href="#">708</a> | <a href="#">AL157931.1</a>    | <a href="#">3.969883738</a>  | <a href="#">8.02x10<sup>-08</sup></a> | <a href="#">9.47x10<sup>-07</sup></a> |
| <a href="#">709</a> | <a href="#">AL357033.2</a>    | <a href="#">2.269986115</a>  | <a href="#">8.04x10<sup>-08</sup></a> | <a href="#">9.49x10<sup>-07</sup></a> |
| <a href="#">710</a> | <a href="#">LINC01765</a>     | <a href="#">-2.305858715</a> | <a href="#">8.06x10<sup>-08</sup></a> | <a href="#">9.49x10<sup>-07</sup></a> |
| <a href="#">711</a> | <a href="#">SMIM10L2B-AS1</a> | <a href="#">3.047231439</a>  | <a href="#">8.15x10<sup>-08</sup></a> | <a href="#">9.57x10<sup>-07</sup></a> |
| <a href="#">712</a> | <a href="#">HAR1B</a>         | <a href="#">4.015182817</a>  | <a href="#">8.19x10<sup>-08</sup></a> | <a href="#">9.61x10<sup>-07</sup></a> |
| <a href="#">713</a> | <a href="#">AC010327.3</a>    | <a href="#">2.604111288</a>  | <a href="#">8.20x10<sup>-08</sup></a> | <a href="#">9.61x10<sup>-07</sup></a> |
| <a href="#">714</a> | <a href="#">AC015923.1</a>    | <a href="#">2.701207041</a>  | <a href="#">8.22x10<sup>-08</sup></a> | <a href="#">9.63x10<sup>-07</sup></a> |
| <a href="#">715</a> | <a href="#">DRAIC</a>         | <a href="#">4.16378996</a>   | <a href="#">8.27x10<sup>-08</sup></a> | <a href="#">9.66x10<sup>-07</sup></a> |
| <a href="#">716</a> | <a href="#">AC011239.1</a>    | <a href="#">2.480214927</a>  | <a href="#">8.56x10<sup>-08</sup></a> | <a href="#">9.98x10<sup>-07</sup></a> |
| <a href="#">717</a> | <a href="#">AC073094.1</a>    | <a href="#">3.489506897</a>  | <a href="#">8.67x10<sup>-08</sup></a> | <a href="#">1.01x10<sup>-06</sup></a> |
| <a href="#">718</a> | <a href="#">AC079340.2</a>    | <a href="#">3.347271795</a>  | <a href="#">8.75x10<sup>-08</sup></a> | <a href="#">1.02x10<sup>-06</sup></a> |
| <a href="#">719</a> | <a href="#">LINC00615</a>     | <a href="#">2.247595007</a>  | <a href="#">8.75x10<sup>-08</sup></a> | <a href="#">1.02x10<sup>-06</sup></a> |
| <a href="#">720</a> | <a href="#">LINC00887</a>     | <a href="#">4.250966256</a>  | <a href="#">9.02x10<sup>-08</sup></a> | <a href="#">1.05x10<sup>-06</sup></a> |
| <a href="#">721</a> | <a href="#">AL352984.1</a>    | <a href="#">4.041779425</a>  | <a href="#">9.35x10<sup>-08</sup></a> | <a href="#">1.08x10<sup>-06</sup></a> |
| <a href="#">722</a> | <a href="#">AL590302.2</a>    | <a href="#">-2.005889793</a> | <a href="#">9.48x10<sup>-08</sup></a> | <a href="#">1.09x10<sup>-06</sup></a> |
| <a href="#">723</a> | <a href="#">AC007285.2</a>    | <a href="#">2.787392967</a>  | <a href="#">9.62x10<sup>-08</sup></a> | <a href="#">1.11x10<sup>-06</sup></a> |

|                     |                            |                              |                                       |                                       |
|---------------------|----------------------------|------------------------------|---------------------------------------|---------------------------------------|
| <a href="#">724</a> | <a href="#">LINC02471</a>  | <a href="#">-2.036714084</a> | <a href="#">9.64x10<sup>-08</sup></a> | <a href="#">1.11x10<sup>-06</sup></a> |
| <a href="#">725</a> | <a href="#">LINC01811</a>  | <a href="#">-2.145871648</a> | <a href="#">9.59x10<sup>-08</sup></a> | <a href="#">1.11x10<sup>-06</sup></a> |
| <a href="#">726</a> | <a href="#">AC009646.2</a> | <a href="#">3.00744457</a>   | <a href="#">9.74x10<sup>-08</sup></a> | <a href="#">1.12x10<sup>-06</sup></a> |
| <a href="#">727</a> | <a href="#">AL109976.1</a> | <a href="#">2.108580154</a>  | <a href="#">9.77x10<sup>-08</sup></a> | <a href="#">1.12x10<sup>-06</sup></a> |
| <a href="#">728</a> | <a href="#">AC073578.1</a> | <a href="#">4.847434202</a>  | <a href="#">9.87x10<sup>-08</sup></a> | <a href="#">1.13x10<sup>-06</sup></a> |
| <a href="#">729</a> | <a href="#">LINC00588</a>  | <a href="#">2.648669862</a>  | <a href="#">9.96x10<sup>-08</sup></a> | <a href="#">1.14x10<sup>-06</sup></a> |
| <a href="#">730</a> | <a href="#">AC024475.3</a> | <a href="#">2.075265386</a>  | <a href="#">1.00x10<sup>-07</sup></a> | <a href="#">1.15x10<sup>-06</sup></a> |
| <a href="#">731</a> | <a href="#">CASC19</a>     | <a href="#">5.390322067</a>  | <a href="#">1.02x10<sup>-07</sup></a> | <a href="#">1.16x10<sup>-06</sup></a> |
| <a href="#">732</a> | <a href="#">LINC02111</a>  | <a href="#">3.130175623</a>  | <a href="#">1.04x10<sup>-07</sup></a> | <a href="#">1.18x10<sup>-06</sup></a> |
| <a href="#">733</a> | <a href="#">LINC00601</a>  | <a href="#">3.457930156</a>  | <a href="#">1.06x10<sup>-07</sup></a> | <a href="#">1.20x10<sup>-06</sup></a> |
| <a href="#">734</a> | <a href="#">AC100848.1</a> | <a href="#">3.372103638</a>  | <a href="#">1.07x10<sup>-07</sup></a> | <a href="#">1.21x10<sup>-06</sup></a> |
| <a href="#">735</a> | <a href="#">COL4A2-AS1</a> | <a href="#">2.04841575</a>   | <a href="#">1.06x10<sup>-07</sup></a> | <a href="#">1.21x10<sup>-06</sup></a> |
| <a href="#">736</a> | <a href="#">AC239584.1</a> | <a href="#">2.049833953</a>  | <a href="#">1.08x10<sup>-07</sup></a> | <a href="#">1.22x10<sup>-06</sup></a> |
| <a href="#">737</a> | <a href="#">LINC02451</a>  | <a href="#">4.12989085</a>   | <a href="#">1.12x10<sup>-07</sup></a> | <a href="#">1.27x10<sup>-06</sup></a> |
| <a href="#">738</a> | <a href="#">AC067817.2</a> | <a href="#">2.515987954</a>  | <a href="#">1.14x10<sup>-07</sup></a> | <a href="#">1.29x10<sup>-06</sup></a> |
| <a href="#">739</a> | <a href="#">AC114316.2</a> | <a href="#">4.211813011</a>  | <a href="#">1.17x10<sup>-07</sup></a> | <a href="#">1.32x10<sup>-06</sup></a> |
| <a href="#">740</a> | <a href="#">AL161668.2</a> | <a href="#">3.431331936</a>  | <a href="#">1.18x10<sup>-07</sup></a> | <a href="#">1.33x10<sup>-06</sup></a> |
| <a href="#">741</a> | <a href="#">LINC00624</a>  | <a href="#">2.53593821</a>   | <a href="#">1.19x10<sup>-07</sup></a> | <a href="#">1.33x10<sup>-06</sup></a> |
| <a href="#">742</a> | <a href="#">LINC01929</a>  | <a href="#">2.324412142</a>  | <a href="#">1.18x10<sup>-07</sup></a> | <a href="#">1.33x10<sup>-06</sup></a> |
| <a href="#">743</a> | <a href="#">FAM230C</a>    | <a href="#">5.756036348</a>  | <a href="#">1.19x10<sup>-07</sup></a> | <a href="#">1.34x10<sup>-06</sup></a> |
| <a href="#">744</a> | <a href="#">AC112495.1</a> | <a href="#">5.502557487</a>  | <a href="#">1.20x10<sup>-07</sup></a> | <a href="#">1.35x10<sup>-06</sup></a> |
| <a href="#">745</a> | <a href="#">AC025580.1</a> | <a href="#">4.417102294</a>  | <a href="#">1.21x10<sup>-07</sup></a> | <a href="#">1.35x10<sup>-06</sup></a> |
| <a href="#">746</a> | <a href="#">AL589963.1</a> | <a href="#">2.782848021</a>  | <a href="#">1.20x10<sup>-07</sup></a> | <a href="#">1.35x10<sup>-06</sup></a> |
| <a href="#">747</a> | <a href="#">EHMT2-AS1</a>  | <a href="#">2.44224896</a>   | <a href="#">1.20x10<sup>-07</sup></a> | <a href="#">1.35x10<sup>-06</sup></a> |
| <a href="#">748</a> | <a href="#">LINC02474</a>  | <a href="#">5.11959151</a>   | <a href="#">1.21x10<sup>-07</sup></a> | <a href="#">1.36x10<sup>-06</sup></a> |
| <a href="#">749</a> | <a href="#">AC078923.1</a> | <a href="#">4.332527512</a>  | <a href="#">1.24x10<sup>-07</sup></a> | <a href="#">1.38x10<sup>-06</sup></a> |
| <a href="#">750</a> | <a href="#">AP000977.1</a> | <a href="#">2.670967681</a>  | <a href="#">1.23x10<sup>-07</sup></a> | <a href="#">1.38x10<sup>-06</sup></a> |
| <a href="#">751</a> | <a href="#">AC060765.1</a> | <a href="#">2.647869407</a>  | <a href="#">1.24x10<sup>-07</sup></a> | <a href="#">1.38x10<sup>-06</sup></a> |

|                     |                            |                             |                                       |                                       |
|---------------------|----------------------------|-----------------------------|---------------------------------------|---------------------------------------|
| <a href="#">752</a> | <a href="#">AC010139.1</a> | <a href="#">2.867132768</a> | <a href="#">1.26x10<sup>-07</sup></a> | <a href="#">1.40x10<sup>-06</sup></a> |
| <a href="#">753</a> | <a href="#">AP000550.2</a> | <a href="#">2.720343375</a> | <a href="#">1.27x10<sup>-07</sup></a> | <a href="#">1.41x10<sup>-06</sup></a> |
| <a href="#">754</a> | <a href="#">AC131210.1</a> | <a href="#">3.231589362</a> | <a href="#">1.29x10<sup>-07</sup></a> | <a href="#">1.42x10<sup>-06</sup></a> |
| <a href="#">755</a> | <a href="#">AC124290.1</a> | <a href="#">2.825634891</a> | <a href="#">1.28x10<sup>-07</sup></a> | <a href="#">1.42x10<sup>-06</sup></a> |
| <a href="#">756</a> | <a href="#">AL023495.1</a> | <a href="#">2.747735534</a> | <a href="#">1.30x10<sup>-07</sup></a> | <a href="#">1.44x10<sup>-06</sup></a> |
| <a href="#">757</a> | <a href="#">AL162582.1</a> | <a href="#">4.009471715</a> | <a href="#">1.32x10<sup>-07</sup></a> | <a href="#">1.45x10<sup>-06</sup></a> |
| <a href="#">758</a> | <a href="#">AC104699.1</a> | <a href="#">2.652114958</a> | <a href="#">1.31x10<sup>-07</sup></a> | <a href="#">1.45x10<sup>-06</sup></a> |
| <a href="#">759</a> | <a href="#">AC021534.1</a> | <a href="#">5.560474281</a> | <a href="#">1.37x10<sup>-07</sup></a> | <a href="#">1.51x10<sup>-06</sup></a> |
| <a href="#">760</a> | <a href="#">AC087439.1</a> | <a href="#">2.941126329</a> | <a href="#">1.38x10<sup>-07</sup></a> | <a href="#">1.52x10<sup>-06</sup></a> |
| <a href="#">761</a> | <a href="#">MIR5689HG</a>  | <a href="#">2.560377406</a> | <a href="#">1.40x10<sup>-07</sup></a> | <a href="#">1.53x10<sup>-06</sup></a> |
| <a href="#">762</a> | <a href="#">AC078909.2</a> | <a href="#">2.454555337</a> | <a href="#">1.39x10<sup>-07</sup></a> | <a href="#">1.53x10<sup>-06</sup></a> |
| <a href="#">763</a> | <a href="#">AC020611.2</a> | <a href="#">2.420082313</a> | <a href="#">1.44x10<sup>-07</sup></a> | <a href="#">1.57x10<sup>-06</sup></a> |
| <a href="#">764</a> | <a href="#">LINC01444</a>  | <a href="#">2.111249816</a> | <a href="#">1.43x10<sup>-07</sup></a> | <a href="#">1.57x10<sup>-06</sup></a> |
| <a href="#">765</a> | <a href="#">AC108515.1</a> | <a href="#">4.741782431</a> | <a href="#">1.47x10<sup>-07</sup></a> | <a href="#">1.61x10<sup>-06</sup></a> |
| <a href="#">766</a> | <a href="#">AC089984.1</a> | <a href="#">3.426320231</a> | <a href="#">1.50x10<sup>-07</sup></a> | <a href="#">1.64x10<sup>-06</sup></a> |
| <a href="#">767</a> | <a href="#">AF279873.3</a> | <a href="#">5.888062945</a> | <a href="#">1.52x10<sup>-07</sup></a> | <a href="#">1.66x10<sup>-06</sup></a> |
| <a href="#">768</a> | <a href="#">AC005522.2</a> | <a href="#">2.145515022</a> | <a href="#">1.53x10<sup>-07</sup></a> | <a href="#">1.67x10<sup>-06</sup></a> |
| <a href="#">769</a> | <a href="#">AC009312.1</a> | <a href="#">2.945149662</a> | <a href="#">1.57x10<sup>-07</sup></a> | <a href="#">1.70x10<sup>-06</sup></a> |
| <a href="#">770</a> | <a href="#">LINC02444</a>  | <a href="#">2.262998074</a> | <a href="#">1.57x10<sup>-07</sup></a> | <a href="#">1.70x10<sup>-06</sup></a> |
| <a href="#">771</a> | <a href="#">AL162591.3</a> | <a href="#">4.251670432</a> | <a href="#">1.58x10<sup>-07</sup></a> | <a href="#">1.71x10<sup>-06</sup></a> |
| <a href="#">772</a> | <a href="#">LINC02365</a>  | <a href="#">4.118222105</a> | <a href="#">1.59x10<sup>-07</sup></a> | <a href="#">1.71x10<sup>-06</sup></a> |
| <a href="#">773</a> | <a href="#">LINC02318</a>  | <a href="#">4.697555668</a> | <a href="#">1.61x10<sup>-07</sup></a> | <a href="#">1.74x10<sup>-06</sup></a> |
| <a href="#">774</a> | <a href="#">AC008060.1</a> | <a href="#">5.185911695</a> | <a href="#">1.62x10<sup>-07</sup></a> | <a href="#">1.75x10<sup>-06</sup></a> |
| <a href="#">775</a> | <a href="#">KCNQ5-IT1</a>  | <a href="#">4.60021962</a>  | <a href="#">1.63x10<sup>-07</sup></a> | <a href="#">1.75x10<sup>-06</sup></a> |
| <a href="#">776</a> | <a href="#">AL023755.1</a> | <a href="#">3.762120818</a> | <a href="#">1.63x10<sup>-07</sup></a> | <a href="#">1.75x10<sup>-06</sup></a> |
| <a href="#">777</a> | <a href="#">AC098850.3</a> | <a href="#">3.008337672</a> | <a href="#">1.62x10<sup>-07</sup></a> | <a href="#">1.75x10<sup>-06</sup></a> |
| <a href="#">778</a> | <a href="#">ERVMER61-1</a> | <a href="#">6.073406118</a> | <a href="#">1.64x10<sup>-07</sup></a> | <a href="#">1.76x10<sup>-06</sup></a> |
| <a href="#">779</a> | <a href="#">AC004034.1</a> | <a href="#">2.772237137</a> | <a href="#">1.66x10<sup>-07</sup></a> | <a href="#">1.77x10<sup>-06</sup></a> |

|                     |                              |                             |                                       |                                       |
|---------------------|------------------------------|-----------------------------|---------------------------------------|---------------------------------------|
| <a href="#">780</a> | <a href="#">AC109454.3</a>   | <a href="#">4.077033048</a> | <a href="#">1.69x10<sup>-07</sup></a> | <a href="#">1.80x10<sup>-06</sup></a> |
| <a href="#">781</a> | <a href="#">AC015849.5</a>   | <a href="#">4.02073063</a>  | <a href="#">1.68x10<sup>-07</sup></a> | <a href="#">1.80x10<sup>-06</sup></a> |
| <a href="#">782</a> | <a href="#">VPS9D1-AS1</a>   | <a href="#">3.120617267</a> | <a href="#">1.68x10<sup>-07</sup></a> | <a href="#">1.80x10<sup>-06</sup></a> |
| <a href="#">783</a> | <a href="#">AC125603.3</a>   | <a href="#">2.221690717</a> | <a href="#">1.68x10<sup>-07</sup></a> | <a href="#">1.80x10<sup>-06</sup></a> |
| <a href="#">784</a> | <a href="#">AC139491.2</a>   | <a href="#">2.019792862</a> | <a href="#">1.69x10<sup>-07</sup></a> | <a href="#">1.80x10<sup>-06</sup></a> |
| <a href="#">785</a> | <a href="#">LINC01886</a>    | <a href="#">5.611257836</a> | <a href="#">1.72x10<sup>-07</sup></a> | <a href="#">1.82x10<sup>-06</sup></a> |
| <a href="#">786</a> | <a href="#">HOXA11-AS</a>    | <a href="#">4.74939671</a>  | <a href="#">1.72x10<sup>-07</sup></a> | <a href="#">1.82x10<sup>-06</sup></a> |
| <a href="#">787</a> | <a href="#">LINC01665</a>    | <a href="#">4.12304512</a>  | <a href="#">1.78x10<sup>-07</sup></a> | <a href="#">1.89x10<sup>-06</sup></a> |
| <a href="#">788</a> | <a href="#">LINC01731</a>    | <a href="#">3.09721621</a>  | <a href="#">1.80x10<sup>-07</sup></a> | <a href="#">1.90x10<sup>-06</sup></a> |
| <a href="#">789</a> | <a href="#">DNAAF4-CCPG1</a> | <a href="#">2.342027626</a> | <a href="#">1.79x10<sup>-07</sup></a> | <a href="#">1.90x10<sup>-06</sup></a> |
| <a href="#">790</a> | <a href="#">TFAP2A-AS1</a>   | <a href="#">3.637727857</a> | <a href="#">1.82x10<sup>-07</sup></a> | <a href="#">1.92x10<sup>-06</sup></a> |
| <a href="#">791</a> | <a href="#">LINC01021</a>    | <a href="#">4.209931997</a> | <a href="#">1.84x10<sup>-07</sup></a> | <a href="#">1.93x10<sup>-06</sup></a> |
| <a href="#">792</a> | <a href="#">FGF12-AS1</a>    | <a href="#">2.193363112</a> | <a href="#">1.83x10<sup>-07</sup></a> | <a href="#">1.93x10<sup>-06</sup></a> |
| <a href="#">793</a> | <a href="#">AL355596.1</a>   | <a href="#">5.420992467</a> | <a href="#">1.86x10<sup>-07</sup></a> | <a href="#">1.95x10<sup>-06</sup></a> |
| <a href="#">794</a> | <a href="#">AC092447.8</a>   | <a href="#">3.272432023</a> | <a href="#">1.86x10<sup>-07</sup></a> | <a href="#">1.95x10<sup>-06</sup></a> |
| <a href="#">795</a> | <a href="#">LINC01748</a>    | <a href="#">5.111993649</a> | <a href="#">1.92x10<sup>-07</sup></a> | <a href="#">2.01x10<sup>-06</sup></a> |
| <a href="#">796</a> | <a href="#">AC105243.1</a>   | <a href="#">2.920215188</a> | <a href="#">1.92x10<sup>-07</sup></a> | <a href="#">2.01x10<sup>-06</sup></a> |
| <a href="#">797</a> | <a href="#">PWRN2</a>        | <a href="#">3.349691577</a> | <a href="#">1.96x10<sup>-07</sup></a> | <a href="#">2.04x10<sup>-06</sup></a> |
| <a href="#">798</a> | <a href="#">AC104461.1</a>   | <a href="#">2.241608681</a> | <a href="#">2.04x10<sup>-07</sup></a> | <a href="#">2.11x10<sup>-06</sup></a> |
| <a href="#">799</a> | <a href="#">AC011700.1</a>   | <a href="#">4.026994114</a> | <a href="#">2.05x10<sup>-07</sup></a> | <a href="#">2.12x10<sup>-06</sup></a> |
| <a href="#">800</a> | <a href="#">AC003092.1</a>   | <a href="#">5.464807784</a> | <a href="#">2.05x10<sup>-07</sup></a> | <a href="#">2.13x10<sup>-06</sup></a> |
| <a href="#">801</a> | <a href="#">AP001619.1</a>   | <a href="#">2.099784068</a> | <a href="#">2.07x10<sup>-07</sup></a> | <a href="#">2.14x10<sup>-06</sup></a> |
| <a href="#">802</a> | <a href="#">AC012307.1</a>   | <a href="#">2.623979588</a> | <a href="#">2.11x10<sup>-07</sup></a> | <a href="#">2.19x10<sup>-06</sup></a> |
| <a href="#">803</a> | <a href="#">AC003986.3</a>   | <a href="#">2.257820905</a> | <a href="#">2.13x10<sup>-07</sup></a> | <a href="#">2.20x10<sup>-06</sup></a> |
| <a href="#">804</a> | <a href="#">LINC02088</a>    | <a href="#">3.298763033</a> | <a href="#">2.14x10<sup>-07</sup></a> | <a href="#">2.21x10<sup>-06</sup></a> |
| <a href="#">805</a> | <a href="#">KIAA1614-AS1</a> | <a href="#">2.121659268</a> | <a href="#">2.14x10<sup>-07</sup></a> | <a href="#">2.21x10<sup>-06</sup></a> |
| <a href="#">806</a> | <a href="#">AC080023.1</a>   | <a href="#">2.029649301</a> | <a href="#">2.15x10<sup>-07</sup></a> | <a href="#">2.21x10<sup>-06</sup></a> |
| <a href="#">807</a> | <a href="#">AC022733.1</a>   | <a href="#">4.733937023</a> | <a href="#">2.16x10<sup>-07</sup></a> | <a href="#">2.22x10<sup>-06</sup></a> |

|                     |                             |                              |                                       |                                       |
|---------------------|-----------------------------|------------------------------|---------------------------------------|---------------------------------------|
| <a href="#">808</a> | <a href="#">AL391361.3</a>  | <a href="#">5.703442047</a>  | <a href="#">2.18x10<sup>-07</sup></a> | <a href="#">2.24x10<sup>-06</sup></a> |
| <a href="#">809</a> | <a href="#">AL627309.4</a>  | <a href="#">3.1793556</a>    | <a href="#">2.17x10<sup>-07</sup></a> | <a href="#">2.24x10<sup>-06</sup></a> |
| <a href="#">810</a> | <a href="#">AC131274.1</a>  | <a href="#">2.809828227</a>  | <a href="#">2.19x10<sup>-07</sup></a> | <a href="#">2.25x10<sup>-06</sup></a> |
| <a href="#">811</a> | <a href="#">NTM-IT</a>      | <a href="#">2.552899381</a>  | <a href="#">2.20x10<sup>-07</sup></a> | <a href="#">2.26x10<sup>-06</sup></a> |
| <a href="#">812</a> | <a href="#">LINC01597</a>   | <a href="#">4.336751881</a>  | <a href="#">2.22x10<sup>-07</sup></a> | <a href="#">2.27x10<sup>-06</sup></a> |
| <a href="#">813</a> | <a href="#">AC122710.1</a>  | <a href="#">5.935859952</a>  | <a href="#">2.23x10<sup>-07</sup></a> | <a href="#">2.28x10<sup>-06</sup></a> |
| <a href="#">814</a> | <a href="#">AL133284.1</a>  | <a href="#">4.94429929</a>   | <a href="#">2.23x10<sup>-07</sup></a> | <a href="#">2.28x10<sup>-06</sup></a> |
| <a href="#">815</a> | <a href="#">AC011120.1</a>  | <a href="#">2.560320037</a>  | <a href="#">2.23x10<sup>-07</sup></a> | <a href="#">2.28x10<sup>-06</sup></a> |
| <a href="#">816</a> | <a href="#">ANO1-AS2</a>    | <a href="#">3.215355013</a>  | <a href="#">2.26x10<sup>-07</sup></a> | <a href="#">2.31x10<sup>-06</sup></a> |
| <a href="#">817</a> | <a href="#">LINC01297</a>   | <a href="#">4.235775269</a>  | <a href="#">2.38x10<sup>-07</sup></a> | <a href="#">2.42x10<sup>-06</sup></a> |
| <a href="#">818</a> | <a href="#">LINC00645</a>   | <a href="#">4.880074719</a>  | <a href="#">2.41x10<sup>-07</sup></a> | <a href="#">2.45x10<sup>-06</sup></a> |
| <a href="#">819</a> | <a href="#">AC112176.1</a>  | <a href="#">4.045184593</a>  | <a href="#">2.40x10<sup>-07</sup></a> | <a href="#">2.45x10<sup>-06</sup></a> |
| <a href="#">820</a> | <a href="#">LINC01429</a>   | <a href="#">3.370241173</a>  | <a href="#">2.41x10<sup>-07</sup></a> | <a href="#">2.45x10<sup>-06</sup></a> |
| <a href="#">821</a> | <a href="#">AC090502.3</a>  | <a href="#">3.876864189</a>  | <a href="#">2.42x10<sup>-07</sup></a> | <a href="#">2.46x10<sup>-06</sup></a> |
| <a href="#">822</a> | <a href="#">LSAMP-AS1</a>   | <a href="#">3.731350896</a>  | <a href="#">2.43x10<sup>-07</sup></a> | <a href="#">2.46x10<sup>-06</sup></a> |
| <a href="#">823</a> | <a href="#">ARHGEF3-AS1</a> | <a href="#">2.505670303</a>  | <a href="#">2.45x10<sup>-07</sup></a> | <a href="#">2.48x10<sup>-06</sup></a> |
| <a href="#">824</a> | <a href="#">KC877982.1</a>  | <a href="#">5.870298766</a>  | <a href="#">2.48x10<sup>-07</sup></a> | <a href="#">2.50x10<sup>-06</sup></a> |
| <a href="#">825</a> | <a href="#">AC068189.2</a>  | <a href="#">2.491478509</a>  | <a href="#">2.52x10<sup>-07</sup></a> | <a href="#">2.54x10<sup>-06</sup></a> |
| <a href="#">826</a> | <a href="#">AC079070.1</a>  | <a href="#">2.847622024</a>  | <a href="#">2.54x10<sup>-07</sup></a> | <a href="#">2.56x10<sup>-06</sup></a> |
| <a href="#">827</a> | <a href="#">AC003965.2</a>  | <a href="#">2.295010013</a>  | <a href="#">2.55x10<sup>-07</sup></a> | <a href="#">2.56x10<sup>-06</sup></a> |
| <a href="#">828</a> | <a href="#">AC243830.1</a>  | <a href="#">3.639246768</a>  | <a href="#">2.58x10<sup>-07</sup></a> | <a href="#">2.59x10<sup>-06</sup></a> |
| <a href="#">829</a> | <a href="#">AL033397.2</a>  | <a href="#">3.97089958</a>   | <a href="#">2.65x10<sup>-07</sup></a> | <a href="#">2.65x10<sup>-06</sup></a> |
| <a href="#">830</a> | <a href="#">PLS1-AS1</a>    | <a href="#">2.903292595</a>  | <a href="#">2.65x10<sup>-07</sup></a> | <a href="#">2.65x10<sup>-06</sup></a> |
| <a href="#">831</a> | <a href="#">AC068875.1</a>  | <a href="#">-2.084194303</a> | <a href="#">2.66x10<sup>-07</sup></a> | <a href="#">2.66x10<sup>-06</sup></a> |
| <a href="#">832</a> | <a href="#">LINC02048</a>   | <a href="#">3.649287702</a>  | <a href="#">2.68x10<sup>-07</sup></a> | <a href="#">2.68x10<sup>-06</sup></a> |
| <a href="#">833</a> | <a href="#">CASC21</a>      | <a href="#">2.194882009</a>  | <a href="#">2.77x10<sup>-07</sup></a> | <a href="#">2.76x10<sup>-06</sup></a> |
| <a href="#">834</a> | <a href="#">AL022324.3</a>  | <a href="#">4.178670127</a>  | <a href="#">2.85x10<sup>-07</sup></a> | <a href="#">2.84x10<sup>-06</sup></a> |
| <a href="#">835</a> | <a href="#">LINC01842</a>   | <a href="#">3.905006193</a>  | <a href="#">2.85x10<sup>-07</sup></a> | <a href="#">2.84x10<sup>-06</sup></a> |

|                     |                            |                             |                                       |                                       |
|---------------------|----------------------------|-----------------------------|---------------------------------------|---------------------------------------|
| <a href="#">836</a> | <a href="#">MIR130B</a>    | <a href="#">2.535350269</a> | <a href="#">2.86x10<sup>-07</sup></a> | <a href="#">2.84x10<sup>-06</sup></a> |
| <a href="#">837</a> | <a href="#">LINC02320</a>  | <a href="#">2.050385436</a> | <a href="#">2.85x10<sup>-07</sup></a> | <a href="#">2.84x10<sup>-06</sup></a> |
| <a href="#">838</a> | <a href="#">AC125494.3</a> | <a href="#">2.548552798</a> | <a href="#">2.89x10<sup>-07</sup></a> | <a href="#">2.87x10<sup>-06</sup></a> |
| <a href="#">839</a> | <a href="#">AP000553.1</a> | <a href="#">3.610169124</a> | <a href="#">2.92x10<sup>-07</sup></a> | <a href="#">2.90x10<sup>-06</sup></a> |
| <a href="#">840</a> | <a href="#">AC112721.2</a> | <a href="#">3.8440321</a>   | <a href="#">2.95x10<sup>-07</sup></a> | <a href="#">2.93x10<sup>-06</sup></a> |
| <a href="#">841</a> | <a href="#">AC005291.1</a> | <a href="#">2.711880929</a> | <a href="#">2.96x10<sup>-07</sup></a> | <a href="#">2.93x10<sup>-06</sup></a> |
| <a href="#">842</a> | <a href="#">AC027117.2</a> | <a href="#">2.00598381</a>  | <a href="#">3.04x10<sup>-07</sup></a> | <a href="#">3.00x10<sup>-06</sup></a> |
| <a href="#">843</a> | <a href="#">LINC01561</a>  | <a href="#">3.952275678</a> | <a href="#">3.08x10<sup>-07</sup></a> | <a href="#">3.04x10<sup>-06</sup></a> |
| <a href="#">844</a> | <a href="#">AC007529.1</a> | <a href="#">3.349408576</a> | <a href="#">3.15x10<sup>-07</sup></a> | <a href="#">3.11x10<sup>-06</sup></a> |
| <a href="#">845</a> | <a href="#">AC023090.1</a> | <a href="#">3.167289432</a> | <a href="#">3.29x10<sup>-07</sup></a> | <a href="#">3.24x10<sup>-06</sup></a> |
| <a href="#">846</a> | <a href="#">AL596223.1</a> | <a href="#">3.620923397</a> | <a href="#">3.31x10<sup>-07</sup></a> | <a href="#">3.25x10<sup>-06</sup></a> |
| <a href="#">847</a> | <a href="#">AC148477.3</a> | <a href="#">2.806459892</a> | <a href="#">3.30x10<sup>-07</sup></a> | <a href="#">3.25x10<sup>-06</sup></a> |
| <a href="#">848</a> | <a href="#">AP005328.1</a> | <a href="#">3.45658201</a>  | <a href="#">3.33x10<sup>-07</sup></a> | <a href="#">3.27x10<sup>-06</sup></a> |
| <a href="#">849</a> | <a href="#">AL133467.2</a> | <a href="#">4.86456544</a>  | <a href="#">3.35x10<sup>-07</sup></a> | <a href="#">3.28x10<sup>-06</sup></a> |
| <a href="#">850</a> | <a href="#">LINC02037</a>  | <a href="#">4.382815653</a> | <a href="#">3.35x10<sup>-07</sup></a> | <a href="#">3.28x10<sup>-06</sup></a> |
| <a href="#">851</a> | <a href="#">AL445224.1</a> | <a href="#">2.599219669</a> | <a href="#">3.35x10<sup>-07</sup></a> | <a href="#">3.28x10<sup>-06</sup></a> |
| <a href="#">852</a> | <a href="#">LINC01455</a>  | <a href="#">4.057525934</a> | <a href="#">3.38x10<sup>-07</sup></a> | <a href="#">3.30x10<sup>-06</sup></a> |
| <a href="#">853</a> | <a href="#">UFL1-AS1</a>   | <a href="#">2.761426222</a> | <a href="#">3.39x10<sup>-07</sup></a> | <a href="#">3.31x10<sup>-06</sup></a> |
| <a href="#">854</a> | <a href="#">AC097521.1</a> | <a href="#">2.61710007</a>  | <a href="#">3.40x10<sup>-07</sup></a> | <a href="#">3.31x10<sup>-06</sup></a> |
| <a href="#">855</a> | <a href="#">AC025575.2</a> | <a href="#">5.255327927</a> | <a href="#">3.45x10<sup>-07</sup></a> | <a href="#">3.36x10<sup>-06</sup></a> |
| <a href="#">856</a> | <a href="#">AL353807.2</a> | <a href="#">2.264133538</a> | <a href="#">3.45x10<sup>-07</sup></a> | <a href="#">3.36x10<sup>-06</sup></a> |
| <a href="#">857</a> | <a href="#">AC004816.1</a> | <a href="#">3.092935399</a> | <a href="#">3.51x10<sup>-07</sup></a> | <a href="#">3.41x10<sup>-06</sup></a> |
| <a href="#">858</a> | <a href="#">AL512366.1</a> | <a href="#">4.084289827</a> | <a href="#">3.52x10<sup>-07</sup></a> | <a href="#">3.42x10<sup>-06</sup></a> |
| <a href="#">859</a> | <a href="#">ERVH48-1</a>   | <a href="#">5.149538919</a> | <a href="#">3.54x10<sup>-07</sup></a> | <a href="#">3.43x10<sup>-06</sup></a> |
| <a href="#">860</a> | <a href="#">AC090673.1</a> | <a href="#">3.839244628</a> | <a href="#">3.54x10<sup>-07</sup></a> | <a href="#">3.43x10<sup>-06</sup></a> |
| <a href="#">861</a> | <a href="#">AC092683.2</a> | <a href="#">2.711855399</a> | <a href="#">3.63x10<sup>-07</sup></a> | <a href="#">3.51x10<sup>-06</sup></a> |
| <a href="#">862</a> | <a href="#">AC011632.1</a> | <a href="#">5.084429746</a> | <a href="#">3.64x10<sup>-07</sup></a> | <a href="#">3.52x10<sup>-06</sup></a> |
| <a href="#">863</a> | <a href="#">AC107308.1</a> | <a href="#">4.640897137</a> | <a href="#">3.66x10<sup>-07</sup></a> | <a href="#">3.53x10<sup>-06</sup></a> |

|                     |                             |                              |                                       |                                       |
|---------------------|-----------------------------|------------------------------|---------------------------------------|---------------------------------------|
| <a href="#">864</a> | <a href="#">AC090023.2</a>  | <a href="#">4.416107058</a>  | <a href="#">3.69x10<sup>-07</sup></a> | <a href="#">3.56x10<sup>-06</sup></a> |
| <a href="#">865</a> | <a href="#">AC095059.1</a>  | <a href="#">3.937746408</a>  | <a href="#">3.74x10<sup>-07</sup></a> | <a href="#">3.60x10<sup>-06</sup></a> |
| <a href="#">866</a> | <a href="#">AC055716.3</a>  | <a href="#">3.269167249</a>  | <a href="#">3.92x10<sup>-07</sup></a> | <a href="#">3.76x10<sup>-06</sup></a> |
| <a href="#">867</a> | <a href="#">AC105219.2</a>  | <a href="#">3.555525799</a>  | <a href="#">4.01x10<sup>-07</sup></a> | <a href="#">3.82x10<sup>-06</sup></a> |
| <a href="#">868</a> | <a href="#">AC019118.2</a>  | <a href="#">2.136316411</a>  | <a href="#">4.05x10<sup>-07</sup></a> | <a href="#">3.86x10<sup>-06</sup></a> |
| <a href="#">869</a> | <a href="#">AC113615.2</a>  | <a href="#">3.425815058</a>  | <a href="#">4.07x10<sup>-07</sup></a> | <a href="#">3.87x10<sup>-06</sup></a> |
| <a href="#">870</a> | <a href="#">AL160413.1</a>  | <a href="#">-2.203078591</a> | <a href="#">4.11x10<sup>-07</sup></a> | <a href="#">3.90x10<sup>-06</sup></a> |
| <a href="#">871</a> | <a href="#">AC016877.3</a>  | <a href="#">3.704438874</a>  | <a href="#">4.13x10<sup>-07</sup></a> | <a href="#">3.91x10<sup>-06</sup></a> |
| <a href="#">872</a> | <a href="#">KCNQ5-AS1</a>   | <a href="#">2.611017513</a>  | <a href="#">4.12x10<sup>-07</sup></a> | <a href="#">3.91x10<sup>-06</sup></a> |
| <a href="#">873</a> | <a href="#">LINC00525</a>   | <a href="#">3.467566495</a>  | <a href="#">4.20x10<sup>-07</sup></a> | <a href="#">3.97x10<sup>-06</sup></a> |
| <a href="#">874</a> | <a href="#">AC009065.5</a>  | <a href="#">4.252526839</a>  | <a href="#">4.21x10<sup>-07</sup></a> | <a href="#">3.98x10<sup>-06</sup></a> |
| <a href="#">875</a> | <a href="#">AL353803.1</a>  | <a href="#">2.971627471</a>  | <a href="#">4.24x10<sup>-07</sup></a> | <a href="#">3.99x10<sup>-06</sup></a> |
| <a href="#">876</a> | <a href="#">AC005865.1</a>  | <a href="#">3.760955214</a>  | <a href="#">4.27x10<sup>-07</sup></a> | <a href="#">4.02x10<sup>-06</sup></a> |
| <a href="#">877</a> | <a href="#">LUCAT1</a>      | <a href="#">3.742391804</a>  | <a href="#">4.27x10<sup>-07</sup></a> | <a href="#">4.02x10<sup>-06</sup></a> |
| <a href="#">878</a> | <a href="#">AC008875.1</a>  | <a href="#">2.531840275</a>  | <a href="#">4.31x10<sup>-07</sup></a> | <a href="#">4.05x10<sup>-06</sup></a> |
| <a href="#">879</a> | <a href="#">LINC00237</a>   | <a href="#">2.266387208</a>  | <a href="#">4.33x10<sup>-07</sup></a> | <a href="#">4.07x10<sup>-06</sup></a> |
| <a href="#">880</a> | <a href="#">GS1-124K5.4</a> | <a href="#">2.210753135</a>  | <a href="#">4.43x10<sup>-07</sup></a> | <a href="#">4.15x10<sup>-06</sup></a> |
| <a href="#">881</a> | <a href="#">AC246817.2</a>  | <a href="#">3.439467984</a>  | <a href="#">4.46x10<sup>-07</sup></a> | <a href="#">4.18x10<sup>-06</sup></a> |
| <a href="#">882</a> | <a href="#">AL022341.2</a>  | <a href="#">2.002058268</a>  | <a href="#">4.60x10<sup>-07</sup></a> | <a href="#">4.30x10<sup>-06</sup></a> |
| <a href="#">883</a> | <a href="#">AC011752.1</a>  | <a href="#">2.790293014</a>  | <a href="#">4.64x10<sup>-07</sup></a> | <a href="#">4.33x10<sup>-06</sup></a> |
| <a href="#">884</a> | <a href="#">AL513548.1</a>  | <a href="#">4.984691193</a>  | <a href="#">4.65x10<sup>-07</sup></a> | <a href="#">4.34x10<sup>-06</sup></a> |
| <a href="#">885</a> | <a href="#">AC083809.1</a>  | <a href="#">5.073210324</a>  | <a href="#">4.77x10<sup>-07</sup></a> | <a href="#">4.44x10<sup>-06</sup></a> |
| <a href="#">886</a> | <a href="#">AC069277.1</a>  | <a href="#">4.511823006</a>  | <a href="#">4.79x10<sup>-07</sup></a> | <a href="#">4.45x10<sup>-06</sup></a> |
| <a href="#">887</a> | <a href="#">AC091133.2</a>  | <a href="#">3.27704721</a>   | <a href="#">4.87x10<sup>-07</sup></a> | <a href="#">4.52x10<sup>-06</sup></a> |
| <a href="#">888</a> | <a href="#">FLJ12825</a>    | <a href="#">2.579082118</a>  | <a href="#">4.99x10<sup>-07</sup></a> | <a href="#">4.62x10<sup>-06</sup></a> |
| <a href="#">889</a> | <a href="#">LINC00659</a>   | <a href="#">4.445833164</a>  | <a href="#">5.03x10<sup>-07</sup></a> | <a href="#">4.64x10<sup>-06</sup></a> |
| <a href="#">890</a> | <a href="#">AL136987.2</a>  | <a href="#">3.698772555</a>  | <a href="#">5.11x10<sup>-07</sup></a> | <a href="#">4.71x10<sup>-06</sup></a> |
| <a href="#">891</a> | <a href="#">CASC8</a>       | <a href="#">3.655648279</a>  | <a href="#">5.13x10<sup>-07</sup></a> | <a href="#">4.72x10<sup>-06</sup></a> |



|                     |                            |                              |                                       |                                       |
|---------------------|----------------------------|------------------------------|---------------------------------------|---------------------------------------|
| <a href="#">892</a> | <a href="#">ABCA9-AS1</a>  | <a href="#">2.717281099</a>  | <a href="#">5.40x10<sup>-07</sup></a> | <a href="#">4.96x10<sup>-06</sup></a> |
| <a href="#">893</a> | <a href="#">AP005230.1</a> | <a href="#">4.335339296</a>  | <a href="#">5.42x10<sup>-07</sup></a> | <a href="#">4.97x10<sup>-06</sup></a> |
| <a href="#">894</a> | <a href="#">LINC00668</a>  | <a href="#">3.704920781</a>  | <a href="#">5.48x10<sup>-07</sup></a> | <a href="#">5.02x10<sup>-06</sup></a> |
| <a href="#">895</a> | <a href="#">AL606970.3</a> | <a href="#">2.981042511</a>  | <a href="#">5.60x10<sup>-07</sup></a> | <a href="#">5.13x10<sup>-06</sup></a> |
| <a href="#">896</a> | <a href="#">AC117386.1</a> | <a href="#">3.787127207</a>  | <a href="#">5.63x10<sup>-07</sup></a> | <a href="#">5.14x10<sup>-06</sup></a> |
| <a href="#">897</a> | <a href="#">AL590609.3</a> | <a href="#">2.128465655</a>  | <a href="#">5.63x10<sup>-07</sup></a> | <a href="#">5.14x10<sup>-06</sup></a> |
| <a href="#">898</a> | <a href="#">AP001453.2</a> | <a href="#">3.743601193</a>  | <a href="#">5.73x10<sup>-07</sup></a> | <a href="#">5.23x10<sup>-06</sup></a> |
| <a href="#">899</a> | <a href="#">AC005064.1</a> | <a href="#">2.570301974</a>  | <a href="#">5.90x10<sup>-07</sup></a> | <a href="#">5.37x10<sup>-06</sup></a> |
| <a href="#">900</a> | <a href="#">AP002892.2</a> | <a href="#">2.682027215</a>  | <a href="#">5.99x10<sup>-07</sup></a> | <a href="#">5.44x10<sup>-06</sup></a> |
| <a href="#">901</a> | <a href="#">AL034349.1</a> | <a href="#">4.501530143</a>  | <a href="#">6.19x10<sup>-07</sup></a> | <a href="#">5.61x10<sup>-06</sup></a> |
| <a href="#">902</a> | <a href="#">AC069120.1</a> | <a href="#">4.218874298</a>  | <a href="#">6.22x10<sup>-07</sup></a> | <a href="#">5.64x10<sup>-06</sup></a> |
| <a href="#">903</a> | <a href="#">AL391863.2</a> | <a href="#">4.308576405</a>  | <a href="#">6.27x10<sup>-07</sup></a> | <a href="#">5.68x10<sup>-06</sup></a> |
| <a href="#">904</a> | <a href="#">AL021395.1</a> | <a href="#">2.515453699</a>  | <a href="#">6.30x10<sup>-07</sup></a> | <a href="#">5.70x10<sup>-06</sup></a> |
| <a href="#">905</a> | <a href="#">AC090578.1</a> | <a href="#">2.511414096</a>  | <a href="#">6.40x10<sup>-07</sup></a> | <a href="#">5.78x10<sup>-06</sup></a> |
| <a href="#">906</a> | <a href="#">AL611929.1</a> | <a href="#">4.966558399</a>  | <a href="#">6.45x10<sup>-07</sup></a> | <a href="#">5.82x10<sup>-06</sup></a> |
| <a href="#">907</a> | <a href="#">AC034206.1</a> | <a href="#">4.175658233</a>  | <a href="#">6.46x10<sup>-07</sup></a> | <a href="#">5.83x10<sup>-06</sup></a> |
| <a href="#">908</a> | <a href="#">AC099066.2</a> | <a href="#">3.405271259</a>  | <a href="#">6.49x10<sup>-07</sup></a> | <a href="#">5.84x10<sup>-06</sup></a> |
| <a href="#">909</a> | <a href="#">AC099509.1</a> | <a href="#">4.137421205</a>  | <a href="#">6.56x10<sup>-07</sup></a> | <a href="#">5.89x10<sup>-06</sup></a> |
| <a href="#">910</a> | <a href="#">AL512413.1</a> | <a href="#">2.236451595</a>  | <a href="#">6.66x10<sup>-07</sup></a> | <a href="#">5.98x10<sup>-06</sup></a> |
| <a href="#">911</a> | <a href="#">CHODL-AS1</a>  | <a href="#">3.420093744</a>  | <a href="#">6.68x10<sup>-07</sup></a> | <a href="#">5.99x10<sup>-06</sup></a> |
| <a href="#">912</a> | <a href="#">AC108136.1</a> | <a href="#">3.01792373</a>   | <a href="#">6.75x10<sup>-07</sup></a> | <a href="#">6.04x10<sup>-06</sup></a> |
| <a href="#">913</a> | <a href="#">LINC01037</a>  | <a href="#">4.5314429</a>    | <a href="#">6.94x10<sup>-07</sup></a> | <a href="#">6.21x10<sup>-06</sup></a> |
| <a href="#">914</a> | <a href="#">AC069120.3</a> | <a href="#">4.768396388</a>  | <a href="#">7.21x10<sup>-07</sup></a> | <a href="#">6.43x10<sup>-06</sup></a> |
| <a href="#">915</a> | <a href="#">Z93403.1</a>   | <a href="#">2.538484958</a>  | <a href="#">7.20x10<sup>-07</sup></a> | <a href="#">6.43x10<sup>-06</sup></a> |
| <a href="#">916</a> | <a href="#">CR392039.3</a> | <a href="#">4.615210942</a>  | <a href="#">7.23x10<sup>-07</sup></a> | <a href="#">6.45x10<sup>-06</sup></a> |
| <a href="#">917</a> | <a href="#">AL669970.1</a> | <a href="#">2.379235528</a>  | <a href="#">7.46x10<sup>-07</sup></a> | <a href="#">6.64x10<sup>-06</sup></a> |
| <a href="#">918</a> | <a href="#">AL139393.1</a> | <a href="#">3.851979989</a>  | <a href="#">7.53x10<sup>-07</sup></a> | <a href="#">6.67x10<sup>-06</sup></a> |
| <a href="#">919</a> | <a href="#">AC087392.2</a> | <a href="#">-2.019814213</a> | <a href="#">7.50x10<sup>-07</sup></a> | <a href="#">6.67x10<sup>-06</sup></a> |

|                     |                            |                              |                                       |                                       |
|---------------------|----------------------------|------------------------------|---------------------------------------|---------------------------------------|
| <a href="#">920</a> | <a href="#">AC087667.1</a> | <a href="#">3.365516657</a>  | <a href="#">7.58x10<sup>-07</sup></a> | <a href="#">6.71x10<sup>-06</sup></a> |
| <a href="#">921</a> | <a href="#">C10orf126</a>  | <a href="#">3.716047422</a>  | <a href="#">7.60x10<sup>-07</sup></a> | <a href="#">6.72x10<sup>-06</sup></a> |
| <a href="#">922</a> | <a href="#">AC002094.1</a> | <a href="#">3.201242868</a>  | <a href="#">7.61x10<sup>-07</sup></a> | <a href="#">6.73x10<sup>-06</sup></a> |
| <a href="#">923</a> | <a href="#">AC022140.1</a> | <a href="#">2.71946524</a>   | <a href="#">7.61x10<sup>-07</sup></a> | <a href="#">6.73x10<sup>-06</sup></a> |
| <a href="#">924</a> | <a href="#">LINC01449</a>  | <a href="#">3.318907932</a>  | <a href="#">7.65x10<sup>-07</sup></a> | <a href="#">6.75x10<sup>-06</sup></a> |
| <a href="#">925</a> | <a href="#">AC091179.2</a> | <a href="#">4.954682913</a>  | <a href="#">7.82x10<sup>-07</sup></a> | <a href="#">6.89x10<sup>-06</sup></a> |
| <a href="#">926</a> | <a href="#">AL589642.2</a> | <a href="#">2.276170363</a>  | <a href="#">7.85x10<sup>-07</sup></a> | <a href="#">6.91x10<sup>-06</sup></a> |
| <a href="#">927</a> | <a href="#">LINC02170</a>  | <a href="#">2.407364454</a>  | <a href="#">7.93x10<sup>-07</sup></a> | <a href="#">6.96x10<sup>-06</sup></a> |
| <a href="#">928</a> | <a href="#">AC078778.1</a> | <a href="#">2.183374655</a>  | <a href="#">7.95x10<sup>-07</sup></a> | <a href="#">6.98x10<sup>-06</sup></a> |
| <a href="#">929</a> | <a href="#">AC123905.1</a> | <a href="#">3.069180259</a>  | <a href="#">8.10x10<sup>-07</sup></a> | <a href="#">7.09x10<sup>-06</sup></a> |
| <a href="#">930</a> | <a href="#">AC106771.1</a> | <a href="#">5.58436671</a>   | <a href="#">8.41x10<sup>-07</sup></a> | <a href="#">7.34x10<sup>-06</sup></a> |
| <a href="#">931</a> | <a href="#">LINC01036</a>  | <a href="#">2.807828136</a>  | <a href="#">8.44x10<sup>-07</sup></a> | <a href="#">7.36x10<sup>-06</sup></a> |
| <a href="#">932</a> | <a href="#">AC091151.1</a> | <a href="#">4.875604878</a>  | <a href="#">8.47x10<sup>-07</sup></a> | <a href="#">7.38x10<sup>-06</sup></a> |
| <a href="#">933</a> | <a href="#">LINC02327</a>  | <a href="#">3.933094246</a>  | <a href="#">8.56x10<sup>-07</sup></a> | <a href="#">7.44x10<sup>-06</sup></a> |
| <a href="#">934</a> | <a href="#">AL161645.1</a> | <a href="#">2.321797201</a>  | <a href="#">8.58x10<sup>-07</sup></a> | <a href="#">7.45x10<sup>-06</sup></a> |
| <a href="#">935</a> | <a href="#">FGF12-AS3</a>  | <a href="#">3.270630042</a>  | <a href="#">8.79x10<sup>-07</sup></a> | <a href="#">7.61x10<sup>-06</sup></a> |
| <a href="#">936</a> | <a href="#">LINC01040</a>  | <a href="#">2.98673358</a>   | <a href="#">8.79x10<sup>-07</sup></a> | <a href="#">7.61x10<sup>-06</sup></a> |
| <a href="#">937</a> | <a href="#">AC005858.1</a> | <a href="#">4.990304953</a>  | <a href="#">9.08x10<sup>-07</sup></a> | <a href="#">7.83x10<sup>-06</sup></a> |
| <a href="#">938</a> | <a href="#">AC004801.5</a> | <a href="#">3.202211161</a>  | <a href="#">9.12x10<sup>-07</sup></a> | <a href="#">7.86x10<sup>-06</sup></a> |
| <a href="#">939</a> | <a href="#">AC109492.1</a> | <a href="#">2.464101423</a>  | <a href="#">9.12x10<sup>-07</sup></a> | <a href="#">7.86x10<sup>-06</sup></a> |
| <a href="#">940</a> | <a href="#">LINC00567</a>  | <a href="#">2.031817751</a>  | <a href="#">9.14x10<sup>-07</sup></a> | <a href="#">7.87x10<sup>-06</sup></a> |
| <a href="#">941</a> | <a href="#">AC002066.1</a> | <a href="#">-2.088486214</a> | <a href="#">9.43x10<sup>-07</sup></a> | <a href="#">8.09x10<sup>-06</sup></a> |
| <a href="#">942</a> | <a href="#">LINC01979</a>  | <a href="#">2.537187897</a>  | <a href="#">9.53x10<sup>-07</sup></a> | <a href="#">8.17x10<sup>-06</sup></a> |
| <a href="#">943</a> | <a href="#">AC073311.1</a> | <a href="#">3.69173637</a>   | <a href="#">9.65x10<sup>-07</sup></a> | <a href="#">8.26x10<sup>-06</sup></a> |
| <a href="#">944</a> | <a href="#">AC148477.2</a> | <a href="#">3.98646837</a>   | <a href="#">9.75x10<sup>-07</sup></a> | <a href="#">8.34x10<sup>-06</sup></a> |
| <a href="#">945</a> | <a href="#">AC022148.1</a> | <a href="#">2.481608354</a>  | <a href="#">9.87x10<sup>-07</sup></a> | <a href="#">8.43x10<sup>-06</sup></a> |
| <a href="#">946</a> | <a href="#">AC016723.1</a> | <a href="#">4.319201421</a>  | <a href="#">9.94x10<sup>-07</sup></a> | <a href="#">8.46x10<sup>-06</sup></a> |
| <a href="#">947</a> | <a href="#">AL391704.3</a> | <a href="#">3.160877552</a>  | <a href="#">9.95x10<sup>-07</sup></a> | <a href="#">8.47x10<sup>-06</sup></a> |

|                     |                            |                              |                                       |                                       |
|---------------------|----------------------------|------------------------------|---------------------------------------|---------------------------------------|
| <a href="#">948</a> | <a href="#">LINC01299</a>  | <a href="#">4.163118526</a>  | <a href="#">1.00x10<sup>-06</sup></a> | <a href="#">8.51x10<sup>-06</sup></a> |
| <a href="#">949</a> | <a href="#">AC111149.2</a> | <a href="#">4.136225871</a>  | <a href="#">1.01x10<sup>-06</sup></a> | <a href="#">8.60x10<sup>-06</sup></a> |
| <a href="#">950</a> | <a href="#">AC245056.1</a> | <a href="#">3.605309242</a>  | <a href="#">1.01x10<sup>-06</sup></a> | <a href="#">8.60x10<sup>-06</sup></a> |
| <a href="#">951</a> | <a href="#">AC099552.3</a> | <a href="#">2.213073731</a>  | <a href="#">1.02x10<sup>-06</sup></a> | <a href="#">8.63x10<sup>-06</sup></a> |
| <a href="#">952</a> | <a href="#">AP001547.1</a> | <a href="#">2.140558626</a>  | <a href="#">1.02x10<sup>-06</sup></a> | <a href="#">8.63x10<sup>-06</sup></a> |
| <a href="#">953</a> | <a href="#">AC007785.1</a> | <a href="#">2.579790162</a>  | <a href="#">1.03x10<sup>-06</sup></a> | <a href="#">8.69x10<sup>-06</sup></a> |
| <a href="#">954</a> | <a href="#">AC079414.1</a> | <a href="#">2.34905485</a>   | <a href="#">1.04x10<sup>-06</sup></a> | <a href="#">8.77x10<sup>-06</sup></a> |
| <a href="#">955</a> | <a href="#">AC011603.1</a> | <a href="#">3.194787109</a>  | <a href="#">1.05x10<sup>-06</sup></a> | <a href="#">8.85x10<sup>-06</sup></a> |
| <a href="#">956</a> | <a href="#">AL121832.3</a> | <a href="#">2.418551222</a>  | <a href="#">1.07x10<sup>-06</sup></a> | <a href="#">8.97x10<sup>-06</sup></a> |
| <a href="#">957</a> | <a href="#">AL355512.1</a> | <a href="#">2.766760302</a>  | <a href="#">1.08x10<sup>-06</sup></a> | <a href="#">9.08x10<sup>-06</sup></a> |
| <a href="#">958</a> | <a href="#">AC017083.2</a> | <a href="#">2.386285213</a>  | <a href="#">1.09x10<sup>-06</sup></a> | <a href="#">9.14x10<sup>-06</sup></a> |
| <a href="#">959</a> | <a href="#">AC009075.1</a> | <a href="#">2.646034727</a>  | <a href="#">1.10x10<sup>-06</sup></a> | <a href="#">9.25x10<sup>-06</sup></a> |
| <a href="#">960</a> | <a href="#">AL354861.3</a> | <a href="#">-2.017978436</a> | <a href="#">1.17x10<sup>-06</sup></a> | <a href="#">9.82x10<sup>-06</sup></a> |
| <a href="#">961</a> | <a href="#">AC107393.2</a> | <a href="#">2.528385168</a>  | <a href="#">1.18x10<sup>-06</sup></a> | <a href="#">9.85x10<sup>-06</sup></a> |
| <a href="#">962</a> | <a href="#">AL354861.2</a> | <a href="#">3.220364427</a>  | <a href="#">1.19x10<sup>-06</sup></a> | <a href="#">9.93x10<sup>-06</sup></a> |
| <a href="#">963</a> | <a href="#">AL162718.1</a> | <a href="#">3.706824169</a>  | <a href="#">1.21x10<sup>-06</sup></a> | <a href="#">1.01x10<sup>-05</sup></a> |
| <a href="#">964</a> | <a href="#">LINC00868</a>  | <a href="#">2.174664745</a>  | <a href="#">1.20x10<sup>-06</sup></a> | <a href="#">1.01x10<sup>-05</sup></a> |
| <a href="#">965</a> | <a href="#">AC132217.1</a> | <a href="#">2.295584487</a>  | <a href="#">1.25x10<sup>-06</sup></a> | <a href="#">1.04x10<sup>-05</sup></a> |
| <a href="#">966</a> | <a href="#">AC084816.1</a> | <a href="#">4.327641127</a>  | <a href="#">1.29x10<sup>-06</sup></a> | <a href="#">1.07x10<sup>-05</sup></a> |
| <a href="#">967</a> | <a href="#">LHFPL3-AS2</a> | <a href="#">-2.026399368</a> | <a href="#">1.29x10<sup>-06</sup></a> | <a href="#">1.07x10<sup>-05</sup></a> |
| <a href="#">968</a> | <a href="#">AC008109.1</a> | <a href="#">4.119930681</a>  | <a href="#">1.36x10<sup>-06</sup></a> | <a href="#">1.12x10<sup>-05</sup></a> |
| <a href="#">969</a> | <a href="#">AC131011.1</a> | <a href="#">2.248986142</a>  | <a href="#">1.36x10<sup>-06</sup></a> | <a href="#">1.12x10<sup>-05</sup></a> |
| <a href="#">970</a> | <a href="#">FOXC2-AS1</a>  | <a href="#">4.130754417</a>  | <a href="#">1.41x10<sup>-06</sup></a> | <a href="#">1.16x10<sup>-05</sup></a> |
| <a href="#">971</a> | <a href="#">AC007848.2</a> | <a href="#">2.374858213</a>  | <a href="#">1.41x10<sup>-06</sup></a> | <a href="#">1.17x10<sup>-05</sup></a> |
| <a href="#">972</a> | <a href="#">AC009743.1</a> | <a href="#">2.086621068</a>  | <a href="#">1.43x10<sup>-06</sup></a> | <a href="#">1.18x10<sup>-05</sup></a> |
| <a href="#">973</a> | <a href="#">LINC02187</a>  | <a href="#">4.854603583</a>  | <a href="#">1.45x10<sup>-06</sup></a> | <a href="#">1.19x10<sup>-05</sup></a> |
| <a href="#">974</a> | <a href="#">LINC01609</a>  | <a href="#">2.983201533</a>  | <a href="#">1.44x10<sup>-06</sup></a> | <a href="#">1.19x10<sup>-05</sup></a> |
| <a href="#">975</a> | <a href="#">AL590867.1</a> | <a href="#">2.374628682</a>  | <a href="#">1.48x10<sup>-06</sup></a> | <a href="#">1.22x10<sup>-05</sup></a> |

|                      |                            |                             |                                       |                                       |
|----------------------|----------------------------|-----------------------------|---------------------------------------|---------------------------------------|
| <a href="#">976</a>  | <a href="#">GPR1-AS</a>    | <a href="#">5.861529471</a> | <a href="#">1.54x10<sup>-06</sup></a> | <a href="#">1.26x10<sup>-05</sup></a> |
| <a href="#">977</a>  | <a href="#">AC116025.2</a> | <a href="#">3.272895117</a> | <a href="#">1.53x10<sup>-06</sup></a> | <a href="#">1.26x10<sup>-05</sup></a> |
| <a href="#">978</a>  | <a href="#">AL031584.2</a> | <a href="#">3.030929632</a> | <a href="#">1.54x10<sup>-06</sup></a> | <a href="#">1.26x10<sup>-05</sup></a> |
| <a href="#">979</a>  | <a href="#">AC005090.1</a> | <a href="#">5.231257462</a> | <a href="#">1.56x10<sup>-06</sup></a> | <a href="#">1.28x10<sup>-05</sup></a> |
| <a href="#">980</a>  | <a href="#">AC025524.2</a> | <a href="#">3.732070236</a> | <a href="#">1.57x10<sup>-06</sup></a> | <a href="#">1.28x10<sup>-05</sup></a> |
| <a href="#">981</a>  | <a href="#">LINC01411</a>  | <a href="#">3.474761141</a> | <a href="#">1.56x10<sup>-06</sup></a> | <a href="#">1.28x10<sup>-05</sup></a> |
| <a href="#">982</a>  | <a href="#">AC006065.4</a> | <a href="#">3.684107297</a> | <a href="#">1.58x10<sup>-06</sup></a> | <a href="#">1.29x10<sup>-05</sup></a> |
| <a href="#">983</a>  | <a href="#">AC109830.1</a> | <a href="#">4.59818153</a>  | <a href="#">1.59x10<sup>-06</sup></a> | <a href="#">1.30x10<sup>-05</sup></a> |
| <a href="#">984</a>  | <a href="#">AC004221.1</a> | <a href="#">3.269429753</a> | <a href="#">1.61x10<sup>-06</sup></a> | <a href="#">1.31x10<sup>-05</sup></a> |
| <a href="#">985</a>  | <a href="#">AC093001.1</a> | <a href="#">2.591266362</a> | <a href="#">1.63x10<sup>-06</sup></a> | <a href="#">1.33x10<sup>-05</sup></a> |
| <a href="#">986</a>  | <a href="#">AC145343.1</a> | <a href="#">3.271410028</a> | <a href="#">1.65x10<sup>-06</sup></a> | <a href="#">1.34x10<sup>-05</sup></a> |
| <a href="#">987</a>  | <a href="#">AC097375.1</a> | <a href="#">2.057843801</a> | <a href="#">1.65x10<sup>-06</sup></a> | <a href="#">1.34x10<sup>-05</sup></a> |
| <a href="#">988</a>  | <a href="#">AC116424.1</a> | <a href="#">2.143810867</a> | <a href="#">1.67x10<sup>-06</sup></a> | <a href="#">1.36x10<sup>-05</sup></a> |
| <a href="#">989</a>  | <a href="#">AC013799.1</a> | <a href="#">4.217128628</a> | <a href="#">1.69x10<sup>-06</sup></a> | <a href="#">1.37x10<sup>-05</sup></a> |
| <a href="#">990</a>  | <a href="#">AC104024.2</a> | <a href="#">3.685599152</a> | <a href="#">1.72x10<sup>-06</sup></a> | <a href="#">1.39x10<sup>-05</sup></a> |
| <a href="#">991</a>  | <a href="#">AC138304.1</a> | <a href="#">3.065589356</a> | <a href="#">1.76x10<sup>-06</sup></a> | <a href="#">1.42x10<sup>-05</sup></a> |
| <a href="#">992</a>  | <a href="#">LINC01511</a>  | <a href="#">2.28563895</a>  | <a href="#">1.75x10<sup>-06</sup></a> | <a href="#">1.42x10<sup>-05</sup></a> |
| <a href="#">993</a>  | <a href="#">AL049775.2</a> | <a href="#">4.75691652</a>  | <a href="#">1.81x10<sup>-06</sup></a> | <a href="#">1.45x10<sup>-05</sup></a> |
| <a href="#">994</a>  | <a href="#">AC020928.1</a> | <a href="#">2.689335271</a> | <a href="#">1.80x10<sup>-06</sup></a> | <a href="#">1.45x10<sup>-05</sup></a> |
| <a href="#">995</a>  | <a href="#">GDNF-AS1</a>   | <a href="#">2.149565548</a> | <a href="#">1.80x10<sup>-06</sup></a> | <a href="#">1.45x10<sup>-05</sup></a> |
| <a href="#">996</a>  | <a href="#">TTY3B</a>      | <a href="#">2.046858597</a> | <a href="#">1.79x10<sup>-06</sup></a> | <a href="#">1.45x10<sup>-05</sup></a> |
| <a href="#">997</a>  | <a href="#">AL160408.1</a> | <a href="#">3.475940611</a> | <a href="#">1.83x10<sup>-06</sup></a> | <a href="#">1.47x10<sup>-05</sup></a> |
| <a href="#">998</a>  | <a href="#">LINC02041</a>  | <a href="#">2.464006406</a> | <a href="#">1.86x10<sup>-06</sup></a> | <a href="#">1.49x10<sup>-05</sup></a> |
| <a href="#">999</a>  | <a href="#">LINC02086</a>  | <a href="#">3.97330983</a>  | <a href="#">1.88x10<sup>-06</sup></a> | <a href="#">1.50x10<sup>-05</sup></a> |
| <a href="#">1000</a> | <a href="#">AC012174.1</a> | <a href="#">3.410821343</a> | <a href="#">1.88x10<sup>-06</sup></a> | <a href="#">1.51x10<sup>-05</sup></a> |
| <a href="#">1001</a> | <a href="#">MEG8</a>       | <a href="#">2.434525293</a> | <a href="#">1.91x10<sup>-06</sup></a> | <a href="#">1.53x10<sup>-05</sup></a> |
| <a href="#">1002</a> | <a href="#">AP003119.3</a> | <a href="#">2.179606104</a> | <a href="#">1.92x10<sup>-06</sup></a> | <a href="#">1.54x10<sup>-05</sup></a> |
| <a href="#">1003</a> | <a href="#">AC128689.1</a> | <a href="#">4.133761383</a> | <a href="#">1.98x10<sup>-06</sup></a> | <a href="#">1.58x10<sup>-05</sup></a> |

|                      |                                 |                              |                                       |                                       |
|----------------------|---------------------------------|------------------------------|---------------------------------------|---------------------------------------|
| <a href="#">1004</a> | <a href="#">AL136537.2</a>      | <a href="#">2.47828927</a>   | <a href="#">1.99x10<sup>-06</sup></a> | <a href="#">1.58x10<sup>-05</sup></a> |
| <a href="#">1005</a> | <a href="#">AC073525.1</a>      | <a href="#">3.408287532</a>  | <a href="#">2.00x10<sup>-06</sup></a> | <a href="#">1.59x10<sup>-05</sup></a> |
| <a href="#">1006</a> | <a href="#">FARSA-AS1</a>       | <a href="#">2.214133576</a>  | <a href="#">2.00x10<sup>-06</sup></a> | <a href="#">1.59x10<sup>-05</sup></a> |
| <a href="#">1007</a> | <a href="#">UBE2E2-AS1</a>      | <a href="#">2.350673425</a>  | <a href="#">2.02x10<sup>-06</sup></a> | <a href="#">1.60x10<sup>-05</sup></a> |
| <a href="#">1008</a> | <a href="#">AC091153.2</a>      | <a href="#">2.339706639</a>  | <a href="#">2.02x10<sup>-06</sup></a> | <a href="#">1.60x10<sup>-05</sup></a> |
| <a href="#">1009</a> | <a href="#">LINC02208</a>       | <a href="#">2.886283682</a>  | <a href="#">2.10x10<sup>-06</sup></a> | <a href="#">1.65x10<sup>-05</sup></a> |
| <a href="#">1010</a> | <a href="#">AF038458.3</a>      | <a href="#">2.26566983</a>   | <a href="#">2.08x10<sup>-06</sup></a> | <a href="#">1.65x10<sup>-05</sup></a> |
| <a href="#">1011</a> | <a href="#">AC108451.2</a>      | <a href="#">4.255466668</a>  | <a href="#">2.13x10<sup>-06</sup></a> | <a href="#">1.68x10<sup>-05</sup></a> |
| <a href="#">1012</a> | <a href="#">AC022126.1</a>      | <a href="#">2.026581458</a>  | <a href="#">2.14x10<sup>-06</sup></a> | <a href="#">1.68x10<sup>-05</sup></a> |
| <a href="#">1013</a> | <a href="#">LINC00456</a>       | <a href="#">2.282628814</a>  | <a href="#">2.17x10<sup>-06</sup></a> | <a href="#">1.71x10<sup>-05</sup></a> |
| <a href="#">1014</a> | <a href="#">AC078842.2</a>      | <a href="#">2.167639907</a>  | <a href="#">2.17x10<sup>-06</sup></a> | <a href="#">1.71x10<sup>-05</sup></a> |
| <a href="#">1015</a> | <a href="#">LINC01682</a>       | <a href="#">3.185298573</a>  | <a href="#">2.19x10<sup>-06</sup></a> | <a href="#">1.72x10<sup>-05</sup></a> |
| <a href="#">1016</a> | <a href="#">AC024937.3</a>      | <a href="#">2.048944577</a>  | <a href="#">2.18x10<sup>-06</sup></a> | <a href="#">1.72x10<sup>-05</sup></a> |
| <a href="#">1017</a> | <a href="#">SAMSN1-AS1</a>      | <a href="#">4.193866578</a>  | <a href="#">2.20x10<sup>-06</sup></a> | <a href="#">1.73x10<sup>-05</sup></a> |
| <a href="#">1018</a> | <a href="#">MYO16-AS1</a>       | <a href="#">-2.321066425</a> | <a href="#">2.20x10<sup>-06</sup></a> | <a href="#">1.73x10<sup>-05</sup></a> |
| <a href="#">1019</a> | <a href="#">AC126696.3</a>      | <a href="#">3.347463963</a>  | <a href="#">2.22x10<sup>-06</sup></a> | <a href="#">1.74x10<sup>-05</sup></a> |
| <a href="#">1020</a> | <a href="#">AP001619.2</a>      | <a href="#">3.067087418</a>  | <a href="#">2.23x10<sup>-06</sup></a> | <a href="#">1.75x10<sup>-05</sup></a> |
| <a href="#">1021</a> | <a href="#">LINC01924</a>       | <a href="#">2.558258933</a>  | <a href="#">2.24x10<sup>-06</sup></a> | <a href="#">1.75x10<sup>-05</sup></a> |
| <a href="#">1022</a> | <a href="#">AC022733.2</a>      | <a href="#">2.040390474</a>  | <a href="#">2.25x10<sup>-06</sup></a> | <a href="#">1.76x10<sup>-05</sup></a> |
| <a href="#">1023</a> | <a href="#">AC016716.2</a>      | <a href="#">4.620367327</a>  | <a href="#">2.27x10<sup>-06</sup></a> | <a href="#">1.78x10<sup>-05</sup></a> |
| <a href="#">1024</a> | <a href="#">AL033504.1</a>      | <a href="#">2.970066869</a>  | <a href="#">2.29x10<sup>-06</sup></a> | <a href="#">1.79x10<sup>-05</sup></a> |
| <a href="#">1025</a> | <a href="#">AC068643.2</a>      | <a href="#">2.519753556</a>  | <a href="#">2.29x10<sup>-06</sup></a> | <a href="#">1.79x10<sup>-05</sup></a> |
| <a href="#">1026</a> | <a href="#">LL22NC03-63E9.3</a> | <a href="#">3.384839567</a>  | <a href="#">2.36x10<sup>-06</sup></a> | <a href="#">1.84x10<sup>-05</sup></a> |
| <a href="#">1027</a> | <a href="#">AC087463.4</a>      | <a href="#">2.567667382</a>  | <a href="#">2.38x10<sup>-06</sup></a> | <a href="#">1.85x10<sup>-05</sup></a> |
| <a href="#">1028</a> | <a href="#">AL391427.1</a>      | <a href="#">4.312868391</a>  | <a href="#">2.40x10<sup>-06</sup></a> | <a href="#">1.86x10<sup>-05</sup></a> |
| <a href="#">1029</a> | <a href="#">AC239803.4</a>      | <a href="#">2.847145362</a>  | <a href="#">2.42x10<sup>-06</sup></a> | <a href="#">1.88x10<sup>-05</sup></a> |
| <a href="#">1030</a> | <a href="#">AL391097.2</a>      | <a href="#">2.834639687</a>  | <a href="#">2.49x10<sup>-06</sup></a> | <a href="#">1.93x10<sup>-05</sup></a> |
| <a href="#">1031</a> | <a href="#">MIR31HG</a>         | <a href="#">3.935243361</a>  | <a href="#">2.68x10<sup>-06</sup></a> | <a href="#">2.06x10<sup>-05</sup></a> |

|                      |                             |                             |                                       |                                       |
|----------------------|-----------------------------|-----------------------------|---------------------------------------|---------------------------------------|
| <a href="#">1032</a> | <a href="#">AC133539.1</a>  | <a href="#">3.0423167</a>   | <a href="#">2.70x10<sup>-06</sup></a> | <a href="#">2.07x10<sup>-05</sup></a> |
| <a href="#">1033</a> | <a href="#">AC021594.1</a>  | <a href="#">3.471219823</a> | <a href="#">2.73x10<sup>-06</sup></a> | <a href="#">2.10x10<sup>-05</sup></a> |
| <a href="#">1034</a> | <a href="#">AL357558.1</a>  | <a href="#">2.611485706</a> | <a href="#">2.78x10<sup>-06</sup></a> | <a href="#">2.14x10<sup>-05</sup></a> |
| <a href="#">1035</a> | <a href="#">LINC00491</a>   | <a href="#">2.64752023</a>  | <a href="#">2.81x10<sup>-06</sup></a> | <a href="#">2.16x10<sup>-05</sup></a> |
| <a href="#">1036</a> | <a href="#">AC007159.1</a>  | <a href="#">5.243404761</a> | <a href="#">2.86x10<sup>-06</sup></a> | <a href="#">2.19x10<sup>-05</sup></a> |
| <a href="#">1037</a> | <a href="#">AC004888.1</a>  | <a href="#">2.655598452</a> | <a href="#">2.88x10<sup>-06</sup></a> | <a href="#">2.20x10<sup>-05</sup></a> |
| <a href="#">1038</a> | <a href="#">AL596218.1</a>  | <a href="#">2.487635372</a> | <a href="#">2.87x10<sup>-06</sup></a> | <a href="#">2.20x10<sup>-05</sup></a> |
| <a href="#">1039</a> | <a href="#">AC083973.1</a>  | <a href="#">3.064697304</a> | <a href="#">2.89x10<sup>-06</sup></a> | <a href="#">2.21x10<sup>-05</sup></a> |
| <a href="#">1040</a> | <a href="#">PTCHD1-AS</a>   | <a href="#">2.33492371</a>  | <a href="#">2.92x10<sup>-06</sup></a> | <a href="#">2.22x10<sup>-05</sup></a> |
| <a href="#">1041</a> | <a href="#">LINC01477</a>   | <a href="#">2.47506013</a>  | <a href="#">2.94x10<sup>-06</sup></a> | <a href="#">2.24x10<sup>-05</sup></a> |
| <a href="#">1042</a> | <a href="#">AC106729.1</a>  | <a href="#">2.360535163</a> | <a href="#">2.97x10<sup>-06</sup></a> | <a href="#">2.26x10<sup>-05</sup></a> |
| <a href="#">1043</a> | <a href="#">AL592528.1</a>  | <a href="#">2.77041707</a>  | <a href="#">3.01x10<sup>-06</sup></a> | <a href="#">2.29x10<sup>-05</sup></a> |
| <a href="#">1044</a> | <a href="#">HOXD-AS2</a>    | <a href="#">3.202719696</a> | <a href="#">3.14x10<sup>-06</sup></a> | <a href="#">2.38x10<sup>-05</sup></a> |
| <a href="#">1045</a> | <a href="#">AL445531.1</a>  | <a href="#">2.760463283</a> | <a href="#">3.26x10<sup>-06</sup></a> | <a href="#">2.47x10<sup>-05</sup></a> |
| <a href="#">1046</a> | <a href="#">LINC01984</a>   | <a href="#">2.749558535</a> | <a href="#">3.27x10<sup>-06</sup></a> | <a href="#">2.47x10<sup>-05</sup></a> |
| <a href="#">1047</a> | <a href="#">AC025810.1</a>  | <a href="#">2.935249974</a> | <a href="#">3.39x10<sup>-06</sup></a> | <a href="#">2.55x10<sup>-05</sup></a> |
| <a href="#">1048</a> | <a href="#">LINC01594</a>   | <a href="#">2.641696369</a> | <a href="#">3.41x10<sup>-06</sup></a> | <a href="#">2.56x10<sup>-05</sup></a> |
| <a href="#">1049</a> | <a href="#">AC009133.4</a>  | <a href="#">2.414697381</a> | <a href="#">3.42x10<sup>-06</sup></a> | <a href="#">2.57x10<sup>-05</sup></a> |
| <a href="#">1050</a> | <a href="#">AC105940.2</a>  | <a href="#">2.906691748</a> | <a href="#">3.47x10<sup>-06</sup></a> | <a href="#">2.61x10<sup>-05</sup></a> |
| <a href="#">1051</a> | <a href="#">LINC01323</a>   | <a href="#">2.303853286</a> | <a href="#">3.47x10<sup>-06</sup></a> | <a href="#">2.61x10<sup>-05</sup></a> |
| <a href="#">1052</a> | <a href="#">AC116666.1</a>  | <a href="#">3.8160563</a>   | <a href="#">3.52x10<sup>-06</sup></a> | <a href="#">2.64x10<sup>-05</sup></a> |
| <a href="#">1053</a> | <a href="#">AC104248.1</a>  | <a href="#">3.205418012</a> | <a href="#">3.53x10<sup>-06</sup></a> | <a href="#">2.65x10<sup>-05</sup></a> |
| <a href="#">1054</a> | <a href="#">AC007876.1</a>  | <a href="#">2.650273271</a> | <a href="#">3.60x10<sup>-06</sup></a> | <a href="#">2.70x10<sup>-05</sup></a> |
| <a href="#">1055</a> | <a href="#">AC245128.1</a>  | <a href="#">4.462372003</a> | <a href="#">3.66x10<sup>-06</sup></a> | <a href="#">2.73x10<sup>-05</sup></a> |
| <a href="#">1056</a> | <a href="#">AC020743.2</a>  | <a href="#">3.124037065</a> | <a href="#">3.71x10<sup>-06</sup></a> | <a href="#">2.77x10<sup>-05</sup></a> |
| <a href="#">1057</a> | <a href="#">CYP4A22-AS1</a> | <a href="#">2.742561268</a> | <a href="#">3.72x10<sup>-06</sup></a> | <a href="#">2.77x10<sup>-05</sup></a> |
| <a href="#">1058</a> | <a href="#">AP005137.2</a>  | <a href="#">3.154111723</a> | <a href="#">3.74x10<sup>-06</sup></a> | <a href="#">2.79x10<sup>-05</sup></a> |
| <a href="#">1059</a> | <a href="#">LINC02409</a>   | <a href="#">2.779499124</a> | <a href="#">3.74x10<sup>-06</sup></a> | <a href="#">2.79x10<sup>-05</sup></a> |

|                      |                             |                             |                                       |                                       |
|----------------------|-----------------------------|-----------------------------|---------------------------------------|---------------------------------------|
| <a href="#">1060</a> | <a href="#">AC023421.1</a>  | <a href="#">5.366167472</a> | <a href="#">3.76x10<sup>-06</sup></a> | <a href="#">2.80x10<sup>-05</sup></a> |
| <a href="#">1061</a> | <a href="#">AC006150.1</a>  | <a href="#">2.946930429</a> | <a href="#">3.76x10<sup>-06</sup></a> | <a href="#">2.80x10<sup>-05</sup></a> |
| <a href="#">1062</a> | <a href="#">AL627443.1</a>  | <a href="#">2.572658536</a> | <a href="#">3.77x10<sup>-06</sup></a> | <a href="#">2.80x10<sup>-05</sup></a> |
| <a href="#">1063</a> | <a href="#">AC011473.3</a>  | <a href="#">2.866086497</a> | <a href="#">3.82x10<sup>-06</sup></a> | <a href="#">2.83x10<sup>-05</sup></a> |
| <a href="#">1064</a> | <a href="#">AC073283.2</a>  | <a href="#">2.171357676</a> | <a href="#">3.88x10<sup>-06</sup></a> | <a href="#">2.87x10<sup>-05</sup></a> |
| <a href="#">1065</a> | <a href="#">LINC00448</a>   | <a href="#">2.153374328</a> | <a href="#">3.88x10<sup>-06</sup></a> | <a href="#">2.88x10<sup>-05</sup></a> |
| <a href="#">1066</a> | <a href="#">AC027514.1</a>  | <a href="#">2.124245705</a> | <a href="#">3.89x10<sup>-06</sup></a> | <a href="#">2.88x10<sup>-05</sup></a> |
| <a href="#">1067</a> | <a href="#">LINC01446</a>   | <a href="#">4.821159291</a> | <a href="#">3.95x10<sup>-06</sup></a> | <a href="#">2.92x10<sup>-05</sup></a> |
| <a href="#">1068</a> | <a href="#">AP006216.2</a>  | <a href="#">3.298069853</a> | <a href="#">4.00x10<sup>-06</sup></a> | <a href="#">2.95x10<sup>-05</sup></a> |
| <a href="#">1069</a> | <a href="#">LINC00355</a>   | <a href="#">4.850528446</a> | <a href="#">4.03x10<sup>-06</sup></a> | <a href="#">2.97x10<sup>-05</sup></a> |
| <a href="#">1070</a> | <a href="#">AP003119.1</a>  | <a href="#">4.085844909</a> | <a href="#">4.03x10<sup>-06</sup></a> | <a href="#">2.97x10<sup>-05</sup></a> |
| <a href="#">1071</a> | <a href="#">AC233280.1</a>  | <a href="#">2.703904827</a> | <a href="#">4.09x10<sup>-06</sup></a> | <a href="#">3.01x10<sup>-05</sup></a> |
| <a href="#">1072</a> | <a href="#">AL589743.4</a>  | <a href="#">2.208017422</a> | <a href="#">4.11x10<sup>-06</sup></a> | <a href="#">3.03x10<sup>-05</sup></a> |
| <a href="#">1073</a> | <a href="#">LINC02036</a>   | <a href="#">2.162052581</a> | <a href="#">4.14x10<sup>-06</sup></a> | <a href="#">3.05x10<sup>-05</sup></a> |
| <a href="#">1074</a> | <a href="#">MIR194-2HG</a>  | <a href="#">3.04847868</a>  | <a href="#">4.19x10<sup>-06</sup></a> | <a href="#">3.08x10<sup>-05</sup></a> |
| <a href="#">1075</a> | <a href="#">AC110769.1</a>  | <a href="#">2.433481498</a> | <a href="#">4.24x10<sup>-06</sup></a> | <a href="#">3.11x10<sup>-05</sup></a> |
| <a href="#">1076</a> | <a href="#">AL162431.1</a>  | <a href="#">3.210172791</a> | <a href="#">4.30x10<sup>-06</sup></a> | <a href="#">3.15x10<sup>-05</sup></a> |
| <a href="#">1077</a> | <a href="#">CACNA1C-AS4</a> | <a href="#">2.441268762</a> | <a href="#">4.33x10<sup>-06</sup></a> | <a href="#">3.17x10<sup>-05</sup></a> |
| <a href="#">1078</a> | <a href="#">AC131025.2</a>  | <a href="#">2.88950592</a>  | <a href="#">4.39x10<sup>-06</sup></a> | <a href="#">3.21x10<sup>-05</sup></a> |
| <a href="#">1079</a> | <a href="#">AC009133.5</a>  | <a href="#">3.560178014</a> | <a href="#">4.50x10<sup>-06</sup></a> | <a href="#">3.28x10<sup>-05</sup></a> |
| <a href="#">1080</a> | <a href="#">AC092535.1</a>  | <a href="#">2.657308543</a> | <a href="#">4.62x10<sup>-06</sup></a> | <a href="#">3.36x10<sup>-05</sup></a> |
| <a href="#">1081</a> | <a href="#">LINC02411</a>   | <a href="#">2.621939535</a> | <a href="#">4.66x10<sup>-06</sup></a> | <a href="#">3.38x10<sup>-05</sup></a> |
| <a href="#">1082</a> | <a href="#">LINC00160</a>   | <a href="#">3.493236337</a> | <a href="#">4.70x10<sup>-06</sup></a> | <a href="#">3.41x10<sup>-05</sup></a> |
| <a href="#">1083</a> | <a href="#">LINC01672</a>   | <a href="#">2.563556212</a> | <a href="#">4.72x10<sup>-06</sup></a> | <a href="#">3.42x10<sup>-05</sup></a> |
| <a href="#">1084</a> | <a href="#">LINC01098</a>   | <a href="#">2.289861493</a> | <a href="#">4.81x10<sup>-06</sup></a> | <a href="#">3.48x10<sup>-05</sup></a> |
| <a href="#">1085</a> | <a href="#">AC138089.1</a>  | <a href="#">2.532440973</a> | <a href="#">4.87x10<sup>-06</sup></a> | <a href="#">3.52x10<sup>-05</sup></a> |
| <a href="#">1086</a> | <a href="#">LINC01210</a>   | <a href="#">4.679603104</a> | <a href="#">4.90x10<sup>-06</sup></a> | <a href="#">3.53x10<sup>-05</sup></a> |
| <a href="#">1087</a> | <a href="#">AC011338.1</a>  | <a href="#">3.616545741</a> | <a href="#">4.89x10<sup>-06</sup></a> | <a href="#">3.53x10<sup>-05</sup></a> |

|                      |                            |                             |                                       |                                       |
|----------------------|----------------------------|-----------------------------|---------------------------------------|---------------------------------------|
| <a href="#">1088</a> | <a href="#">LINC02362</a>  | <a href="#">2.931655942</a> | <a href="#">4.89x10<sup>-06</sup></a> | <a href="#">3.53x10<sup>-05</sup></a> |
| <a href="#">1089</a> | <a href="#">LINC02261</a>  | <a href="#">2.787693211</a> | <a href="#">5.04x10<sup>-06</sup></a> | <a href="#">3.62x10<sup>-05</sup></a> |
| <a href="#">1090</a> | <a href="#">AC068305.3</a> | <a href="#">3.4354635</a>   | <a href="#">5.06x10<sup>-06</sup></a> | <a href="#">3.64x10<sup>-05</sup></a> |
| <a href="#">1091</a> | <a href="#">AC094105.1</a> | <a href="#">2.774136993</a> | <a href="#">5.07x10<sup>-06</sup></a> | <a href="#">3.64x10<sup>-05</sup></a> |
| <a href="#">1092</a> | <a href="#">AC022960.2</a> | <a href="#">2.081071139</a> | <a href="#">5.10x10<sup>-06</sup></a> | <a href="#">3.66x10<sup>-05</sup></a> |
| <a href="#">1093</a> | <a href="#">AC026368.1</a> | <a href="#">2.761677254</a> | <a href="#">5.19x10<sup>-06</sup></a> | <a href="#">3.72x10<sup>-05</sup></a> |
| <a href="#">1094</a> | <a href="#">AL023803.1</a> | <a href="#">2.143815816</a> | <a href="#">5.28x10<sup>-06</sup></a> | <a href="#">3.77x10<sup>-05</sup></a> |
| <a href="#">1095</a> | <a href="#">AC090531.1</a> | <a href="#">2.190473214</a> | <a href="#">5.30x10<sup>-06</sup></a> | <a href="#">3.78x10<sup>-05</sup></a> |
| <a href="#">1096</a> | <a href="#">LINC00519</a>  | <a href="#">2.989050951</a> | <a href="#">5.34x10<sup>-06</sup></a> | <a href="#">3.81x10<sup>-05</sup></a> |
| <a href="#">1097</a> | <a href="#">LINC01632</a>  | <a href="#">4.063646277</a> | <a href="#">5.43x10<sup>-06</sup></a> | <a href="#">3.86x10<sup>-05</sup></a> |
| <a href="#">1098</a> | <a href="#">LINC01681</a>  | <a href="#">2.151166551</a> | <a href="#">5.46x10<sup>-06</sup></a> | <a href="#">3.88x10<sup>-05</sup></a> |
| <a href="#">1099</a> | <a href="#">AC022118.1</a> | <a href="#">3.235924532</a> | <a href="#">5.50x10<sup>-06</sup></a> | <a href="#">3.91x10<sup>-05</sup></a> |
| <a href="#">1100</a> | <a href="#">AC004264.2</a> | <a href="#">2.418450463</a> | <a href="#">5.53x10<sup>-06</sup></a> | <a href="#">3.92x10<sup>-05</sup></a> |
| <a href="#">1101</a> | <a href="#">AF127577.2</a> | <a href="#">2.408664227</a> | <a href="#">5.54x10<sup>-06</sup></a> | <a href="#">3.93x10<sup>-05</sup></a> |
| <a href="#">1102</a> | <a href="#">GACAT3</a>     | <a href="#">4.865873947</a> | <a href="#">5.64x10<sup>-06</sup></a> | <a href="#">3.99x10<sup>-05</sup></a> |
| <a href="#">1103</a> | <a href="#">AC079742.1</a> | <a href="#">2.058763945</a> | <a href="#">5.72x10<sup>-06</sup></a> | <a href="#">4.04x10<sup>-05</sup></a> |
| <a href="#">1104</a> | <a href="#">AC011491.2</a> | <a href="#">2.413798517</a> | <a href="#">5.75x10<sup>-06</sup></a> | <a href="#">4.06x10<sup>-05</sup></a> |
| <a href="#">1105</a> | <a href="#">AC110921.1</a> | <a href="#">3.502283849</a> | <a href="#">5.76x10<sup>-06</sup></a> | <a href="#">4.07x10<sup>-05</sup></a> |
| <a href="#">1106</a> | <a href="#">AL035458.2</a> | <a href="#">2.099810265</a> | <a href="#">5.78x10<sup>-06</sup></a> | <a href="#">4.07x10<sup>-05</sup></a> |
| <a href="#">1107</a> | <a href="#">TDRG1</a>      | <a href="#">3.854134807</a> | <a href="#">5.98x10<sup>-06</sup></a> | <a href="#">4.20x10<sup>-05</sup></a> |
| <a href="#">1108</a> | <a href="#">AL589678.1</a> | <a href="#">3.425831183</a> | <a href="#">6.01x10<sup>-06</sup></a> | <a href="#">4.22x10<sup>-05</sup></a> |
| <a href="#">1109</a> | <a href="#">LINC00337</a>  | <a href="#">2.973324342</a> | <a href="#">6.01x10<sup>-06</sup></a> | <a href="#">4.22x10<sup>-05</sup></a> |
| <a href="#">1110</a> | <a href="#">LINC01079</a>  | <a href="#">4.395646924</a> | <a href="#">6.07x10<sup>-06</sup></a> | <a href="#">4.25x10<sup>-05</sup></a> |
| <a href="#">1111</a> | <a href="#">AC004920.1</a> | <a href="#">2.321886246</a> | <a href="#">6.13x10<sup>-06</sup></a> | <a href="#">4.30x10<sup>-05</sup></a> |
| <a href="#">1112</a> | <a href="#">LINC00704</a>  | <a href="#">3.698383013</a> | <a href="#">6.27x10<sup>-06</sup></a> | <a href="#">4.38x10<sup>-05</sup></a> |
| <a href="#">1113</a> | <a href="#">LINC00582</a>  | <a href="#">2.42731336</a>  | <a href="#">6.33x10<sup>-06</sup></a> | <a href="#">4.42x10<sup>-05</sup></a> |
| <a href="#">1114</a> | <a href="#">AC073257.1</a> | <a href="#">3.054021034</a> | <a href="#">6.38x10<sup>-06</sup></a> | <a href="#">4.46x10<sup>-05</sup></a> |
| <a href="#">1115</a> | <a href="#">AP000253.1</a> | <a href="#">2.577080368</a> | <a href="#">6.42x10<sup>-06</sup></a> | <a href="#">4.48x10<sup>-05</sup></a> |



|                      |                              |                              |                                       |                                       |
|----------------------|------------------------------|------------------------------|---------------------------------------|---------------------------------------|
| <a href="#">1116</a> | <a href="#">AC104137.1</a>   | <a href="#">3.41813154</a>   | <a href="#">6.46x10<sup>-06</sup></a> | <a href="#">4.50x10<sup>-05</sup></a> |
| <a href="#">1117</a> | <a href="#">AC022535.1</a>   | <a href="#">2.05895458</a>   | <a href="#">6.50x10<sup>-06</sup></a> | <a href="#">4.52x10<sup>-05</sup></a> |
| <a href="#">1118</a> | <a href="#">LINC01391</a>    | <a href="#">4.577908296</a>  | <a href="#">6.51x10<sup>-06</sup></a> | <a href="#">4.53x10<sup>-05</sup></a> |
| <a href="#">1119</a> | <a href="#">AL137798.1</a>   | <a href="#">2.203932588</a>  | <a href="#">6.51x10<sup>-06</sup></a> | <a href="#">4.53x10<sup>-05</sup></a> |
| <a href="#">1120</a> | <a href="#">AL359764.1</a>   | <a href="#">3.929777426</a>  | <a href="#">6.68x10<sup>-06</sup></a> | <a href="#">4.64x10<sup>-05</sup></a> |
| <a href="#">1121</a> | <a href="#">LINC02417</a>    | <a href="#">3.927640091</a>  | <a href="#">6.70x10<sup>-06</sup></a> | <a href="#">4.65x10<sup>-05</sup></a> |
| <a href="#">1122</a> | <a href="#">U62317.5</a>     | <a href="#">3.12485352</a>   | <a href="#">6.75x10<sup>-06</sup></a> | <a href="#">4.68x10<sup>-05</sup></a> |
| <a href="#">1123</a> | <a href="#">LINC01169</a>    | <a href="#">-2.004552044</a> | <a href="#">6.82x10<sup>-06</sup></a> | <a href="#">4.73x10<sup>-05</sup></a> |
| <a href="#">1124</a> | <a href="#">AC012317.1</a>   | <a href="#">3.531598596</a>  | <a href="#">6.86x10<sup>-06</sup></a> | <a href="#">4.75x10<sup>-05</sup></a> |
| <a href="#">1125</a> | <a href="#">LINC02216</a>    | <a href="#">2.960788398</a>  | <a href="#">6.94x10<sup>-06</sup></a> | <a href="#">4.80x10<sup>-05</sup></a> |
| <a href="#">1126</a> | <a href="#">AL121904.1</a>   | <a href="#">3.970062187</a>  | <a href="#">6.99x10<sup>-06</sup></a> | <a href="#">4.82x10<sup>-05</sup></a> |
| <a href="#">1127</a> | <a href="#">AC073863.1</a>   | <a href="#">2.195259442</a>  | <a href="#">6.97x10<sup>-06</sup></a> | <a href="#">4.82x10<sup>-05</sup></a> |
| <a href="#">1128</a> | <a href="#">AC100763.1</a>   | <a href="#">3.776562865</a>  | <a href="#">7.07x10<sup>-06</sup></a> | <a href="#">4.87x10<sup>-05</sup></a> |
| <a href="#">1129</a> | <a href="#">AC112493.1</a>   | <a href="#">3.309266324</a>  | <a href="#">7.09x10<sup>-06</sup></a> | <a href="#">4.88x10<sup>-05</sup></a> |
| <a href="#">1130</a> | <a href="#">LINC02347</a>    | <a href="#">2.734656378</a>  | <a href="#">7.14x10<sup>-06</sup></a> | <a href="#">4.91x10<sup>-05</sup></a> |
| <a href="#">1131</a> | <a href="#">AC015771.1</a>   | <a href="#">2.832318677</a>  | <a href="#">7.23x10<sup>-06</sup></a> | <a href="#">4.97x10<sup>-05</sup></a> |
| <a href="#">1132</a> | <a href="#">AC079384.1</a>   | <a href="#">3.981808659</a>  | <a href="#">7.25x10<sup>-06</sup></a> | <a href="#">4.98x10<sup>-05</sup></a> |
| <a href="#">1133</a> | <a href="#">VAC14-AS1</a>    | <a href="#">2.787833308</a>  | <a href="#">7.26x10<sup>-06</sup></a> | <a href="#">4.99x10<sup>-05</sup></a> |
| <a href="#">1134</a> | <a href="#">AC126323.3</a>   | <a href="#">2.157881545</a>  | <a href="#">7.49x10<sup>-06</sup></a> | <a href="#">5.12x10<sup>-05</sup></a> |
| <a href="#">1135</a> | <a href="#">AC090971.5</a>   | <a href="#">2.333858979</a>  | <a href="#">7.65x10<sup>-06</sup></a> | <a href="#">5.23x10<sup>-05</sup></a> |
| <a href="#">1136</a> | <a href="#">AC089999.3</a>   | <a href="#">2.395523228</a>  | <a href="#">7.78x10<sup>-06</sup></a> | <a href="#">5.30x10<sup>-05</sup></a> |
| <a href="#">1137</a> | <a href="#">AF230666.1</a>   | <a href="#">2.046840549</a>  | <a href="#">7.80x10<sup>-06</sup></a> | <a href="#">5.31x10<sup>-05</sup></a> |
| <a href="#">1138</a> | <a href="#">AC100800.1</a>   | <a href="#">3.936968499</a>  | <a href="#">8.04x10<sup>-06</sup></a> | <a href="#">5.46x10<sup>-05</sup></a> |
| <a href="#">1139</a> | <a href="#">LEMD1-AS1</a>    | <a href="#">2.48601629</a>   | <a href="#">8.07x10<sup>-06</sup></a> | <a href="#">5.47x10<sup>-05</sup></a> |
| <a href="#">1140</a> | <a href="#">AC119868.2</a>   | <a href="#">2.138983332</a>  | <a href="#">8.06x10<sup>-06</sup></a> | <a href="#">5.47x10<sup>-05</sup></a> |
| <a href="#">1141</a> | <a href="#">ANKRD34C-AS1</a> | <a href="#">2.351816002</a>  | <a href="#">8.15x10<sup>-06</sup></a> | <a href="#">5.51x10<sup>-05</sup></a> |
| <a href="#">1142</a> | <a href="#">AC096644.1</a>   | <a href="#">3.158051517</a>  | <a href="#">8.21x10<sup>-06</sup></a> | <a href="#">5.55x10<sup>-05</sup></a> |
| <a href="#">1143</a> | <a href="#">AC073174.1</a>   | <a href="#">4.291847415</a>  | <a href="#">8.41x10<sup>-06</sup></a> | <a href="#">5.67x10<sup>-05</sup></a> |

|                      |                            |                              |                                       |                                       |
|----------------------|----------------------------|------------------------------|---------------------------------------|---------------------------------------|
| <a href="#">1144</a> | <a href="#">AC010719.1</a> | <a href="#">3.101245064</a>  | <a href="#">8.54x10<sup>-06</sup></a> | <a href="#">5.75x10<sup>-05</sup></a> |
| <a href="#">1145</a> | <a href="#">AL589947.1</a> | <a href="#">3.662470636</a>  | <a href="#">8.62x10<sup>-06</sup></a> | <a href="#">5.80x10<sup>-05</sup></a> |
| <a href="#">1146</a> | <a href="#">AC025265.1</a> | <a href="#">2.002164522</a>  | <a href="#">8.61x10<sup>-06</sup></a> | <a href="#">5.80x10<sup>-05</sup></a> |
| <a href="#">1147</a> | <a href="#">AC091868.2</a> | <a href="#">2.451009487</a>  | <a href="#">8.78x10<sup>-06</sup></a> | <a href="#">5.89x10<sup>-05</sup></a> |
| <a href="#">1148</a> | <a href="#">AC010969.1</a> | <a href="#">2.146107986</a>  | <a href="#">8.82x10<sup>-06</sup></a> | <a href="#">5.92x10<sup>-05</sup></a> |
| <a href="#">1149</a> | <a href="#">AL138767.1</a> | <a href="#">2.071666816</a>  | <a href="#">8.86x10<sup>-06</sup></a> | <a href="#">5.94x10<sup>-05</sup></a> |
| <a href="#">1150</a> | <a href="#">AL669970.2</a> | <a href="#">2.841726825</a>  | <a href="#">8.99x10<sup>-06</sup></a> | <a href="#">6.02x10<sup>-05</sup></a> |
| <a href="#">1151</a> | <a href="#">AL121652.1</a> | <a href="#">2.115253864</a>  | <a href="#">8.99x10<sup>-06</sup></a> | <a href="#">6.02x10<sup>-05</sup></a> |
| <a href="#">1152</a> | <a href="#">LINC02128</a>  | <a href="#">2.58538809</a>   | <a href="#">9.10x10<sup>-06</sup></a> | <a href="#">6.07x10<sup>-05</sup></a> |
| <a href="#">1153</a> | <a href="#">AC083801.2</a> | <a href="#">3.772511015</a>  | <a href="#">9.19x10<sup>-06</sup></a> | <a href="#">6.13x10<sup>-05</sup></a> |
| <a href="#">1154</a> | <a href="#">LINC02477</a>  | <a href="#">3.4257014</a>    | <a href="#">9.30x10<sup>-06</sup></a> | <a href="#">6.19x10<sup>-05</sup></a> |
| <a href="#">1155</a> | <a href="#">AC034245.1</a> | <a href="#">2.033313562</a>  | <a href="#">9.31x10<sup>-06</sup></a> | <a href="#">6.20x10<sup>-05</sup></a> |
| <a href="#">1156</a> | <a href="#">AC129507.4</a> | <a href="#">3.846628652</a>  | <a href="#">9.37x10<sup>-06</sup></a> | <a href="#">6.23x10<sup>-05</sup></a> |
| <a href="#">1157</a> | <a href="#">AC132807.2</a> | <a href="#">3.471078263</a>  | <a href="#">9.53x10<sup>-06</sup></a> | <a href="#">6.32x10<sup>-05</sup></a> |
| <a href="#">1158</a> | <a href="#">AC063926.1</a> | <a href="#">2.659472477</a>  | <a href="#">9.83x10<sup>-06</sup></a> | <a href="#">6.50x10<sup>-05</sup></a> |
| <a href="#">1159</a> | <a href="#">AC110813.1</a> | <a href="#">2.518176496</a>  | <a href="#">9.88x10<sup>-06</sup></a> | <a href="#">6.52x10<sup>-05</sup></a> |
| <a href="#">1160</a> | <a href="#">LINC00470</a>  | <a href="#">3.182546037</a>  | <a href="#">9.90x10<sup>-06</sup></a> | <a href="#">6.53x10<sup>-05</sup></a> |
| <a href="#">1161</a> | <a href="#">AC125603.4</a> | <a href="#">2.619022855</a>  | <a href="#">9.98x10<sup>-06</sup></a> | <a href="#">6.56x10<sup>-05</sup></a> |
| <a href="#">1162</a> | <a href="#">UMODL1-AS1</a> | <a href="#">-2.037052935</a> | <a href="#">9.97x10<sup>-06</sup></a> | <a href="#">6.56x10<sup>-05</sup></a> |
| <a href="#">1163</a> | <a href="#">AC136475.3</a> | <a href="#">2.541983561</a>  | <a href="#">9.99x10<sup>-06</sup></a> | <a href="#">6.57x10<sup>-05</sup></a> |
| <a href="#">1164</a> | <a href="#">AL589765.6</a> | <a href="#">2.456125716</a>  | <a href="#">1.02x10<sup>-05</sup></a> | <a href="#">6.67x10<sup>-05</sup></a> |
| <a href="#">1165</a> | <a href="#">PSG8-AS1</a>   | <a href="#">2.018413561</a>  | <a href="#">1.02x10<sup>-05</sup></a> | <a href="#">6.71x10<sup>-05</sup></a> |
| <a href="#">1166</a> | <a href="#">AC109462.2</a> | <a href="#">2.571090631</a>  | <a href="#">1.05x10<sup>-05</sup></a> | <a href="#">6.88x10<sup>-05</sup></a> |
| <a href="#">1167</a> | <a href="#">AC022424.1</a> | <a href="#">3.119502868</a>  | <a href="#">1.06x10<sup>-05</sup></a> | <a href="#">6.89x10<sup>-05</sup></a> |
| <a href="#">1168</a> | <a href="#">AC090987.1</a> | <a href="#">3.118567984</a>  | <a href="#">1.05x10<sup>-05</sup></a> | <a href="#">6.89x10<sup>-05</sup></a> |
| <a href="#">1169</a> | <a href="#">LINC01448</a>  | <a href="#">2.385121026</a>  | <a href="#">1.05x10<sup>-05</sup></a> | <a href="#">6.89x10<sup>-05</sup></a> |
| <a href="#">1170</a> | <a href="#">AC145141.1</a> | <a href="#">2.271162468</a>  | <a href="#">1.11x10<sup>-05</sup></a> | <a href="#">7.21x10<sup>-05</sup></a> |
| <a href="#">1171</a> | <a href="#">AC104985.1</a> | <a href="#">2.799276973</a>  | <a href="#">1.11x10<sup>-05</sup></a> | <a href="#">7.23x10<sup>-05</sup></a> |

|                      |                            |                             |                                       |                                       |
|----------------------|----------------------------|-----------------------------|---------------------------------------|---------------------------------------|
| <a href="#">1172</a> | <a href="#">AC135782.1</a> | <a href="#">3.469392489</a> | <a href="#">1.12x10<sup>-05</sup></a> | <a href="#">7.27x10<sup>-05</sup></a> |
| <a href="#">1173</a> | <a href="#">AL513542.1</a> | <a href="#">2.199925185</a> | <a href="#">1.12x10<sup>-05</sup></a> | <a href="#">7.27x10<sup>-05</sup></a> |
| <a href="#">1174</a> | <a href="#">AF131216.3</a> | <a href="#">2.60124921</a>  | <a href="#">1.16x10<sup>-05</sup></a> | <a href="#">7.53x10<sup>-05</sup></a> |
| <a href="#">1175</a> | <a href="#">AC016903.2</a> | <a href="#">2.411807956</a> | <a href="#">1.16x10<sup>-05</sup></a> | <a href="#">7.53x10<sup>-05</sup></a> |
| <a href="#">1176</a> | <a href="#">AL591896.1</a> | <a href="#">2.396272591</a> | <a href="#">1.19x10<sup>-05</sup></a> | <a href="#">7.69x10<sup>-05</sup></a> |
| <a href="#">1177</a> | <a href="#">AL031056.2</a> | <a href="#">2.470089899</a> | <a href="#">1.26x10<sup>-05</sup></a> | <a href="#">8.09x10<sup>-05</sup></a> |
| <a href="#">1178</a> | <a href="#">AC074389.2</a> | <a href="#">4.07199676</a>  | <a href="#">1.27x10<sup>-05</sup></a> | <a href="#">8.18x10<sup>-05</sup></a> |
| <a href="#">1179</a> | <a href="#">AC008083.1</a> | <a href="#">2.882701844</a> | <a href="#">1.28x10<sup>-05</sup></a> | <a href="#">8.24x10<sup>-05</sup></a> |
| <a href="#">1180</a> | <a href="#">AP000424.2</a> | <a href="#">2.724014481</a> | <a href="#">1.30x10<sup>-05</sup></a> | <a href="#">8.36x10<sup>-05</sup></a> |
| <a href="#">1181</a> | <a href="#">LINC01281</a>  | <a href="#">2.401955925</a> | <a href="#">1.32x10<sup>-05</sup></a> | <a href="#">8.45x10<sup>-05</sup></a> |
| <a href="#">1182</a> | <a href="#">AL121772.1</a> | <a href="#">2.005004557</a> | <a href="#">1.33x10<sup>-05</sup></a> | <a href="#">8.51x10<sup>-05</sup></a> |
| <a href="#">1183</a> | <a href="#">AC016737.1</a> | <a href="#">2.149629802</a> | <a href="#">1.39x10<sup>-05</sup></a> | <a href="#">8.85x10<sup>-05</sup></a> |
| <a href="#">1184</a> | <a href="#">LINC00589</a>  | <a href="#">3.0851674</a>   | <a href="#">1.44x10<sup>-05</sup></a> | <a href="#">9.14x10<sup>-05</sup></a> |
| <a href="#">1185</a> | <a href="#">AP003064.1</a> | <a href="#">2.062882373</a> | <a href="#">1.45x10<sup>-05</sup></a> | <a href="#">9.19x10<sup>-05</sup></a> |
| <a href="#">1186</a> | <a href="#">AC104574.2</a> | <a href="#">3.721456772</a> | <a href="#">1.46x10<sup>-05</sup></a> | <a href="#">9.28x10<sup>-05</sup></a> |
| <a href="#">1187</a> | <a href="#">AL035443.1</a> | <a href="#">2.560901914</a> | <a href="#">1.51x10<sup>-05</sup></a> | <a href="#">9.58x10<sup>-05</sup></a> |
| <a href="#">1188</a> | <a href="#">AL928742.1</a> | <a href="#">2.125421427</a> | <a href="#">1.54x10<sup>-05</sup></a> | <a href="#">9.75x10<sup>-05</sup></a> |
| <a href="#">1189</a> | <a href="#">LINC01204</a>  | <a href="#">3.335869816</a> | <a href="#">1.55x10<sup>-05</sup></a> | <a href="#">9.82x10<sup>-05</sup></a> |
| <a href="#">1190</a> | <a href="#">AC090826.2</a> | <a href="#">2.54251616</a>  | <a href="#">1.56x10<sup>-05</sup></a> | <a href="#">9.88x10<sup>-05</sup></a> |
| <a href="#">1191</a> | <a href="#">ASH1L-IT1</a>  | <a href="#">2.37507196</a>  | <a href="#">1.56x10<sup>-05</sup></a> | <a href="#">9.88x10<sup>-05</sup></a> |
| <a href="#">1192</a> | <a href="#">AC008939.1</a> | <a href="#">2.316517524</a> | <a href="#">1.60x10<sup>-05</sup></a> | <a href="#">1.01x10<sup>-04</sup></a> |
| <a href="#">1193</a> | <a href="#">AC106875.1</a> | <a href="#">5.009007777</a> | <a href="#">1.63x10<sup>-05</sup></a> | <a href="#">1.02x10<sup>-04</sup></a> |
| <a href="#">1194</a> | <a href="#">AL355483.3</a> | <a href="#">2.79379078</a>  | <a href="#">1.63x10<sup>-05</sup></a> | <a href="#">1.03x10<sup>-04</sup></a> |
| <a href="#">1195</a> | <a href="#">AC005323.2</a> | <a href="#">2.798981318</a> | <a href="#">1.64x10<sup>-05</sup></a> | <a href="#">1.03x10<sup>-04</sup></a> |
| <a href="#">1196</a> | <a href="#">PRKCA-AS1</a>  | <a href="#">4.000309899</a> | <a href="#">1.65x10<sup>-05</sup></a> | <a href="#">1.03x10<sup>-04</sup></a> |
| <a href="#">1197</a> | <a href="#">AL135787.1</a> | <a href="#">2.868980644</a> | <a href="#">1.66x10<sup>-05</sup></a> | <a href="#">1.04x10<sup>-04</sup></a> |
| <a href="#">1198</a> | <a href="#">LINC00857</a>  | <a href="#">2.533899028</a> | <a href="#">1.69x10<sup>-05</sup></a> | <a href="#">1.06x10<sup>-04</sup></a> |
| <a href="#">1199</a> | <a href="#">AL512310.2</a> | <a href="#">2.0719408</a>   | <a href="#">1.72x10<sup>-05</sup></a> | <a href="#">1.07x10<sup>-04</sup></a> |

|                      |                            |                             |                                       |                                       |
|----------------------|----------------------------|-----------------------------|---------------------------------------|---------------------------------------|
| <a href="#">1200</a> | <a href="#">AC007848.1</a> | <a href="#">3.876003722</a> | <a href="#">1.72x10<sup>-05</sup></a> | <a href="#">1.08x10<sup>-04</sup></a> |
| <a href="#">1201</a> | <a href="#">AL033397.1</a> | <a href="#">5.110328408</a> | <a href="#">1.74x10<sup>-05</sup></a> | <a href="#">1.08x10<sup>-04</sup></a> |
| <a href="#">1202</a> | <a href="#">AC118653.1</a> | <a href="#">2.225166771</a> | <a href="#">1.73x10<sup>-05</sup></a> | <a href="#">1.08x10<sup>-04</sup></a> |
| <a href="#">1203</a> | <a href="#">AC003005.2</a> | <a href="#">2.63212921</a>  | <a href="#">1.74x10<sup>-05</sup></a> | <a href="#">1.08x10<sup>-04</sup></a> |
| <a href="#">1204</a> | <a href="#">AC010478.1</a> | <a href="#">3.055448968</a> | <a href="#">1.76x10<sup>-05</sup></a> | <a href="#">1.09x10<sup>-04</sup></a> |
| <a href="#">1205</a> | <a href="#">AL162411.1</a> | <a href="#">2.351609977</a> | <a href="#">1.76x10<sup>-05</sup></a> | <a href="#">1.09x10<sup>-04</sup></a> |
| <a href="#">1206</a> | <a href="#">AC010997.3</a> | <a href="#">2.507727241</a> | <a href="#">1.80x10<sup>-05</sup></a> | <a href="#">1.11x10<sup>-04</sup></a> |
| <a href="#">1207</a> | <a href="#">AL445471.1</a> | <a href="#">2.708325437</a> | <a href="#">1.80x10<sup>-05</sup></a> | <a href="#">1.12x10<sup>-04</sup></a> |
| <a href="#">1208</a> | <a href="#">AC021127.1</a> | <a href="#">3.328648729</a> | <a href="#">1.81x10<sup>-05</sup></a> | <a href="#">1.12x10<sup>-04</sup></a> |
| <a href="#">1209</a> | <a href="#">LINC02459</a>  | <a href="#">2.553476245</a> | <a href="#">1.83x10<sup>-05</sup></a> | <a href="#">1.13x10<sup>-04</sup></a> |
| <a href="#">1210</a> | <a href="#">AL135838.1</a> | <a href="#">2.675842059</a> | <a href="#">1.86x10<sup>-05</sup></a> | <a href="#">1.15x10<sup>-04</sup></a> |
| <a href="#">1211</a> | <a href="#">AC010894.3</a> | <a href="#">3.248675327</a> | <a href="#">1.87x10<sup>-05</sup></a> | <a href="#">1.15x10<sup>-04</sup></a> |
| <a href="#">1212</a> | <a href="#">AL359792.1</a> | <a href="#">2.337064959</a> | <a href="#">1.89x10<sup>-05</sup></a> | <a href="#">1.16x10<sup>-04</sup></a> |
| <a href="#">1213</a> | <a href="#">AP001372.3</a> | <a href="#">2.59112975</a>  | <a href="#">1.89x10<sup>-05</sup></a> | <a href="#">1.16x10<sup>-04</sup></a> |
| <a href="#">1214</a> | <a href="#">AC117402.1</a> | <a href="#">3.445169056</a> | <a href="#">1.89x10<sup>-05</sup></a> | <a href="#">1.16x10<sup>-04</sup></a> |
| <a href="#">1215</a> | <a href="#">AC015712.6</a> | <a href="#">3.380148512</a> | <a href="#">1.91x10<sup>-05</sup></a> | <a href="#">1.17x10<sup>-04</sup></a> |
| <a href="#">1216</a> | <a href="#">AL133371.1</a> | <a href="#">3.510296232</a> | <a href="#">1.97x10<sup>-05</sup></a> | <a href="#">1.21x10<sup>-04</sup></a> |
| <a href="#">1217</a> | <a href="#">AL591926.2</a> | <a href="#">3.316972684</a> | <a href="#">1.98x10<sup>-05</sup></a> | <a href="#">1.21x10<sup>-04</sup></a> |
| <a href="#">1218</a> | <a href="#">AL133325.2</a> | <a href="#">2.536621425</a> | <a href="#">1.99x10<sup>-05</sup></a> | <a href="#">1.22x10<sup>-04</sup></a> |
| <a href="#">1219</a> | <a href="#">AC107926.1</a> | <a href="#">2.359814517</a> | <a href="#">2.01x10<sup>-05</sup></a> | <a href="#">1.23x10<sup>-04</sup></a> |
| <a href="#">1220</a> | <a href="#">AC009654.1</a> | <a href="#">2.568942035</a> | <a href="#">2.05x10<sup>-05</sup></a> | <a href="#">1.25x10<sup>-04</sup></a> |
| <a href="#">1221</a> | <a href="#">LINC00608</a>  | <a href="#">2.90247356</a>  | <a href="#">2.05x10<sup>-05</sup></a> | <a href="#">1.25x10<sup>-04</sup></a> |
| <a href="#">1222</a> | <a href="#">AL355076.2</a> | <a href="#">2.344456863</a> | <a href="#">2.06x10<sup>-05</sup></a> | <a href="#">1.26x10<sup>-04</sup></a> |
| <a href="#">1223</a> | <a href="#">AC023824.6</a> | <a href="#">2.468877092</a> | <a href="#">2.07x10<sup>-05</sup></a> | <a href="#">1.26x10<sup>-04</sup></a> |
| <a href="#">1224</a> | <a href="#">AC131097.3</a> | <a href="#">3.119427764</a> | <a href="#">2.07x10<sup>-05</sup></a> | <a href="#">1.26x10<sup>-04</sup></a> |
| <a href="#">1225</a> | <a href="#">GPC6-AS1</a>   | <a href="#">2.278627041</a> | <a href="#">2.11x10<sup>-05</sup></a> | <a href="#">1.28x10<sup>-04</sup></a> |
| <a href="#">1226</a> | <a href="#">PCAT6</a>      | <a href="#">2.824165381</a> | <a href="#">2.12x10<sup>-05</sup></a> | <a href="#">1.28x10<sup>-04</sup></a> |
| <a href="#">1227</a> | <a href="#">LINC02437</a>  | <a href="#">2.544932432</a> | <a href="#">2.13x10<sup>-05</sup></a> | <a href="#">1.29x10<sup>-04</sup></a> |

|                      |                            |                             |                                       |                                       |
|----------------------|----------------------------|-----------------------------|---------------------------------------|---------------------------------------|
| <a href="#">1228</a> | <a href="#">AC103718.1</a> | <a href="#">3.027755741</a> | <a href="#">2.16x10<sup>-05</sup></a> | <a href="#">1.30x10<sup>-04</sup></a> |
| <a href="#">1229</a> | <a href="#">LINC01940</a>  | <a href="#">2.384811894</a> | <a href="#">2.16x10<sup>-05</sup></a> | <a href="#">1.31x10<sup>-04</sup></a> |
| <a href="#">1230</a> | <a href="#">AL121829.2</a> | <a href="#">2.358306394</a> | <a href="#">2.17x10<sup>-05</sup></a> | <a href="#">1.31x10<sup>-04</sup></a> |
| <a href="#">1231</a> | <a href="#">AC010745.1</a> | <a href="#">2.457735965</a> | <a href="#">2.18x10<sup>-05</sup></a> | <a href="#">1.31x10<sup>-04</sup></a> |
| <a href="#">1232</a> | <a href="#">AC105760.1</a> | <a href="#">2.685708396</a> | <a href="#">2.21x10<sup>-05</sup></a> | <a href="#">1.33x10<sup>-04</sup></a> |
| <a href="#">1233</a> | <a href="#">AC006372.1</a> | <a href="#">2.826325249</a> | <a href="#">2.23x10<sup>-05</sup></a> | <a href="#">1.34x10<sup>-04</sup></a> |
| <a href="#">1234</a> | <a href="#">AC008738.4</a> | <a href="#">2.650114864</a> | <a href="#">2.23x10<sup>-05</sup></a> | <a href="#">1.34x10<sup>-04</sup></a> |
| <a href="#">1235</a> | <a href="#">AC078850.2</a> | <a href="#">2.981934385</a> | <a href="#">2.27x10<sup>-05</sup></a> | <a href="#">1.36x10<sup>-04</sup></a> |
| <a href="#">1236</a> | <a href="#">AC110285.6</a> | <a href="#">2.7110009</a>   | <a href="#">2.35x10<sup>-05</sup></a> | <a href="#">1.41x10<sup>-04</sup></a> |
| <a href="#">1237</a> | <a href="#">LINC00399</a>  | <a href="#">2.305866272</a> | <a href="#">2.37x10<sup>-05</sup></a> | <a href="#">1.42x10<sup>-04</sup></a> |
| <a href="#">1238</a> | <a href="#">AC002094.2</a> | <a href="#">3.290022261</a> | <a href="#">2.39x10<sup>-05</sup></a> | <a href="#">1.43x10<sup>-04</sup></a> |
| <a href="#">1239</a> | <a href="#">AC009656.1</a> | <a href="#">3.009293075</a> | <a href="#">2.39x10<sup>-05</sup></a> | <a href="#">1.43x10<sup>-04</sup></a> |
| <a href="#">1240</a> | <a href="#">AC004884.2</a> | <a href="#">2.094233742</a> | <a href="#">2.40x10<sup>-05</sup></a> | <a href="#">1.43x10<sup>-04</sup></a> |
| <a href="#">1241</a> | <a href="#">AL031658.2</a> | <a href="#">2.563544231</a> | <a href="#">2.41x10<sup>-05</sup></a> | <a href="#">1.43x10<sup>-04</sup></a> |
| <a href="#">1242</a> | <a href="#">AC027601.3</a> | <a href="#">2.0556909</a>   | <a href="#">2.43x10<sup>-05</sup></a> | <a href="#">1.45x10<sup>-04</sup></a> |
| <a href="#">1243</a> | <a href="#">AL353803.2</a> | <a href="#">2.061834202</a> | <a href="#">2.45x10<sup>-05</sup></a> | <a href="#">1.46x10<sup>-04</sup></a> |
| <a href="#">1244</a> | <a href="#">AC107419.1</a> | <a href="#">3.255692954</a> | <a href="#">2.49x10<sup>-05</sup></a> | <a href="#">1.48x10<sup>-04</sup></a> |
| <a href="#">1245</a> | <a href="#">IFNG-AS1</a>   | <a href="#">2.079911512</a> | <a href="#">2.50x10<sup>-05</sup></a> | <a href="#">1.48x10<sup>-04</sup></a> |
| <a href="#">1246</a> | <a href="#">AL445524.1</a> | <a href="#">3.058285408</a> | <a href="#">2.50x10<sup>-05</sup></a> | <a href="#">1.49x10<sup>-04</sup></a> |
| <a href="#">1247</a> | <a href="#">AP000439.3</a> | <a href="#">2.484104173</a> | <a href="#">2.51x10<sup>-05</sup></a> | <a href="#">1.49x10<sup>-04</sup></a> |
| <a href="#">1248</a> | <a href="#">AL031963.2</a> | <a href="#">2.505421082</a> | <a href="#">2.51x10<sup>-05</sup></a> | <a href="#">1.49x10<sup>-04</sup></a> |
| <a href="#">1249</a> | <a href="#">AC019080.4</a> | <a href="#">2.655701512</a> | <a href="#">2.55x10<sup>-05</sup></a> | <a href="#">1.51x10<sup>-04</sup></a> |
| <a href="#">1250</a> | <a href="#">AL356961.1</a> | <a href="#">2.322318807</a> | <a href="#">2.59x10<sup>-05</sup></a> | <a href="#">1.53x10<sup>-04</sup></a> |
| <a href="#">1251</a> | <a href="#">AL049541.1</a> | <a href="#">3.459739804</a> | <a href="#">2.61x10<sup>-05</sup></a> | <a href="#">1.54x10<sup>-04</sup></a> |
| <a href="#">1252</a> | <a href="#">LINC01615</a>  | <a href="#">2.768483024</a> | <a href="#">2.67x10<sup>-05</sup></a> | <a href="#">1.57x10<sup>-04</sup></a> |
| <a href="#">1253</a> | <a href="#">LINC02303</a>  | <a href="#">4.475725085</a> | <a href="#">2.71x10<sup>-05</sup></a> | <a href="#">1.59x10<sup>-04</sup></a> |
| <a href="#">1254</a> | <a href="#">AC131094.1</a> | <a href="#">2.06146761</a>  | <a href="#">2.72x10<sup>-05</sup></a> | <a href="#">1.60x10<sup>-04</sup></a> |
| <a href="#">1255</a> | <a href="#">FP700125.1</a> | <a href="#">2.730617936</a> | <a href="#">2.76x10<sup>-05</sup></a> | <a href="#">1.61x10<sup>-04</sup></a> |

|                      |                            |                             |                                       |                                       |
|----------------------|----------------------------|-----------------------------|---------------------------------------|---------------------------------------|
| <a href="#">1256</a> | <a href="#">LINC01970</a>  | <a href="#">2.506723311</a> | <a href="#">2.76x10<sup>-05</sup></a> | <a href="#">1.61x10<sup>-04</sup></a> |
| <a href="#">1257</a> | <a href="#">AC011474.2</a> | <a href="#">2.082912397</a> | <a href="#">2.81x10<sup>-05</sup></a> | <a href="#">1.64x10<sup>-04</sup></a> |
| <a href="#">1258</a> | <a href="#">AL031600.2</a> | <a href="#">2.321583549</a> | <a href="#">2.86x10<sup>-05</sup></a> | <a href="#">1.66x10<sup>-04</sup></a> |
| <a href="#">1259</a> | <a href="#">AC007431.1</a> | <a href="#">2.77064003</a>  | <a href="#">2.94x10<sup>-05</sup></a> | <a href="#">1.71x10<sup>-04</sup></a> |
| <a href="#">1260</a> | <a href="#">LINC00349</a>  | <a href="#">3.335962754</a> | <a href="#">2.95x10<sup>-05</sup></a> | <a href="#">1.71x10<sup>-04</sup></a> |
| <a href="#">1261</a> | <a href="#">AC135048.2</a> | <a href="#">2.711280287</a> | <a href="#">2.98x10<sup>-05</sup></a> | <a href="#">1.73x10<sup>-04</sup></a> |
| <a href="#">1262</a> | <a href="#">AC120114.3</a> | <a href="#">2.399849713</a> | <a href="#">3.03x10<sup>-05</sup></a> | <a href="#">1.75x10<sup>-04</sup></a> |
| <a href="#">1263</a> | <a href="#">AC020663.2</a> | <a href="#">2.70362811</a>  | <a href="#">3.09x10<sup>-05</sup></a> | <a href="#">1.78x10<sup>-04</sup></a> |
| <a href="#">1264</a> | <a href="#">AL390729.1</a> | <a href="#">3.073269275</a> | <a href="#">3.12x10<sup>-05</sup></a> | <a href="#">1.79x10<sup>-04</sup></a> |
| <a href="#">1265</a> | <a href="#">AL032819.1</a> | <a href="#">2.311684458</a> | <a href="#">3.20x10<sup>-05</sup></a> | <a href="#">1.84x10<sup>-04</sup></a> |
| <a href="#">1266</a> | <a href="#">Z99943.1</a>   | <a href="#">2.659906246</a> | <a href="#">3.21x10<sup>-05</sup></a> | <a href="#">1.84x10<sup>-04</sup></a> |
| <a href="#">1267</a> | <a href="#">AC006449.3</a> | <a href="#">2.419112936</a> | <a href="#">3.30x10<sup>-05</sup></a> | <a href="#">1.89x10<sup>-04</sup></a> |
| <a href="#">1268</a> | <a href="#">AC244517.8</a> | <a href="#">2.461230175</a> | <a href="#">3.31x10<sup>-05</sup></a> | <a href="#">1.89x10<sup>-04</sup></a> |
| <a href="#">1269</a> | <a href="#">AL357507.1</a> | <a href="#">2.705353867</a> | <a href="#">3.33x10<sup>-05</sup></a> | <a href="#">1.91x10<sup>-04</sup></a> |
| <a href="#">1270</a> | <a href="#">MIR7-3HG</a>   | <a href="#">3.724934015</a> | <a href="#">3.34x10<sup>-05</sup></a> | <a href="#">1.91x10<sup>-04</sup></a> |
| <a href="#">1271</a> | <a href="#">AC044839.4</a> | <a href="#">2.599970331</a> | <a href="#">3.35x10<sup>-05</sup></a> | <a href="#">1.91x10<sup>-04</sup></a> |
| <a href="#">1272</a> | <a href="#">AC115284.1</a> | <a href="#">2.644214224</a> | <a href="#">3.37x10<sup>-05</sup></a> | <a href="#">1.92x10<sup>-04</sup></a> |
| <a href="#">1273</a> | <a href="#">AC012313.4</a> | <a href="#">3.03511192</a>  | <a href="#">3.46x10<sup>-05</sup></a> | <a href="#">1.97x10<sup>-04</sup></a> |
| <a href="#">1274</a> | <a href="#">AC015712.4</a> | <a href="#">2.931779229</a> | <a href="#">3.47x10<sup>-05</sup></a> | <a href="#">1.97x10<sup>-04</sup></a> |
| <a href="#">1275</a> | <a href="#">AL109761.1</a> | <a href="#">2.784326669</a> | <a href="#">3.51x10<sup>-05</sup></a> | <a href="#">1.99x10<sup>-04</sup></a> |
| <a href="#">1276</a> | <a href="#">AC073321.1</a> | <a href="#">2.178056966</a> | <a href="#">3.52x10<sup>-05</sup></a> | <a href="#">2.00x10<sup>-04</sup></a> |
| <a href="#">1277</a> | <a href="#">AC141424.1</a> | <a href="#">2.437609013</a> | <a href="#">3.54x10<sup>-05</sup></a> | <a href="#">2.01x10<sup>-04</sup></a> |
| <a href="#">1278</a> | <a href="#">AP001626.1</a> | <a href="#">2.717806591</a> | <a href="#">3.62x10<sup>-05</sup></a> | <a href="#">2.05x10<sup>-04</sup></a> |
| <a href="#">1279</a> | <a href="#">LINC01727</a>  | <a href="#">2.176786773</a> | <a href="#">3.62x10<sup>-05</sup></a> | <a href="#">2.05x10<sup>-04</sup></a> |
| <a href="#">1280</a> | <a href="#">FRMD6-AS2</a>  | <a href="#">3.718496451</a> | <a href="#">3.64x10<sup>-05</sup></a> | <a href="#">2.06x10<sup>-04</sup></a> |
| <a href="#">1281</a> | <a href="#">AC007386.2</a> | <a href="#">2.787572432</a> | <a href="#">3.64x10<sup>-05</sup></a> | <a href="#">2.06x10<sup>-04</sup></a> |
| <a href="#">1282</a> | <a href="#">LINC01117</a>  | <a href="#">2.344550813</a> | <a href="#">3.69x10<sup>-05</sup></a> | <a href="#">2.08x10<sup>-04</sup></a> |
| <a href="#">1283</a> | <a href="#">AC106882.1</a> | <a href="#">2.766342225</a> | <a href="#">3.70x10<sup>-05</sup></a> | <a href="#">2.09x10<sup>-04</sup></a> |

|                      |                              |                             |                                       |                                       |
|----------------------|------------------------------|-----------------------------|---------------------------------------|---------------------------------------|
| <a href="#">1284</a> | <a href="#">AC010486.3</a>   | <a href="#">2.768136508</a> | <a href="#">3.71x10<sup>-05</sup></a> | <a href="#">2.10x10<sup>-04</sup></a> |
| <a href="#">1285</a> | <a href="#">AC012568.1</a>   | <a href="#">3.410472204</a> | <a href="#">3.78x10<sup>-05</sup></a> | <a href="#">2.13x10<sup>-04</sup></a> |
| <a href="#">1286</a> | <a href="#">AC134312.5</a>   | <a href="#">2.803102342</a> | <a href="#">3.81x10<sup>-05</sup></a> | <a href="#">2.14x10<sup>-04</sup></a> |
| <a href="#">1287</a> | <a href="#">LINC01270</a>    | <a href="#">3.221507299</a> | <a href="#">3.85x10<sup>-05</sup></a> | <a href="#">2.16x10<sup>-04</sup></a> |
| <a href="#">1288</a> | <a href="#">LINC01522</a>    | <a href="#">3.955191169</a> | <a href="#">3.87x10<sup>-05</sup></a> | <a href="#">2.17x10<sup>-04</sup></a> |
| <a href="#">1289</a> | <a href="#">AC023824.5</a>   | <a href="#">3.003769801</a> | <a href="#">3.87x10<sup>-05</sup></a> | <a href="#">2.17x10<sup>-04</sup></a> |
| <a href="#">1290</a> | <a href="#">LINC01361</a>    | <a href="#">2.731547846</a> | <a href="#">3.89x10<sup>-05</sup></a> | <a href="#">2.18x10<sup>-04</sup></a> |
| <a href="#">1291</a> | <a href="#">AC025419.1</a>   | <a href="#">4.030525622</a> | <a href="#">3.93x10<sup>-05</sup></a> | <a href="#">2.20x10<sup>-04</sup></a> |
| <a href="#">1292</a> | <a href="#">AC009139.1</a>   | <a href="#">3.106136435</a> | <a href="#">3.97x10<sup>-05</sup></a> | <a href="#">2.22x10<sup>-04</sup></a> |
| <a href="#">1293</a> | <a href="#">AC126323.6</a>   | <a href="#">2.703350548</a> | <a href="#">4.09x10<sup>-05</sup></a> | <a href="#">2.28x10<sup>-04</sup></a> |
| <a href="#">1294</a> | <a href="#">LINC01493</a>    | <a href="#">2.560606845</a> | <a href="#">4.14x10<sup>-05</sup></a> | <a href="#">2.30x10<sup>-04</sup></a> |
| <a href="#">1295</a> | <a href="#">STARD13-IT1</a>  | <a href="#">2.386154819</a> | <a href="#">4.14x10<sup>-05</sup></a> | <a href="#">2.30x10<sup>-04</sup></a> |
| <a href="#">1296</a> | <a href="#">AC079171.1</a>   | <a href="#">2.329845382</a> | <a href="#">4.18x10<sup>-05</sup></a> | <a href="#">2.32x10<sup>-04</sup></a> |
| <a href="#">1297</a> | <a href="#">AC107892.1</a>   | <a href="#">2.162509201</a> | <a href="#">4.32x10<sup>-05</sup></a> | <a href="#">2.39x10<sup>-04</sup></a> |
| <a href="#">1298</a> | <a href="#">AC009148.1</a>   | <a href="#">2.531117476</a> | <a href="#">4.35x10<sup>-05</sup></a> | <a href="#">2.40x10<sup>-04</sup></a> |
| <a href="#">1299</a> | <a href="#">NAALADL2-AS3</a> | <a href="#">2.65351441</a>  | <a href="#">4.36x10<sup>-05</sup></a> | <a href="#">2.41x10<sup>-04</sup></a> |
| <a href="#">1300</a> | <a href="#">CCDC37-AS1</a>   | <a href="#">2.733155258</a> | <a href="#">4.43x10<sup>-05</sup></a> | <a href="#">2.45x10<sup>-04</sup></a> |
| <a href="#">1301</a> | <a href="#">AC099654.1</a>   | <a href="#">2.3829258</a>   | <a href="#">4.46x10<sup>-05</sup></a> | <a href="#">2.46x10<sup>-04</sup></a> |
| <a href="#">1302</a> | <a href="#">LINC01598</a>    | <a href="#">2.411907571</a> | <a href="#">4.49x10<sup>-05</sup></a> | <a href="#">2.48x10<sup>-04</sup></a> |
| <a href="#">1303</a> | <a href="#">LINC01810</a>    | <a href="#">3.090539872</a> | <a href="#">4.50x10<sup>-05</sup></a> | <a href="#">2.48x10<sup>-04</sup></a> |
| <a href="#">1304</a> | <a href="#">AC009884.1</a>   | <a href="#">3.801836887</a> | <a href="#">4.62x10<sup>-05</sup></a> | <a href="#">2.54x10<sup>-04</sup></a> |
| <a href="#">1305</a> | <a href="#">CASC20</a>       | <a href="#">3.904154103</a> | <a href="#">4.71x10<sup>-05</sup></a> | <a href="#">2.59x10<sup>-04</sup></a> |
| <a href="#">1306</a> | <a href="#">AL139042.1</a>   | <a href="#">2.717771321</a> | <a href="#">4.74x10<sup>-05</sup></a> | <a href="#">2.60x10<sup>-04</sup></a> |
| <a href="#">1307</a> | <a href="#">LINC02323</a>    | <a href="#">2.964947527</a> | <a href="#">4.75x10<sup>-05</sup></a> | <a href="#">2.60x10<sup>-04</sup></a> |
| <a href="#">1308</a> | <a href="#">AL110503.1</a>   | <a href="#">2.434839488</a> | <a href="#">4.80x10<sup>-05</sup></a> | <a href="#">2.63x10<sup>-04</sup></a> |
| <a href="#">1309</a> | <a href="#">AL133480.1</a>   | <a href="#">2.070656624</a> | <a href="#">4.86x10<sup>-05</sup></a> | <a href="#">2.66x10<sup>-04</sup></a> |
| <a href="#">1310</a> | <a href="#">AC083836.1</a>   | <a href="#">2.565363508</a> | <a href="#">4.93x10<sup>-05</sup></a> | <a href="#">2.70x10<sup>-04</sup></a> |
| <a href="#">1311</a> | <a href="#">AC048383.1</a>   | <a href="#">2.71534719</a>  | <a href="#">4.95x10<sup>-05</sup></a> | <a href="#">2.70x10<sup>-04</sup></a> |

|                      |                            |                             |                                       |                                       |
|----------------------|----------------------------|-----------------------------|---------------------------------------|---------------------------------------|
| <a href="#">1312</a> | <a href="#">AC084346.2</a> | <a href="#">2.558900493</a> | <a href="#">4.98x10<sup>-05</sup></a> | <a href="#">2.71x10<sup>-04</sup></a> |
| <a href="#">1313</a> | <a href="#">AC093248.1</a> | <a href="#">2.014648556</a> | <a href="#">5.01x10<sup>-05</sup></a> | <a href="#">2.73x10<sup>-04</sup></a> |
| <a href="#">1314</a> | <a href="#">AC013400.1</a> | <a href="#">2.044811843</a> | <a href="#">5.03x10<sup>-05</sup></a> | <a href="#">2.74x10<sup>-04</sup></a> |
| <a href="#">1315</a> | <a href="#">AP000477.1</a> | <a href="#">2.665859309</a> | <a href="#">5.04x10<sup>-05</sup></a> | <a href="#">2.74x10<sup>-04</sup></a> |
| <a href="#">1316</a> | <a href="#">AL359095.1</a> | <a href="#">3.969527247</a> | <a href="#">5.10x10<sup>-05</sup></a> | <a href="#">2.77x10<sup>-04</sup></a> |
| <a href="#">1317</a> | <a href="#">LINC02260</a>  | <a href="#">2.859889964</a> | <a href="#">5.14x10<sup>-05</sup></a> | <a href="#">2.79x10<sup>-04</sup></a> |
| <a href="#">1318</a> | <a href="#">AC131971.1</a> | <a href="#">2.250253571</a> | <a href="#">5.18x10<sup>-05</sup></a> | <a href="#">2.81x10<sup>-04</sup></a> |
| <a href="#">1319</a> | <a href="#">AC090709.1</a> | <a href="#">3.241082529</a> | <a href="#">5.35x10<sup>-05</sup></a> | <a href="#">2.88x10<sup>-04</sup></a> |
| <a href="#">1320</a> | <a href="#">AL158035.1</a> | <a href="#">3.734901091</a> | <a href="#">5.44x10<sup>-05</sup></a> | <a href="#">2.92x10<sup>-04</sup></a> |
| <a href="#">1321</a> | <a href="#">AC021218.1</a> | <a href="#">3.249303586</a> | <a href="#">5.45x10<sup>-05</sup></a> | <a href="#">2.93x10<sup>-04</sup></a> |
| <a href="#">1322</a> | <a href="#">AC091212.1</a> | <a href="#">2.243064899</a> | <a href="#">5.48x10<sup>-05</sup></a> | <a href="#">2.94x10<sup>-04</sup></a> |
| <a href="#">1323</a> | <a href="#">AP004608.1</a> | <a href="#">3.237718079</a> | <a href="#">5.56x10<sup>-05</sup></a> | <a href="#">2.98x10<sup>-04</sup></a> |
| <a href="#">1324</a> | <a href="#">AC011518.1</a> | <a href="#">2.537056241</a> | <a href="#">5.84x10<sup>-05</sup></a> | <a href="#">3.11x10<sup>-04</sup></a> |
| <a href="#">1325</a> | <a href="#">AC068726.1</a> | <a href="#">2.266364319</a> | <a href="#">5.88x10<sup>-05</sup></a> | <a href="#">3.13x10<sup>-04</sup></a> |
| <a href="#">1326</a> | <a href="#">AP003472.2</a> | <a href="#">2.520794078</a> | <a href="#">5.97x10<sup>-05</sup></a> | <a href="#">3.17x10<sup>-04</sup></a> |
| <a href="#">1327</a> | <a href="#">AC098936.1</a> | <a href="#">2.591084472</a> | <a href="#">5.98x10<sup>-05</sup></a> | <a href="#">3.18x10<sup>-04</sup></a> |
| <a href="#">1328</a> | <a href="#">AC126407.1</a> | <a href="#">3.214570986</a> | <a href="#">6.01x10<sup>-05</sup></a> | <a href="#">3.19x10<sup>-04</sup></a> |
| <a href="#">1329</a> | <a href="#">AC018541.1</a> | <a href="#">2.698162606</a> | <a href="#">6.12x10<sup>-05</sup></a> | <a href="#">3.24x10<sup>-04</sup></a> |
| <a href="#">1330</a> | <a href="#">AC090802.1</a> | <a href="#">3.448529415</a> | <a href="#">6.14x10<sup>-05</sup></a> | <a href="#">3.25x10<sup>-04</sup></a> |
| <a href="#">1331</a> | <a href="#">AC117500.2</a> | <a href="#">2.555744387</a> | <a href="#">6.32x10<sup>-05</sup></a> | <a href="#">3.34x10<sup>-04</sup></a> |
| <a href="#">1332</a> | <a href="#">AC103409.1</a> | <a href="#">3.741366839</a> | <a href="#">6.33x10<sup>-05</sup></a> | <a href="#">3.34x10<sup>-04</sup></a> |
| <a href="#">1333</a> | <a href="#">AC138965.1</a> | <a href="#">3.367542888</a> | <a href="#">6.36x10<sup>-05</sup></a> | <a href="#">3.36x10<sup>-04</sup></a> |
| <a href="#">1334</a> | <a href="#">U47924.1</a>   | <a href="#">2.086580843</a> | <a href="#">6.38x10<sup>-05</sup></a> | <a href="#">3.36x10<sup>-04</sup></a> |
| <a href="#">1335</a> | <a href="#">LINC02331</a>  | <a href="#">2.402625537</a> | <a href="#">6.40x10<sup>-05</sup></a> | <a href="#">3.37x10<sup>-04</sup></a> |
| <a href="#">1336</a> | <a href="#">AL137224.1</a> | <a href="#">3.128495259</a> | <a href="#">6.50x10<sup>-05</sup></a> | <a href="#">3.42x10<sup>-04</sup></a> |
| <a href="#">1337</a> | <a href="#">LINC01551</a>  | <a href="#">2.90549293</a>  | <a href="#">6.60x10<sup>-05</sup></a> | <a href="#">3.46x10<sup>-04</sup></a> |
| <a href="#">1338</a> | <a href="#">KCNMA1-AS3</a> | <a href="#">2.028384487</a> | <a href="#">6.63x10<sup>-05</sup></a> | <a href="#">3.48x10<sup>-04</sup></a> |
| <a href="#">1339</a> | <a href="#">AC091020.1</a> | <a href="#">3.560742791</a> | <a href="#">6.64x10<sup>-05</sup></a> | <a href="#">3.48x10<sup>-04</sup></a> |



|                      |                             |                             |                                       |                                       |
|----------------------|-----------------------------|-----------------------------|---------------------------------------|---------------------------------------|
| <a href="#">1340</a> | <a href="#">AC016773.1</a>  | <a href="#">2.413199476</a> | <a href="#">6.65x10<sup>-05</sup></a> | <a href="#">3.48x10<sup>-04</sup></a> |
| <a href="#">1341</a> | <a href="#">AL513327.2</a>  | <a href="#">2.330454791</a> | <a href="#">6.80x10<sup>-05</sup></a> | <a href="#">3.56x10<sup>-04</sup></a> |
| <a href="#">1342</a> | <a href="#">AC011676.2</a>  | <a href="#">2.432394405</a> | <a href="#">6.82x10<sup>-05</sup></a> | <a href="#">3.57x10<sup>-04</sup></a> |
| <a href="#">1343</a> | <a href="#">AC084083.1</a>  | <a href="#">2.422635338</a> | <a href="#">6.99x10<sup>-05</sup></a> | <a href="#">3.65x10<sup>-04</sup></a> |
| <a href="#">1344</a> | <a href="#">AC005899.1</a>  | <a href="#">2.275609523</a> | <a href="#">7.00x10<sup>-05</sup></a> | <a href="#">3.65x10<sup>-04</sup></a> |
| <a href="#">1345</a> | <a href="#">AC010745.4</a>  | <a href="#">2.041176546</a> | <a href="#">7.23x10<sup>-05</sup></a> | <a href="#">3.76x10<sup>-04</sup></a> |
| <a href="#">1346</a> | <a href="#">AC004944.1</a>  | <a href="#">2.40644277</a>  | <a href="#">7.28x10<sup>-05</sup></a> | <a href="#">3.78x10<sup>-04</sup></a> |
| <a href="#">1347</a> | <a href="#">DANT1</a>       | <a href="#">2.388921333</a> | <a href="#">7.29x10<sup>-05</sup></a> | <a href="#">3.78x10<sup>-04</sup></a> |
| <a href="#">1348</a> | <a href="#">AC103769.1</a>  | <a href="#">2.253707568</a> | <a href="#">7.29x10<sup>-05</sup></a> | <a href="#">3.79x10<sup>-04</sup></a> |
| <a href="#">1349</a> | <a href="#">GS1-594A7.3</a> | <a href="#">2.92728843</a>  | <a href="#">7.30x10<sup>-05</sup></a> | <a href="#">3.79x10<sup>-04</sup></a> |
| <a href="#">1350</a> | <a href="#">AC096543.1</a>  | <a href="#">3.095488383</a> | <a href="#">7.35x10<sup>-05</sup></a> | <a href="#">3.81x10<sup>-04</sup></a> |
| <a href="#">1351</a> | <a href="#">AC091544.7</a>  | <a href="#">2.102759605</a> | <a href="#">7.36x10<sup>-05</sup></a> | <a href="#">3.81x10<sup>-04</sup></a> |
| <a href="#">1352</a> | <a href="#">LINC02266</a>   | <a href="#">3.3947852</a>   | <a href="#">7.55x10<sup>-05</sup></a> | <a href="#">3.90x10<sup>-04</sup></a> |
| <a href="#">1353</a> | <a href="#">FGF12-AS2</a>   | <a href="#">2.854936058</a> | <a href="#">7.62x10<sup>-05</sup></a> | <a href="#">3.93x10<sup>-04</sup></a> |
| <a href="#">1354</a> | <a href="#">AC013652.1</a>  | <a href="#">2.744511994</a> | <a href="#">7.69x10<sup>-05</sup></a> | <a href="#">3.97x10<sup>-04</sup></a> |
| <a href="#">1355</a> | <a href="#">AA06</a>        | <a href="#">2.571840017</a> | <a href="#">7.70x10<sup>-05</sup></a> | <a href="#">3.97x10<sup>-04</sup></a> |
| <a href="#">1356</a> | <a href="#">ZBTB20-AS1</a>  | <a href="#">2.549817371</a> | <a href="#">7.71x10<sup>-05</sup></a> | <a href="#">3.97x10<sup>-04</sup></a> |
| <a href="#">1357</a> | <a href="#">LINC01607</a>   | <a href="#">2.743473418</a> | <a href="#">7.86x10<sup>-05</sup></a> | <a href="#">4.04x10<sup>-04</sup></a> |
| <a href="#">1358</a> | <a href="#">AC011005.4</a>  | <a href="#">2.330844974</a> | <a href="#">7.94x10<sup>-05</sup></a> | <a href="#">4.07x10<sup>-04</sup></a> |
| <a href="#">1359</a> | <a href="#">AC148476.1</a>  | <a href="#">2.206756552</a> | <a href="#">7.97x10<sup>-05</sup></a> | <a href="#">4.09x10<sup>-04</sup></a> |
| <a href="#">1360</a> | <a href="#">AC008443.3</a>  | <a href="#">3.053690845</a> | <a href="#">8.06x10<sup>-05</sup></a> | <a href="#">4.13x10<sup>-04</sup></a> |
| <a href="#">1361</a> | <a href="#">EGOT</a>        | <a href="#">2.776659408</a> | <a href="#">8.06x10<sup>-05</sup></a> | <a href="#">4.13x10<sup>-04</sup></a> |
| <a href="#">1362</a> | <a href="#">LINC02195</a>   | <a href="#">2.234143382</a> | <a href="#">8.09x10<sup>-05</sup></a> | <a href="#">4.15x10<sup>-04</sup></a> |
| <a href="#">1363</a> | <a href="#">AC211433.1</a>  | <a href="#">2.372077566</a> | <a href="#">8.12x10<sup>-05</sup></a> | <a href="#">4.16x10<sup>-04</sup></a> |
| <a href="#">1364</a> | <a href="#">AC006262.1</a>  | <a href="#">2.741936467</a> | <a href="#">8.41x10<sup>-05</sup></a> | <a href="#">4.29x10<sup>-04</sup></a> |
| <a href="#">1365</a> | <a href="#">AL662799.1</a>  | <a href="#">2.26673052</a>  | <a href="#">8.67x10<sup>-05</sup></a> | <a href="#">4.41x10<sup>-04</sup></a> |
| <a href="#">1366</a> | <a href="#">LINC00319</a>   | <a href="#">2.150119565</a> | <a href="#">8.71x10<sup>-05</sup></a> | <a href="#">4.43x10<sup>-04</sup></a> |
| <a href="#">1367</a> | <a href="#">AC025211.1</a>  | <a href="#">3.13305857</a>  | <a href="#">8.76x10<sup>-05</sup></a> | <a href="#">4.45x10<sup>-04</sup></a> |

|                      |                             |                             |                                       |                                       |
|----------------------|-----------------------------|-----------------------------|---------------------------------------|---------------------------------------|
| <a href="#">1368</a> | <a href="#">H19</a>         | <a href="#">4.291648466</a> | <a href="#">8.78x10<sup>-05</sup></a> | <a href="#">4.46x10<sup>-04</sup></a> |
| <a href="#">1369</a> | <a href="#">AC007250.1</a>  | <a href="#">3.007378987</a> | <a href="#">8.80x10<sup>-05</sup></a> | <a href="#">4.46x10<sup>-04</sup></a> |
| <a href="#">1370</a> | <a href="#">LINC00616</a>   | <a href="#">2.338270123</a> | <a href="#">8.85x10<sup>-05</sup></a> | <a href="#">4.48x10<sup>-04</sup></a> |
| <a href="#">1371</a> | <a href="#">AC091096.2</a>  | <a href="#">2.736499867</a> | <a href="#">8.90x10<sup>-05</sup></a> | <a href="#">4.50x10<sup>-04</sup></a> |
| <a href="#">1372</a> | <a href="#">PCAT7</a>       | <a href="#">2.578330529</a> | <a href="#">8.96x10<sup>-05</sup></a> | <a href="#">4.53x10<sup>-04</sup></a> |
| <a href="#">1373</a> | <a href="#">AC145146.2</a>  | <a href="#">2.712772687</a> | <a href="#">8.99x10<sup>-05</sup></a> | <a href="#">4.55x10<sup>-04</sup></a> |
| <a href="#">1374</a> | <a href="#">AC021683.3</a>  | <a href="#">2.564436052</a> | <a href="#">9.01x10<sup>-05</sup></a> | <a href="#">4.55x10<sup>-04</sup></a> |
| <a href="#">1375</a> | <a href="#">AL109615.3</a>  | <a href="#">3.293294449</a> | <a href="#">9.04x10<sup>-05</sup></a> | <a href="#">4.56x10<sup>-04</sup></a> |
| <a href="#">1376</a> | <a href="#">AC026391.1</a>  | <a href="#">2.3268792</a>   | <a href="#">9.04x10<sup>-05</sup></a> | <a href="#">4.56x10<sup>-04</sup></a> |
| <a href="#">1377</a> | <a href="#">AC099850.3</a>  | <a href="#">2.582329962</a> | <a href="#">9.11x10<sup>-05</sup></a> | <a href="#">4.58x10<sup>-04</sup></a> |
| <a href="#">1378</a> | <a href="#">AC117382.2</a>  | <a href="#">2.206801744</a> | <a href="#">9.11x10<sup>-05</sup></a> | <a href="#">4.58x10<sup>-04</sup></a> |
| <a href="#">1379</a> | <a href="#">AC006148.1</a>  | <a href="#">3.466487024</a> | <a href="#">9.27x10<sup>-05</sup></a> | <a href="#">4.65x10<sup>-04</sup></a> |
| <a href="#">1380</a> | <a href="#">FIRRE</a>       | <a href="#">2.808305662</a> | <a href="#">9.33x10<sup>-05</sup></a> | <a href="#">4.69x10<sup>-04</sup></a> |
| <a href="#">1381</a> | <a href="#">AL590006.1</a>  | <a href="#">2.348430882</a> | <a href="#">9.34x10<sup>-05</sup></a> | <a href="#">4.69x10<sup>-04</sup></a> |
| <a href="#">1382</a> | <a href="#">AC069542.1</a>  | <a href="#">2.173578987</a> | <a href="#">9.91x10<sup>-05</sup></a> | <a href="#">4.94x10<sup>-04</sup></a> |
| <a href="#">1383</a> | <a href="#">AL139002.1</a>  | <a href="#">3.420162672</a> | <a href="#">9.91x10<sup>-05</sup></a> | <a href="#">4.94x10<sup>-04</sup></a> |
| <a href="#">1384</a> | <a href="#">CSE1L-AS1</a>   | <a href="#">2.026242736</a> | <a href="#">1.03x10<sup>-04</sup></a> | <a href="#">5.12x10<sup>-04</sup></a> |
| <a href="#">1385</a> | <a href="#">CYP4F26P</a>    | <a href="#">2.189142096</a> | <a href="#">1.03x10<sup>-04</sup></a> | <a href="#">5.14x10<sup>-04</sup></a> |
| <a href="#">1386</a> | <a href="#">TBL1XR1-AS1</a> | <a href="#">3.027543125</a> | <a href="#">1.04x10<sup>-04</sup></a> | <a href="#">5.17x10<sup>-04</sup></a> |
| <a href="#">1387</a> | <a href="#">AC004817.2</a>  | <a href="#">2.00931566</a>  | <a href="#">1.05x10<sup>-04</sup></a> | <a href="#">5.19x10<sup>-04</sup></a> |
| <a href="#">1388</a> | <a href="#">AL096828.3</a>  | <a href="#">2.43317243</a>  | <a href="#">1.05x10<sup>-04</sup></a> | <a href="#">5.19x10<sup>-04</sup></a> |
| <a href="#">1389</a> | <a href="#">HIF1A-AS2</a>   | <a href="#">2.120776578</a> | <a href="#">1.06x10<sup>-04</sup></a> | <a href="#">5.23x10<sup>-04</sup></a> |
| <a href="#">1390</a> | <a href="#">LINC01553</a>   | <a href="#">2.27454424</a>  | <a href="#">1.06x10<sup>-04</sup></a> | <a href="#">5.25x10<sup>-04</sup></a> |
| <a href="#">1391</a> | <a href="#">LINC02468</a>   | <a href="#">2.936508102</a> | <a href="#">1.06x10<sup>-04</sup></a> | <a href="#">5.26x10<sup>-04</sup></a> |
| <a href="#">1392</a> | <a href="#">LINC00543</a>   | <a href="#">2.08805492</a>  | <a href="#">1.08x10<sup>-04</sup></a> | <a href="#">5.35x10<sup>-04</sup></a> |
| <a href="#">1393</a> | <a href="#">AC124067.4</a>  | <a href="#">2.367583195</a> | <a href="#">1.09x10<sup>-04</sup></a> | <a href="#">5.39x10<sup>-04</sup></a> |
| <a href="#">1394</a> | <a href="#">AL121901.1</a>  | <a href="#">3.286579241</a> | <a href="#">1.10x10<sup>-04</sup></a> | <a href="#">5.42x10<sup>-04</sup></a> |
| <a href="#">1395</a> | <a href="#">Z84485.1</a>    | <a href="#">2.571535</a>    | <a href="#">1.11x10<sup>-04</sup></a> | <a href="#">5.46x10<sup>-04</sup></a> |

|                      |                            |                             |                                       |                                       |
|----------------------|----------------------------|-----------------------------|---------------------------------------|---------------------------------------|
| <a href="#">1396</a> | <a href="#">Z99755.3</a>   | <a href="#">2.912941953</a> | <a href="#">1.12x10<sup>-04</sup></a> | <a href="#">5.49x10<sup>-04</sup></a> |
| <a href="#">1397</a> | <a href="#">U62317.2</a>   | <a href="#">3.032482302</a> | <a href="#">1.16x10<sup>-04</sup></a> | <a href="#">5.70x10<sup>-04</sup></a> |
| <a href="#">1398</a> | <a href="#">AC010547.2</a> | <a href="#">2.938003681</a> | <a href="#">1.18x10<sup>-04</sup></a> | <a href="#">5.76x10<sup>-04</sup></a> |
| <a href="#">1399</a> | <a href="#">AP003390.1</a> | <a href="#">2.448329477</a> | <a href="#">1.18x10<sup>-04</sup></a> | <a href="#">5.76x10<sup>-04</sup></a> |
| <a href="#">1400</a> | <a href="#">AC025183.2</a> | <a href="#">3.41573039</a>  | <a href="#">1.19x10<sup>-04</sup></a> | <a href="#">5.78x10<sup>-04</sup></a> |
| <a href="#">1401</a> | <a href="#">AC034229.4</a> | <a href="#">2.012400026</a> | <a href="#">1.19x10<sup>-04</sup></a> | <a href="#">5.79x10<sup>-04</sup></a> |
| <a href="#">1402</a> | <a href="#">LINC01356</a>  | <a href="#">2.692856091</a> | <a href="#">1.20x10<sup>-04</sup></a> | <a href="#">5.83x10<sup>-04</sup></a> |
| <a href="#">1403</a> | <a href="#">AC015574.1</a> | <a href="#">3.991591168</a> | <a href="#">1.21x10<sup>-04</sup></a> | <a href="#">5.85x10<sup>-04</sup></a> |
| <a href="#">1404</a> | <a href="#">AC129926.1</a> | <a href="#">2.885166006</a> | <a href="#">1.21x10<sup>-04</sup></a> | <a href="#">5.89x10<sup>-04</sup></a> |
| <a href="#">1405</a> | <a href="#">AC136424.1</a> | <a href="#">2.934577077</a> | <a href="#">1.22x10<sup>-04</sup></a> | <a href="#">5.90x10<sup>-04</sup></a> |
| <a href="#">1406</a> | <a href="#">LUARIS</a>     | <a href="#">2.489280937</a> | <a href="#">1.22x10<sup>-04</sup></a> | <a href="#">5.90x10<sup>-04</sup></a> |
| <a href="#">1407</a> | <a href="#">AC108058.1</a> | <a href="#">2.671674973</a> | <a href="#">1.22x10<sup>-04</sup></a> | <a href="#">5.91x10<sup>-04</sup></a> |
| <a href="#">1408</a> | <a href="#">AL731533.2</a> | <a href="#">2.35656585</a>  | <a href="#">1.23x10<sup>-04</sup></a> | <a href="#">5.96x10<sup>-04</sup></a> |
| <a href="#">1409</a> | <a href="#">AC062028.1</a> | <a href="#">2.270557724</a> | <a href="#">1.23x10<sup>-04</sup></a> | <a href="#">5.96x10<sup>-04</sup></a> |
| <a href="#">1410</a> | <a href="#">AC004882.1</a> | <a href="#">2.189855389</a> | <a href="#">1.27x10<sup>-04</sup></a> | <a href="#">6.10x10<sup>-04</sup></a> |
| <a href="#">1411</a> | <a href="#">LINC01344</a>  | <a href="#">2.641340323</a> | <a href="#">1.27x10<sup>-04</sup></a> | <a href="#">6.12x10<sup>-04</sup></a> |
| <a href="#">1412</a> | <a href="#">AC104958.1</a> | <a href="#">2.142807501</a> | <a href="#">1.27x10<sup>-04</sup></a> | <a href="#">6.12x10<sup>-04</sup></a> |
| <a href="#">1413</a> | <a href="#">AC005722.2</a> | <a href="#">2.388131687</a> | <a href="#">1.30x10<sup>-04</sup></a> | <a href="#">6.22x10<sup>-04</sup></a> |
| <a href="#">1414</a> | <a href="#">LINC01809</a>  | <a href="#">2.333470134</a> | <a href="#">1.31x10<sup>-04</sup></a> | <a href="#">6.29x10<sup>-04</sup></a> |
| <a href="#">1415</a> | <a href="#">AC092059.1</a> | <a href="#">2.178577881</a> | <a href="#">1.38x10<sup>-04</sup></a> | <a href="#">6.58x10<sup>-04</sup></a> |
| <a href="#">1416</a> | <a href="#">AC005699.1</a> | <a href="#">2.051160592</a> | <a href="#">1.39x10<sup>-04</sup></a> | <a href="#">6.60x10<sup>-04</sup></a> |
| <a href="#">1417</a> | <a href="#">AC090774.4</a> | <a href="#">3.232053286</a> | <a href="#">1.39x10<sup>-04</sup></a> | <a href="#">6.63x10<sup>-04</sup></a> |
| <a href="#">1418</a> | <a href="#">TDRKH-AS1</a>  | <a href="#">2.156557004</a> | <a href="#">1.41x10<sup>-04</sup></a> | <a href="#">6.71x10<sup>-04</sup></a> |
| <a href="#">1419</a> | <a href="#">AC144450.1</a> | <a href="#">2.618486082</a> | <a href="#">1.42x10<sup>-04</sup></a> | <a href="#">6.72x10<sup>-04</sup></a> |
| <a href="#">1420</a> | <a href="#">AC092143.4</a> | <a href="#">2.182821747</a> | <a href="#">1.42x10<sup>-04</sup></a> | <a href="#">6.74x10<sup>-04</sup></a> |
| <a href="#">1421</a> | <a href="#">C10orf91</a>   | <a href="#">2.312678221</a> | <a href="#">1.44x10<sup>-04</sup></a> | <a href="#">6.82x10<sup>-04</sup></a> |
| <a href="#">1422</a> | <a href="#">AC138761.4</a> | <a href="#">2.205042399</a> | <a href="#">1.44x10<sup>-04</sup></a> | <a href="#">6.82x10<sup>-04</sup></a> |
| <a href="#">1423</a> | <a href="#">AL133551.1</a> | <a href="#">2.206905506</a> | <a href="#">1.45x10<sup>-04</sup></a> | <a href="#">6.84x10<sup>-04</sup></a> |

|                      |                            |                             |                                       |                                       |
|----------------------|----------------------------|-----------------------------|---------------------------------------|---------------------------------------|
| <a href="#">1424</a> | <a href="#">LINC00200</a>  | <a href="#">3.762718106</a> | <a href="#">1.46x10<sup>-04</sup></a> | <a href="#">6.91x10<sup>-04</sup></a> |
| <a href="#">1425</a> | <a href="#">AC092171.4</a> | <a href="#">2.392691108</a> | <a href="#">1.47x10<sup>-04</sup></a> | <a href="#">6.95x10<sup>-04</sup></a> |
| <a href="#">1426</a> | <a href="#">AL020995.1</a> | <a href="#">2.304725662</a> | <a href="#">1.48x10<sup>-04</sup></a> | <a href="#">6.98x10<sup>-04</sup></a> |
| <a href="#">1427</a> | <a href="#">AP003108.1</a> | <a href="#">2.755693335</a> | <a href="#">1.50x10<sup>-04</sup></a> | <a href="#">7.08x10<sup>-04</sup></a> |
| <a href="#">1428</a> | <a href="#">AC061975.8</a> | <a href="#">2.245982618</a> | <a href="#">1.52x10<sup>-04</sup></a> | <a href="#">7.15x10<sup>-04</sup></a> |
| <a href="#">1429</a> | <a href="#">LINC00943</a>  | <a href="#">2.215330147</a> | <a href="#">1.52x10<sup>-04</sup></a> | <a href="#">7.17x10<sup>-04</sup></a> |
| <a href="#">1430</a> | <a href="#">LINC01393</a>  | <a href="#">2.301424254</a> | <a href="#">1.53x10<sup>-04</sup></a> | <a href="#">7.20x10<sup>-04</sup></a> |
| <a href="#">1431</a> | <a href="#">AC090541.1</a> | <a href="#">3.385808892</a> | <a href="#">1.53x10<sup>-04</sup></a> | <a href="#">7.21x10<sup>-04</sup></a> |
| <a href="#">1432</a> | <a href="#">AC096734.1</a> | <a href="#">2.534031249</a> | <a href="#">1.55x10<sup>-04</sup></a> | <a href="#">7.26x10<sup>-04</sup></a> |
| <a href="#">1433</a> | <a href="#">LINC00691</a>  | <a href="#">2.080284094</a> | <a href="#">1.55x10<sup>-04</sup></a> | <a href="#">7.28x10<sup>-04</sup></a> |
| <a href="#">1434</a> | <a href="#">AC025176.1</a> | <a href="#">2.289859183</a> | <a href="#">1.57x10<sup>-04</sup></a> | <a href="#">7.34x10<sup>-04</sup></a> |
| <a href="#">1435</a> | <a href="#">AC000061.1</a> | <a href="#">3.754108809</a> | <a href="#">1.57x10<sup>-04</sup></a> | <a href="#">7.34x10<sup>-04</sup></a> |
| <a href="#">1436</a> | <a href="#">AC138393.3</a> | <a href="#">2.163436852</a> | <a href="#">1.60x10<sup>-04</sup></a> | <a href="#">7.48x10<sup>-04</sup></a> |
| <a href="#">1437</a> | <a href="#">UBE2Q1-AS1</a> | <a href="#">2.226010865</a> | <a href="#">1.63x10<sup>-04</sup></a> | <a href="#">7.60x10<sup>-04</sup></a> |
| <a href="#">1438</a> | <a href="#">ARNTL2-AS1</a> | <a href="#">2.828733247</a> | <a href="#">1.64x10<sup>-04</sup></a> | <a href="#">7.62x10<sup>-04</sup></a> |
| <a href="#">1439</a> | <a href="#">AC007750.1</a> | <a href="#">2.377843937</a> | <a href="#">1.64x10<sup>-04</sup></a> | <a href="#">7.63x10<sup>-04</sup></a> |
| <a href="#">1440</a> | <a href="#">AC107463.2</a> | <a href="#">2.209302472</a> | <a href="#">1.67x10<sup>-04</sup></a> | <a href="#">7.76x10<sup>-04</sup></a> |
| <a href="#">1441</a> | <a href="#">MIR9-3HG</a>   | <a href="#">3.236986942</a> | <a href="#">1.70x10<sup>-04</sup></a> | <a href="#">7.88x10<sup>-04</sup></a> |
| <a href="#">1442</a> | <a href="#">LINC-ROR</a>   | <a href="#">2.598405282</a> | <a href="#">1.71x10<sup>-04</sup></a> | <a href="#">7.91x10<sup>-04</sup></a> |
| <a href="#">1443</a> | <a href="#">LINC00269</a>  | <a href="#">2.052917798</a> | <a href="#">1.73x10<sup>-04</sup></a> | <a href="#">8.00x10<sup>-04</sup></a> |
| <a href="#">1444</a> | <a href="#">AC084026.2</a> | <a href="#">2.711600722</a> | <a href="#">1.77x10<sup>-04</sup></a> | <a href="#">8.16x10<sup>-04</sup></a> |
| <a href="#">1445</a> | <a href="#">AC073941.1</a> | <a href="#">2.848087536</a> | <a href="#">1.77x10<sup>-04</sup></a> | <a href="#">8.17x10<sup>-04</sup></a> |
| <a href="#">1446</a> | <a href="#">AP003781.1</a> | <a href="#">2.360749622</a> | <a href="#">1.77x10<sup>-04</sup></a> | <a href="#">8.17x10<sup>-04</sup></a> |
| <a href="#">1447</a> | <a href="#">OVAAL</a>      | <a href="#">3.384430943</a> | <a href="#">1.78x10<sup>-04</sup></a> | <a href="#">8.20x10<sup>-04</sup></a> |
| <a href="#">1448</a> | <a href="#">LINC01605</a>  | <a href="#">2.41967797</a>  | <a href="#">1.79x10<sup>-04</sup></a> | <a href="#">8.24x10<sup>-04</sup></a> |
| <a href="#">1449</a> | <a href="#">AP003680.1</a> | <a href="#">2.099583097</a> | <a href="#">1.83x10<sup>-04</sup></a> | <a href="#">8.39x10<sup>-04</sup></a> |
| <a href="#">1450</a> | <a href="#">AL445193.2</a> | <a href="#">2.062321878</a> | <a href="#">1.83x10<sup>-04</sup></a> | <a href="#">8.39x10<sup>-04</sup></a> |
| <a href="#">1451</a> | <a href="#">AC011287.2</a> | <a href="#">3.110525348</a> | <a href="#">1.83x10<sup>-04</sup></a> | <a href="#">8.41x10<sup>-04</sup></a> |

|                      |                             |                             |                                       |                                       |
|----------------------|-----------------------------|-----------------------------|---------------------------------------|---------------------------------------|
| <a href="#">1452</a> | <a href="#">AC022211.1</a>  | <a href="#">2.084450562</a> | <a href="#">1.86x10<sup>-04</sup></a> | <a href="#">8.50x10<sup>-04</sup></a> |
| <a href="#">1453</a> | <a href="#">AL118505.1</a>  | <a href="#">2.418660677</a> | <a href="#">1.86x10<sup>-04</sup></a> | <a href="#">8.52x10<sup>-04</sup></a> |
| <a href="#">1454</a> | <a href="#">AC078906.1</a>  | <a href="#">2.248751427</a> | <a href="#">1.88x10<sup>-04</sup></a> | <a href="#">8.59x10<sup>-04</sup></a> |
| <a href="#">1455</a> | <a href="#">AC093702.1</a>  | <a href="#">2.11584309</a>  | <a href="#">1.88x10<sup>-04</sup></a> | <a href="#">8.59x10<sup>-04</sup></a> |
| <a href="#">1456</a> | <a href="#">LINC01502</a>   | <a href="#">2.532159367</a> | <a href="#">1.88x10<sup>-04</sup></a> | <a href="#">8.59x10<sup>-04</sup></a> |
| <a href="#">1457</a> | <a href="#">ZNF252P-AS1</a> | <a href="#">2.317545842</a> | <a href="#">1.89x10<sup>-04</sup></a> | <a href="#">8.61x10<sup>-04</sup></a> |
| <a href="#">1458</a> | <a href="#">AC009084.1</a>  | <a href="#">2.042149314</a> | <a href="#">1.90x10<sup>-04</sup></a> | <a href="#">8.65x10<sup>-04</sup></a> |
| <a href="#">1459</a> | <a href="#">AL078601.2</a>  | <a href="#">2.8976178</a>   | <a href="#">1.91x10<sup>-04</sup></a> | <a href="#">8.69x10<sup>-04</sup></a> |
| <a href="#">1460</a> | <a href="#">LINC02257</a>   | <a href="#">2.297304468</a> | <a href="#">1.91x10<sup>-04</sup></a> | <a href="#">8.71x10<sup>-04</sup></a> |
| <a href="#">1461</a> | <a href="#">AC011396.1</a>  | <a href="#">2.176722571</a> | <a href="#">1.92x10<sup>-04</sup></a> | <a href="#">8.72x10<sup>-04</sup></a> |
| <a href="#">1462</a> | <a href="#">AC244205.1</a>  | <a href="#">2.431824364</a> | <a href="#">1.93x10<sup>-04</sup></a> | <a href="#">8.75x10<sup>-04</sup></a> |
| <a href="#">1463</a> | <a href="#">AC018552.4</a>  | <a href="#">2.426500817</a> | <a href="#">1.93x10<sup>-04</sup></a> | <a href="#">8.77x10<sup>-04</sup></a> |
| <a href="#">1464</a> | <a href="#">AP003472.1</a>  | <a href="#">2.35477981</a>  | <a href="#">1.95x10<sup>-04</sup></a> | <a href="#">8.84x10<sup>-04</sup></a> |
| <a href="#">1465</a> | <a href="#">AC100821.2</a>  | <a href="#">2.180226656</a> | <a href="#">1.97x10<sup>-04</sup></a> | <a href="#">8.91x10<sup>-04</sup></a> |
| <a href="#">1466</a> | <a href="#">LINC01913</a>   | <a href="#">3.068367228</a> | <a href="#">1.99x10<sup>-04</sup></a> | <a href="#">9.02x10<sup>-04</sup></a> |
| <a href="#">1467</a> | <a href="#">AP001429.1</a>  | <a href="#">2.37866874</a>  | <a href="#">2.00x10<sup>-04</sup></a> | <a href="#">9.04x10<sup>-04</sup></a> |
| <a href="#">1468</a> | <a href="#">LINC01322</a>   | <a href="#">3.52131115</a>  | <a href="#">2.01x10<sup>-04</sup></a> | <a href="#">9.07x10<sup>-04</sup></a> |
| <a href="#">1469</a> | <a href="#">AC011601.1</a>  | <a href="#">2.474362219</a> | <a href="#">2.02x10<sup>-04</sup></a> | <a href="#">9.14x10<sup>-04</sup></a> |
| <a href="#">1470</a> | <a href="#">AC012379.1</a>  | <a href="#">2.057298052</a> | <a href="#">2.05x10<sup>-04</sup></a> | <a href="#">9.25x10<sup>-04</sup></a> |
| <a href="#">1471</a> | <a href="#">TRIM31-AS1</a>  | <a href="#">2.533948316</a> | <a href="#">2.12x10<sup>-04</sup></a> | <a href="#">9.55x10<sup>-04</sup></a> |
| <a href="#">1472</a> | <a href="#">AL162574.2</a>  | <a href="#">2.138808182</a> | <a href="#">2.12x10<sup>-04</sup></a> | <a href="#">9.55x10<sup>-04</sup></a> |
| <a href="#">1473</a> | <a href="#">AC026250.1</a>  | <a href="#">2.433760254</a> | <a href="#">2.15x10<sup>-04</sup></a> | <a href="#">9.66x10<sup>-04</sup></a> |
| <a href="#">1474</a> | <a href="#">AC100774.1</a>  | <a href="#">2.388540806</a> | <a href="#">2.15x10<sup>-04</sup></a> | <a href="#">9.66x10<sup>-04</sup></a> |
| <a href="#">1475</a> | <a href="#">AC024267.5</a>  | <a href="#">2.169638486</a> | <a href="#">2.16x10<sup>-04</sup></a> | <a href="#">9.68x10<sup>-04</sup></a> |
| <a href="#">1476</a> | <a href="#">AL513412.1</a>  | <a href="#">2.472212934</a> | <a href="#">2.19x10<sup>-04</sup></a> | <a href="#">9.81x10<sup>-04</sup></a> |
| <a href="#">1477</a> | <a href="#">AL163973.2</a>  | <a href="#">2.165414745</a> | <a href="#">2.20x10<sup>-04</sup></a> | <a href="#">9.84x10<sup>-04</sup></a> |
| <a href="#">1478</a> | <a href="#">LINC02322</a>   | <a href="#">2.785487043</a> | <a href="#">2.25x10<sup>-04</sup></a> | <a href="#">1.01x10<sup>-03</sup></a> |
| <a href="#">1479</a> | <a href="#">AL132719.1</a>  | <a href="#">2.277988834</a> | <a href="#">2.25x10<sup>-04</sup></a> | <a href="#">1.01x10<sup>-03</sup></a> |

|                      |                             |                             |                                       |                                       |
|----------------------|-----------------------------|-----------------------------|---------------------------------------|---------------------------------------|
| <a href="#">1480</a> | <a href="#">PCDH9-AS3</a>   | <a href="#">2.172045007</a> | <a href="#">2.28x10<sup>-04</sup></a> | <a href="#">1.01x10<sup>-03</sup></a> |
| <a href="#">1481</a> | <a href="#">LINC01583</a>   | <a href="#">2.448551907</a> | <a href="#">2.28x10<sup>-04</sup></a> | <a href="#">1.02x10<sup>-03</sup></a> |
| <a href="#">1482</a> | <a href="#">AP005264.4</a>  | <a href="#">2.319164723</a> | <a href="#">2.31x10<sup>-04</sup></a> | <a href="#">1.03x10<sup>-03</sup></a> |
| <a href="#">1483</a> | <a href="#">AL121852.1</a>  | <a href="#">2.166382797</a> | <a href="#">2.32x10<sup>-04</sup></a> | <a href="#">1.03x10<sup>-03</sup></a> |
| <a href="#">1484</a> | <a href="#">AC092811.1</a>  | <a href="#">2.388487133</a> | <a href="#">2.36x10<sup>-04</sup></a> | <a href="#">1.05x10<sup>-03</sup></a> |
| <a href="#">1485</a> | <a href="#">AC104823.1</a>  | <a href="#">2.387037256</a> | <a href="#">2.37x10<sup>-04</sup></a> | <a href="#">1.05x10<sup>-03</sup></a> |
| <a href="#">1486</a> | <a href="#">AL158835.2</a>  | <a href="#">2.033230615</a> | <a href="#">2.38x10<sup>-04</sup></a> | <a href="#">1.06x10<sup>-03</sup></a> |
| <a href="#">1487</a> | <a href="#">AC105137.3</a>  | <a href="#">2.106703865</a> | <a href="#">2.40x10<sup>-04</sup></a> | <a href="#">1.06x10<sup>-03</sup></a> |
| <a href="#">1488</a> | <a href="#">AP000593.3</a>  | <a href="#">2.085446852</a> | <a href="#">2.42x10<sup>-04</sup></a> | <a href="#">1.07x10<sup>-03</sup></a> |
| <a href="#">1489</a> | <a href="#">AC092828.1</a>  | <a href="#">2.240221903</a> | <a href="#">2.43x10<sup>-04</sup></a> | <a href="#">1.07x10<sup>-03</sup></a> |
| <a href="#">1490</a> | <a href="#">LINC00342</a>   | <a href="#">2.247704727</a> | <a href="#">2.46x10<sup>-04</sup></a> | <a href="#">1.09x10<sup>-03</sup></a> |
| <a href="#">1491</a> | <a href="#">LINC01600</a>   | <a href="#">2.257016722</a> | <a href="#">2.46x10<sup>-04</sup></a> | <a href="#">1.09x10<sup>-03</sup></a> |
| <a href="#">1492</a> | <a href="#">AC004637.1</a>  | <a href="#">2.085290671</a> | <a href="#">2.49x10<sup>-04</sup></a> | <a href="#">1.10x10<sup>-03</sup></a> |
| <a href="#">1493</a> | <a href="#">AC092769.1</a>  | <a href="#">3.049490334</a> | <a href="#">2.53x10<sup>-04</sup></a> | <a href="#">1.12x10<sup>-03</sup></a> |
| <a href="#">1494</a> | <a href="#">AC008667.1</a>  | <a href="#">2.296413722</a> | <a href="#">2.54x10<sup>-04</sup></a> | <a href="#">1.12x10<sup>-03</sup></a> |
| <a href="#">1495</a> | <a href="#">AL360091.2</a>  | <a href="#">3.1917994</a>   | <a href="#">2.54x10<sup>-04</sup></a> | <a href="#">1.12x10<sup>-03</sup></a> |
| <a href="#">1496</a> | <a href="#">AC025521.1</a>  | <a href="#">2.754771614</a> | <a href="#">2.62x10<sup>-04</sup></a> | <a href="#">1.15x10<sup>-03</sup></a> |
| <a href="#">1497</a> | <a href="#">LINC01360</a>   | <a href="#">2.266861299</a> | <a href="#">2.62x10<sup>-04</sup></a> | <a href="#">1.15x10<sup>-03</sup></a> |
| <a href="#">1498</a> | <a href="#">AC110769.2</a>  | <a href="#">2.067108943</a> | <a href="#">2.62x10<sup>-04</sup></a> | <a href="#">1.15x10<sup>-03</sup></a> |
| <a href="#">1499</a> | <a href="#">AC008554.1</a>  | <a href="#">2.621076104</a> | <a href="#">2.63x10<sup>-04</sup></a> | <a href="#">1.15x10<sup>-03</sup></a> |
| <a href="#">1500</a> | <a href="#">AL591501.1</a>  | <a href="#">2.988132385</a> | <a href="#">2.65x10<sup>-04</sup></a> | <a href="#">1.16x10<sup>-03</sup></a> |
| <a href="#">1501</a> | <a href="#">AC021683.1</a>  | <a href="#">2.768879946</a> | <a href="#">2.69x10<sup>-04</sup></a> | <a href="#">1.17x10<sup>-03</sup></a> |
| <a href="#">1502</a> | <a href="#">AC090707.1</a>  | <a href="#">2.20007063</a>  | <a href="#">2.70x10<sup>-04</sup></a> | <a href="#">1.18x10<sup>-03</sup></a> |
| <a href="#">1503</a> | <a href="#">AP000462.2</a>  | <a href="#">2.545944263</a> | <a href="#">2.79x10<sup>-04</sup></a> | <a href="#">1.21x10<sup>-03</sup></a> |
| <a href="#">1504</a> | <a href="#">AL356299.2</a>  | <a href="#">2.127332118</a> | <a href="#">2.82x10<sup>-04</sup></a> | <a href="#">1.22x10<sup>-03</sup></a> |
| <a href="#">1505</a> | <a href="#">AC122138.1</a>  | <a href="#">2.158167775</a> | <a href="#">2.83x10<sup>-04</sup></a> | <a href="#">1.23x10<sup>-03</sup></a> |
| <a href="#">1506</a> | <a href="#">SLC12A9-AS1</a> | <a href="#">2.264880674</a> | <a href="#">2.84x10<sup>-04</sup></a> | <a href="#">1.23x10<sup>-03</sup></a> |
| <a href="#">1507</a> | <a href="#">AC093520.1</a>  | <a href="#">2.296232674</a> | <a href="#">2.86x10<sup>-04</sup></a> | <a href="#">1.24x10<sup>-03</sup></a> |

|                      |                            |                             |                                       |                                       |
|----------------------|----------------------------|-----------------------------|---------------------------------------|---------------------------------------|
| <a href="#">1508</a> | <a href="#">CU634019.6</a> | <a href="#">2.45097558</a>  | <a href="#">2.87x10<sup>-04</sup></a> | <a href="#">1.24x10<sup>-03</sup></a> |
| <a href="#">1509</a> | <a href="#">LINC02227</a>  | <a href="#">2.018775875</a> | <a href="#">2.90x10<sup>-04</sup></a> | <a href="#">1.25x10<sup>-03</sup></a> |
| <a href="#">1510</a> | <a href="#">LINC02338</a>  | <a href="#">2.191830083</a> | <a href="#">2.97x10<sup>-04</sup></a> | <a href="#">1.28x10<sup>-03</sup></a> |
| <a href="#">1511</a> | <a href="#">AC092447.5</a> | <a href="#">2.415852533</a> | <a href="#">3.00x10<sup>-04</sup></a> | <a href="#">1.29x10<sup>-03</sup></a> |
| <a href="#">1512</a> | <a href="#">AL356364.1</a> | <a href="#">2.002837397</a> | <a href="#">3.02x10<sup>-04</sup></a> | <a href="#">1.30x10<sup>-03</sup></a> |
| <a href="#">1513</a> | <a href="#">LINC02278</a>  | <a href="#">2.566134462</a> | <a href="#">3.02x10<sup>-04</sup></a> | <a href="#">1.30x10<sup>-03</sup></a> |
| <a href="#">1514</a> | <a href="#">LINC01740</a>  | <a href="#">3.320580532</a> | <a href="#">3.08x10<sup>-04</sup></a> | <a href="#">1.32x10<sup>-03</sup></a> |
| <a href="#">1515</a> | <a href="#">AC115676.1</a> | <a href="#">2.644350581</a> | <a href="#">3.15x10<sup>-04</sup></a> | <a href="#">1.35x10<sup>-03</sup></a> |
| <a href="#">1516</a> | <a href="#">AC010331.1</a> | <a href="#">2.092553667</a> | <a href="#">3.18x10<sup>-04</sup></a> | <a href="#">1.36x10<sup>-03</sup></a> |
| <a href="#">1517</a> | <a href="#">AC022239.3</a> | <a href="#">2.008975073</a> | <a href="#">3.18x10<sup>-04</sup></a> | <a href="#">1.36x10<sup>-03</sup></a> |
| <a href="#">1518</a> | <a href="#">AL132712.2</a> | <a href="#">2.026173805</a> | <a href="#">3.19x10<sup>-04</sup></a> | <a href="#">1.36x10<sup>-03</sup></a> |
| <a href="#">1519</a> | <a href="#">AC026790.1</a> | <a href="#">2.291455429</a> | <a href="#">3.22x10<sup>-04</sup></a> | <a href="#">1.38x10<sup>-03</sup></a> |
| <a href="#">1520</a> | <a href="#">AP000688.2</a> | <a href="#">3.166218991</a> | <a href="#">3.25x10<sup>-04</sup></a> | <a href="#">1.39x10<sup>-03</sup></a> |
| <a href="#">1521</a> | <a href="#">AC073115.2</a> | <a href="#">2.50579186</a>  | <a href="#">3.37x10<sup>-04</sup></a> | <a href="#">1.43x10<sup>-03</sup></a> |
| <a href="#">1522</a> | <a href="#">AL022323.3</a> | <a href="#">2.190918636</a> | <a href="#">3.40x10<sup>-04</sup></a> | <a href="#">1.44x10<sup>-03</sup></a> |
| <a href="#">1523</a> | <a href="#">AC010491.1</a> | <a href="#">2.059563517</a> | <a href="#">3.46x10<sup>-04</sup></a> | <a href="#">1.47x10<sup>-03</sup></a> |
| <a href="#">1524</a> | <a href="#">AL391863.1</a> | <a href="#">2.241739272</a> | <a href="#">3.48x10<sup>-04</sup></a> | <a href="#">1.47x10<sup>-03</sup></a> |
| <a href="#">1525</a> | <a href="#">AC122710.2</a> | <a href="#">2.05390626</a>  | <a href="#">3.52x10<sup>-04</sup></a> | <a href="#">1.49x10<sup>-03</sup></a> |
| <a href="#">1526</a> | <a href="#">AP001059.2</a> | <a href="#">2.111237704</a> | <a href="#">3.55x10<sup>-04</sup></a> | <a href="#">1.50x10<sup>-03</sup></a> |
| <a href="#">1527</a> | <a href="#">LINC00511</a>  | <a href="#">3.16211498</a>  | <a href="#">3.57x10<sup>-04</sup></a> | <a href="#">1.50x10<sup>-03</sup></a> |
| <a href="#">1528</a> | <a href="#">AC022182.1</a> | <a href="#">2.19548077</a>  | <a href="#">3.59x10<sup>-04</sup></a> | <a href="#">1.51x10<sup>-03</sup></a> |
| <a href="#">1529</a> | <a href="#">AC104063.1</a> | <a href="#">2.065393491</a> | <a href="#">3.64x10<sup>-04</sup></a> | <a href="#">1.53x10<sup>-03</sup></a> |
| <a href="#">1530</a> | <a href="#">LINC02188</a>  | <a href="#">2.88204712</a>  | <a href="#">3.68x10<sup>-04</sup></a> | <a href="#">1.55x10<sup>-03</sup></a> |
| <a href="#">1531</a> | <a href="#">SLC2A1-AS1</a> | <a href="#">2.386801624</a> | <a href="#">3.69x10<sup>-04</sup></a> | <a href="#">1.55x10<sup>-03</sup></a> |
| <a href="#">1532</a> | <a href="#">DUXAP8</a>     | <a href="#">2.760946132</a> | <a href="#">3.72x10<sup>-04</sup></a> | <a href="#">1.56x10<sup>-03</sup></a> |
| <a href="#">1533</a> | <a href="#">AC090116.1</a> | <a href="#">2.069775575</a> | <a href="#">3.89x10<sup>-04</sup></a> | <a href="#">1.62x10<sup>-03</sup></a> |
| <a href="#">1534</a> | <a href="#">AC091182.2</a> | <a href="#">2.012298264</a> | <a href="#">4.01x10<sup>-04</sup></a> | <a href="#">1.66x10<sup>-03</sup></a> |
| <a href="#">1535</a> | <a href="#">AC120036.5</a> | <a href="#">2.380662947</a> | <a href="#">4.06x10<sup>-04</sup></a> | <a href="#">1.68x10<sup>-03</sup></a> |

|                      |                              |                             |                                       |                                       |
|----------------------|------------------------------|-----------------------------|---------------------------------------|---------------------------------------|
| <a href="#">1536</a> | <a href="#">AL157838.1</a>   | <a href="#">2.517742743</a> | <a href="#">4.11x10<sup>-04</sup></a> | <a href="#">1.70x10<sup>-03</sup></a> |
| <a href="#">1537</a> | <a href="#">AC090696.1</a>   | <a href="#">2.113761953</a> | <a href="#">4.16x10<sup>-04</sup></a> | <a href="#">1.72x10<sup>-03</sup></a> |
| <a href="#">1538</a> | <a href="#">AC012404.1</a>   | <a href="#">2.046689789</a> | <a href="#">4.17x10<sup>-04</sup></a> | <a href="#">1.72x10<sup>-03</sup></a> |
| <a href="#">1539</a> | <a href="#">DPYD-AS1</a>     | <a href="#">2.270032744</a> | <a href="#">4.19x10<sup>-04</sup></a> | <a href="#">1.73x10<sup>-03</sup></a> |
| <a href="#">1540</a> | <a href="#">AC015712.1</a>   | <a href="#">2.093823654</a> | <a href="#">4.24x10<sup>-04</sup></a> | <a href="#">1.74x10<sup>-03</sup></a> |
| <a href="#">1541</a> | <a href="#">LINC01900</a>    | <a href="#">2.306608111</a> | <a href="#">4.41x10<sup>-04</sup></a> | <a href="#">1.81x10<sup>-03</sup></a> |
| <a href="#">1542</a> | <a href="#">LINC01087</a>    | <a href="#">2.625592466</a> | <a href="#">4.59x10<sup>-04</sup></a> | <a href="#">1.87x10<sup>-03</sup></a> |
| <a href="#">1543</a> | <a href="#">AL162584.1</a>   | <a href="#">2.920958867</a> | <a href="#">4.69x10<sup>-04</sup></a> | <a href="#">1.91x10<sup>-03</sup></a> |
| <a href="#">1544</a> | <a href="#">FP671120.3</a>   | <a href="#">2.96814039</a>  | <a href="#">4.70x10<sup>-04</sup></a> | <a href="#">1.91x10<sup>-03</sup></a> |
| <a href="#">1545</a> | <a href="#">AL353746.1</a>   | <a href="#">2.467196528</a> | <a href="#">4.71x10<sup>-04</sup></a> | <a href="#">1.92x10<sup>-03</sup></a> |
| <a href="#">1546</a> | <a href="#">AC124283.1</a>   | <a href="#">2.440030414</a> | <a href="#">4.79x10<sup>-04</sup></a> | <a href="#">1.95x10<sup>-03</sup></a> |
| <a href="#">1547</a> | <a href="#">AL161431.1</a>   | <a href="#">3.378108174</a> | <a href="#">4.81x10<sup>-04</sup></a> | <a href="#">1.95x10<sup>-03</sup></a> |
| <a href="#">1548</a> | <a href="#">AL512622.1</a>   | <a href="#">2.082858749</a> | <a href="#">4.85x10<sup>-04</sup></a> | <a href="#">1.97x10<sup>-03</sup></a> |
| <a href="#">1549</a> | <a href="#">AL121906.1</a>   | <a href="#">2.089620102</a> | <a href="#">4.92x10<sup>-04</sup></a> | <a href="#">1.99x10<sup>-03</sup></a> |
| <a href="#">1550</a> | <a href="#">LINC01221</a>    | <a href="#">2.056951783</a> | <a href="#">5.00x10<sup>-04</sup></a> | <a href="#">2.02x10<sup>-03</sup></a> |
| <a href="#">1551</a> | <a href="#">AL033527.2</a>   | <a href="#">2.158941339</a> | <a href="#">5.00x10<sup>-04</sup></a> | <a href="#">2.02x10<sup>-03</sup></a> |
| <a href="#">1552</a> | <a href="#">FOXCUT</a>       | <a href="#">2.460508147</a> | <a href="#">5.01x10<sup>-04</sup></a> | <a href="#">2.02x10<sup>-03</sup></a> |
| <a href="#">1553</a> | <a href="#">AC074286.1</a>   | <a href="#">2.216483352</a> | <a href="#">5.02x10<sup>-04</sup></a> | <a href="#">2.02x10<sup>-03</sup></a> |
| <a href="#">1554</a> | <a href="#">SOX21-AS1</a>    | <a href="#">2.292973808</a> | <a href="#">5.03x10<sup>-04</sup></a> | <a href="#">2.03x10<sup>-03</sup></a> |
| <a href="#">1555</a> | <a href="#">AC004672.1</a>   | <a href="#">2.064072516</a> | <a href="#">5.10x10<sup>-04</sup></a> | <a href="#">2.05x10<sup>-03</sup></a> |
| <a href="#">1556</a> | <a href="#">AC006329.1</a>   | <a href="#">2.570063316</a> | <a href="#">5.13x10<sup>-04</sup></a> | <a href="#">2.06x10<sup>-03</sup></a> |
| <a href="#">1557</a> | <a href="#">AL035401.1</a>   | <a href="#">2.771058728</a> | <a href="#">5.23x10<sup>-04</sup></a> | <a href="#">2.09x10<sup>-03</sup></a> |
| <a href="#">1558</a> | <a href="#">SMILR</a>        | <a href="#">2.880637835</a> | <a href="#">5.24x10<sup>-04</sup></a> | <a href="#">2.09x10<sup>-03</sup></a> |
| <a href="#">1559</a> | <a href="#">AL157788.1</a>   | <a href="#">2.168486944</a> | <a href="#">5.25x10<sup>-04</sup></a> | <a href="#">2.10x10<sup>-03</sup></a> |
| <a href="#">1560</a> | <a href="#">AL117190.1</a>   | <a href="#">2.576009162</a> | <a href="#">5.29x10<sup>-04</sup></a> | <a href="#">2.11x10<sup>-03</sup></a> |
| <a href="#">1561</a> | <a href="#">C10orf71-AS1</a> | <a href="#">2.727304006</a> | <a href="#">5.49x10<sup>-04</sup></a> | <a href="#">2.18x10<sup>-03</sup></a> |
| <a href="#">1562</a> | <a href="#">AC133644.2</a>   | <a href="#">2.106500596</a> | <a href="#">5.57x10<sup>-04</sup></a> | <a href="#">2.21x10<sup>-03</sup></a> |
| <a href="#">1563</a> | <a href="#">AC008063.1</a>   | <a href="#">2.325997412</a> | <a href="#">5.63x10<sup>-04</sup></a> | <a href="#">2.23x10<sup>-03</sup></a> |



|                      |                             |                             |                                       |                                       |
|----------------------|-----------------------------|-----------------------------|---------------------------------------|---------------------------------------|
| <a href="#">1564</a> | <a href="#">SLC7A11-AS1</a> | <a href="#">2.282993332</a> | <a href="#">5.65x10<sup>-04</sup></a> | <a href="#">2.23x10<sup>-03</sup></a> |
| <a href="#">1565</a> | <a href="#">AC007204.1</a>  | <a href="#">2.284559217</a> | <a href="#">5.70x10<sup>-04</sup></a> | <a href="#">2.25x10<sup>-03</sup></a> |
| <a href="#">1566</a> | <a href="#">AL109613.1</a>  | <a href="#">2.089237892</a> | <a href="#">5.70x10<sup>-04</sup></a> | <a href="#">2.25x10<sup>-03</sup></a> |
| <a href="#">1567</a> | <a href="#">AC022075.2</a>  | <a href="#">2.091622782</a> | <a href="#">5.87x10<sup>-04</sup></a> | <a href="#">2.31x10<sup>-03</sup></a> |
| <a href="#">1568</a> | <a href="#">AC037487.2</a>  | <a href="#">2.81791486</a>  | <a href="#">5.88x10<sup>-04</sup></a> | <a href="#">2.31x10<sup>-03</sup></a> |
| <a href="#">1569</a> | <a href="#">AL512488.1</a>  | <a href="#">2.407866542</a> | <a href="#">5.92x10<sup>-04</sup></a> | <a href="#">2.32x10<sup>-03</sup></a> |
| <a href="#">1570</a> | <a href="#">LINC01342</a>   | <a href="#">2.346916027</a> | <a href="#">5.93x10<sup>-04</sup></a> | <a href="#">2.33x10<sup>-03</sup></a> |
| <a href="#">1571</a> | <a href="#">LINC01426</a>   | <a href="#">2.49382132</a>  | <a href="#">5.97x10<sup>-04</sup></a> | <a href="#">2.34x10<sup>-03</sup></a> |
| <a href="#">1572</a> | <a href="#">AC079296.1</a>  | <a href="#">2.022763321</a> | <a href="#">6.00x10<sup>-04</sup></a> | <a href="#">2.35x10<sup>-03</sup></a> |
| <a href="#">1573</a> | <a href="#">ST8SIA6-AS1</a> | <a href="#">3.135427276</a> | <a href="#">6.03x10<sup>-04</sup></a> | <a href="#">2.36x10<sup>-03</sup></a> |
| <a href="#">1574</a> | <a href="#">LINC01133</a>   | <a href="#">2.942439931</a> | <a href="#">6.07x10<sup>-04</sup></a> | <a href="#">2.37x10<sup>-03</sup></a> |
| <a href="#">1575</a> | <a href="#">AL355303.2</a>  | <a href="#">2.190904134</a> | <a href="#">6.17x10<sup>-04</sup></a> | <a href="#">2.41x10<sup>-03</sup></a> |
| <a href="#">1576</a> | <a href="#">LINC01634</a>   | <a href="#">2.424807689</a> | <a href="#">6.41x10<sup>-04</sup></a> | <a href="#">2.49x10<sup>-03</sup></a> |
| <a href="#">1577</a> | <a href="#">MACC1-AS1</a>   | <a href="#">2.119282811</a> | <a href="#">6.44x10<sup>-04</sup></a> | <a href="#">2.49x10<sup>-03</sup></a> |
| <a href="#">1578</a> | <a href="#">Clorf147</a>    | <a href="#">2.055568112</a> | <a href="#">6.47x10<sup>-04</sup></a> | <a href="#">2.50x10<sup>-03</sup></a> |
| <a href="#">1579</a> | <a href="#">AC092198.1</a>  | <a href="#">2.291795483</a> | <a href="#">6.63x10<sup>-04</sup></a> | <a href="#">2.56x10<sup>-03</sup></a> |
| <a href="#">1580</a> | <a href="#">AC084048.1</a>  | <a href="#">2.22481271</a>  | <a href="#">6.78x10<sup>-04</sup></a> | <a href="#">2.61x10<sup>-03</sup></a> |
| <a href="#">1581</a> | <a href="#">AC017048.3</a>  | <a href="#">2.590032262</a> | <a href="#">6.84x10<sup>-04</sup></a> | <a href="#">2.63x10<sup>-03</sup></a> |
| <a href="#">1582</a> | <a href="#">AL391152.1</a>  | <a href="#">2.253698297</a> | <a href="#">6.83x10<sup>-04</sup></a> | <a href="#">2.63x10<sup>-03</sup></a> |
| <a href="#">1583</a> | <a href="#">AC084125.2</a>  | <a href="#">2.178632426</a> | <a href="#">7.29x10<sup>-04</sup></a> | <a href="#">2.78x10<sup>-03</sup></a> |
| <a href="#">1584</a> | <a href="#">LINC01224</a>   | <a href="#">2.664110996</a> | <a href="#">7.38x10<sup>-04</sup></a> | <a href="#">2.81x10<sup>-03</sup></a> |
| <a href="#">1585</a> | <a href="#">AC073651.1</a>  | <a href="#">2.827285339</a> | <a href="#">7.43x10<sup>-04</sup></a> | <a href="#">2.82x10<sup>-03</sup></a> |
| <a href="#">1586</a> | <a href="#">LINC01116</a>   | <a href="#">2.495276406</a> | <a href="#">7.52x10<sup>-04</sup></a> | <a href="#">2.85x10<sup>-03</sup></a> |
| <a href="#">1587</a> | <a href="#">AC005828.1</a>  | <a href="#">2.153190678</a> | <a href="#">7.70x10<sup>-04</sup></a> | <a href="#">2.91x10<sup>-03</sup></a> |
| <a href="#">1588</a> | <a href="#">AC023194.3</a>  | <a href="#">2.018725085</a> | <a href="#">7.71x10<sup>-04</sup></a> | <a href="#">2.91x10<sup>-03</sup></a> |
| <a href="#">1589</a> | <a href="#">AL161781.2</a>  | <a href="#">2.382296405</a> | <a href="#">7.72x10<sup>-04</sup></a> | <a href="#">2.92x10<sup>-03</sup></a> |
| <a href="#">1590</a> | <a href="#">AL109923.1</a>  | <a href="#">2.106135511</a> | <a href="#">7.89x10<sup>-04</sup></a> | <a href="#">2.98x10<sup>-03</sup></a> |
| <a href="#">1591</a> | <a href="#">AC090568.2</a>  | <a href="#">2.135166436</a> | <a href="#">8.00x10<sup>-04</sup></a> | <a href="#">3.01x10<sup>-03</sup></a> |

|                      |                            |                             |                                       |                                       |
|----------------------|----------------------------|-----------------------------|---------------------------------------|---------------------------------------|
| <a href="#">1592</a> | <a href="#">AC127164.1</a> | <a href="#">2.135138305</a> | <a href="#">8.10x10<sup>-04</sup></a> | <a href="#">3.05x10<sup>-03</sup></a> |
| <a href="#">1593</a> | <a href="#">AC131182.1</a> | <a href="#">2.791538696</a> | <a href="#">8.11x10<sup>-04</sup></a> | <a href="#">3.05x10<sup>-03</sup></a> |
| <a href="#">1594</a> | <a href="#">AL358334.2</a> | <a href="#">2.041401019</a> | <a href="#">8.14x10<sup>-04</sup></a> | <a href="#">3.06x10<sup>-03</sup></a> |
| <a href="#">1595</a> | <a href="#">AC097347.1</a> | <a href="#">2.112865653</a> | <a href="#">8.22x10<sup>-04</sup></a> | <a href="#">3.09x10<sup>-03</sup></a> |
| <a href="#">1596</a> | <a href="#">AL137793.1</a> | <a href="#">2.107377923</a> | <a href="#">8.27x10<sup>-04</sup></a> | <a href="#">3.10x10<sup>-03</sup></a> |
| <a href="#">1597</a> | <a href="#">AC145350.2</a> | <a href="#">2.098018573</a> | <a href="#">8.45x10<sup>-04</sup></a> | <a href="#">3.16x10<sup>-03</sup></a> |
| <a href="#">1598</a> | <a href="#">FLJ42969</a>   | <a href="#">2.057496218</a> | <a href="#">8.54x10<sup>-04</sup></a> | <a href="#">3.19x10<sup>-03</sup></a> |
| <a href="#">1599</a> | <a href="#">PP14571</a>    | <a href="#">2.374758</a>    | <a href="#">8.62x10<sup>-04</sup></a> | <a href="#">3.22x10<sup>-03</sup></a> |
| <a href="#">1600</a> | <a href="#">LINC01713</a>  | <a href="#">2.225610666</a> | <a href="#">8.80x10<sup>-04</sup></a> | <a href="#">3.28x10<sup>-03</sup></a> |
| <a href="#">1601</a> | <a href="#">AL390719.2</a> | <a href="#">2.09189449</a>  | <a href="#">8.80x10<sup>-04</sup></a> | <a href="#">3.28x10<sup>-03</sup></a> |
| <a href="#">1602</a> | <a href="#">WDFY3-AS1</a>  | <a href="#">2.586411405</a> | <a href="#">8.86x10<sup>-04</sup></a> | <a href="#">3.29x10<sup>-03</sup></a> |
| <a href="#">1603</a> | <a href="#">AC093903.1</a> | <a href="#">3.041822387</a> | <a href="#">8.91x10<sup>-04</sup></a> | <a href="#">3.31x10<sup>-03</sup></a> |
| <a href="#">1604</a> | <a href="#">AC130895.1</a> | <a href="#">2.832621935</a> | <a href="#">8.99x10<sup>-04</sup></a> | <a href="#">3.33x10<sup>-03</sup></a> |
| <a href="#">1605</a> | <a href="#">AL442647.1</a> | <a href="#">2.440549353</a> | <a href="#">9.47x10<sup>-04</sup></a> | <a href="#">3.49x10<sup>-03</sup></a> |
| <a href="#">1606</a> | <a href="#">AC011456.1</a> | <a href="#">2.284319958</a> | <a href="#">9.78x10<sup>-04</sup></a> | <a href="#">3.59x10<sup>-03</sup></a> |
| <a href="#">1607</a> | <a href="#">AC130371.1</a> | <a href="#">2.137655702</a> | <a href="#">9.87x10<sup>-04</sup></a> | <a href="#">3.62x10<sup>-03</sup></a> |
| <a href="#">1608</a> | <a href="#">LINC01882</a>  | <a href="#">2.35627497</a>  | <a href="#">9.88x10<sup>-04</sup></a> | <a href="#">3.62x10<sup>-03</sup></a> |
| <a href="#">1609</a> | <a href="#">AC016027.2</a> | <a href="#">2.126063285</a> | <a href="#">1.02x10<sup>-03</sup></a> | <a href="#">3.74x10<sup>-03</sup></a> |
| <a href="#">1610</a> | <a href="#">AC015909.3</a> | <a href="#">2.414379233</a> | <a href="#">1.03x10<sup>-03</sup></a> | <a href="#">3.76x10<sup>-03</sup></a> |
| <a href="#">1611</a> | <a href="#">AC107882.1</a> | <a href="#">2.435037468</a> | <a href="#">1.03x10<sup>-03</sup></a> | <a href="#">3.77x10<sup>-03</sup></a> |
| <a href="#">1612</a> | <a href="#">RBAKDN</a>     | <a href="#">2.32085955</a>  | <a href="#">1.05x10<sup>-03</sup></a> | <a href="#">3.82x10<sup>-03</sup></a> |
| <a href="#">1613</a> | <a href="#">AC104982.2</a> | <a href="#">2.563017704</a> | <a href="#">1.06x10<sup>-03</sup></a> | <a href="#">3.85x10<sup>-03</sup></a> |
| <a href="#">1614</a> | <a href="#">PCAT5</a>      | <a href="#">2.129422689</a> | <a href="#">1.10x10<sup>-03</sup></a> | <a href="#">3.99x10<sup>-03</sup></a> |
| <a href="#">1615</a> | <a href="#">AL365356.1</a> | <a href="#">2.310699202</a> | <a href="#">1.18x10<sup>-03</sup></a> | <a href="#">4.22x10<sup>-03</sup></a> |
| <a href="#">1616</a> | <a href="#">LINC00513</a>  | <a href="#">2.2772316</a>   | <a href="#">1.23x10<sup>-03</sup></a> | <a href="#">4.37x10<sup>-03</sup></a> |
| <a href="#">1617</a> | <a href="#">AC006141.1</a> | <a href="#">2.291111038</a> | <a href="#">1.24x10<sup>-03</sup></a> | <a href="#">4.41x10<sup>-03</sup></a> |
| <a href="#">1618</a> | <a href="#">AL031668.1</a> | <a href="#">2.262624964</a> | <a href="#">1.26x10<sup>-03</sup></a> | <a href="#">4.48x10<sup>-03</sup></a> |
| <a href="#">1619</a> | <a href="#">LINC01090</a>  | <a href="#">2.024114563</a> | <a href="#">1.32x10<sup>-03</sup></a> | <a href="#">4.68x10<sup>-03</sup></a> |

|                      |                            |                             |                                       |                                       |
|----------------------|----------------------------|-----------------------------|---------------------------------------|---------------------------------------|
| <a href="#">1620</a> | <a href="#">LINC00184</a>  | <a href="#">2.013843501</a> | <a href="#">1.34x10<sup>-03</sup></a> | <a href="#">4.74x10<sup>-03</sup></a> |
| <a href="#">1621</a> | <a href="#">AP001442.1</a> | <a href="#">2.333300242</a> | <a href="#">1.35x10<sup>-03</sup></a> | <a href="#">4.77x10<sup>-03</sup></a> |
| <a href="#">1622</a> | <a href="#">AC017067.1</a> | <a href="#">2.236217562</a> | <a href="#">1.37x10<sup>-03</sup></a> | <a href="#">4.82x10<sup>-03</sup></a> |
| <a href="#">1623</a> | <a href="#">AL358216.1</a> | <a href="#">2.270257043</a> | <a href="#">1.39x10<sup>-03</sup></a> | <a href="#">4.86x10<sup>-03</sup></a> |
| <a href="#">1624</a> | <a href="#">AC093802.1</a> | <a href="#">2.028057411</a> | <a href="#">1.39x10<sup>-03</sup></a> | <a href="#">4.88x10<sup>-03</sup></a> |
| <a href="#">1625</a> | <a href="#">AC019171.1</a> | <a href="#">2.312028312</a> | <a href="#">1.43x10<sup>-03</sup></a> | <a href="#">4.99x10<sup>-03</sup></a> |
| <a href="#">1626</a> | <a href="#">AC068643.1</a> | <a href="#">2.448573733</a> | <a href="#">1.51x10<sup>-03</sup></a> | <a href="#">5.24x10<sup>-03</sup></a> |
| <a href="#">1627</a> | <a href="#">AC104984.6</a> | <a href="#">2.441075738</a> | <a href="#">1.54x10<sup>-03</sup></a> | <a href="#">5.33x10<sup>-03</sup></a> |
| <a href="#">1628</a> | <a href="#">LINC01697</a>  | <a href="#">2.546560514</a> | <a href="#">1.56x10<sup>-03</sup></a> | <a href="#">5.38x10<sup>-03</sup></a> |
| <a href="#">1629</a> | <a href="#">AP003696.1</a> | <a href="#">2.366390968</a> | <a href="#">1.57x10<sup>-03</sup></a> | <a href="#">5.42x10<sup>-03</sup></a> |
| <a href="#">1630</a> | <a href="#">DLGAP1-AS5</a> | <a href="#">2.075984696</a> | <a href="#">1.64x10<sup>-03</sup></a> | <a href="#">5.63x10<sup>-03</sup></a> |
| <a href="#">1631</a> | <a href="#">AP001803.2</a> | <a href="#">2.784903781</a> | <a href="#">1.64x10<sup>-03</sup></a> | <a href="#">5.64x10<sup>-03</sup></a> |
| <a href="#">1632</a> | <a href="#">AC099811.1</a> | <a href="#">2.075684526</a> | <a href="#">1.64x10<sup>-03</sup></a> | <a href="#">5.64x10<sup>-03</sup></a> |
| <a href="#">1633</a> | <a href="#">LINC01317</a>  | <a href="#">2.473911939</a> | <a href="#">1.76x10<sup>-03</sup></a> | <a href="#">6.00x10<sup>-03</sup></a> |
| <a href="#">1634</a> | <a href="#">AL136987.1</a> | <a href="#">2.248972082</a> | <a href="#">1.77x10<sup>-03</sup></a> | <a href="#">6.02x10<sup>-03</sup></a> |
| <a href="#">1635</a> | <a href="#">AP001046.1</a> | <a href="#">2.019217024</a> | <a href="#">1.80x10<sup>-03</sup></a> | <a href="#">6.12x10<sup>-03</sup></a> |
| <a href="#">1636</a> | <a href="#">AL589863.1</a> | <a href="#">2.425920147</a> | <a href="#">1.87x10<sup>-03</sup></a> | <a href="#">6.33x10<sup>-03</sup></a> |
| <a href="#">1637</a> | <a href="#">LINC01535</a>  | <a href="#">2.040299612</a> | <a href="#">1.89x10<sup>-03</sup></a> | <a href="#">6.39x10<sup>-03</sup></a> |
| <a href="#">1638</a> | <a href="#">AC025154.2</a> | <a href="#">2.45965806</a>  | <a href="#">2.08x10<sup>-03</sup></a> | <a href="#">6.91x10<sup>-03</sup></a> |
| <a href="#">1639</a> | <a href="#">MAGI1-AS1</a>  | <a href="#">2.468460148</a> | <a href="#">2.14x10<sup>-03</sup></a> | <a href="#">7.10x10<sup>-03</sup></a> |
| <a href="#">1640</a> | <a href="#">AP000439.2</a> | <a href="#">2.575274152</a> | <a href="#">2.18x10<sup>-03</sup></a> | <a href="#">7.22x10<sup>-03</sup></a> |
| <a href="#">1641</a> | <a href="#">AL391095.2</a> | <a href="#">2.790947017</a> | <a href="#">2.20x10<sup>-03</sup></a> | <a href="#">7.29x10<sup>-03</sup></a> |
| <a href="#">1642</a> | <a href="#">LINC01659</a>  | <a href="#">2.039049498</a> | <a href="#">2.21x10<sup>-03</sup></a> | <a href="#">7.31x10<sup>-03</sup></a> |
| <a href="#">1643</a> | <a href="#">AC006305.1</a> | <a href="#">2.024789692</a> | <a href="#">2.29x10<sup>-03</sup></a> | <a href="#">7.52x10<sup>-03</sup></a> |
| <a href="#">1644</a> | <a href="#">C5orf17</a>    | <a href="#">2.50554101</a>  | <a href="#">2.29x10<sup>-03</sup></a> | <a href="#">7.55x10<sup>-03</sup></a> |
| <a href="#">1645</a> | <a href="#">PRRT3-AS1</a>  | <a href="#">2.033113361</a> | <a href="#">2.41x10<sup>-03</sup></a> | <a href="#">7.86x10<sup>-03</sup></a> |
| <a href="#">1646</a> | <a href="#">LINC02228</a>  | <a href="#">2.46088406</a>  | <a href="#">2.41x10<sup>-03</sup></a> | <a href="#">7.86x10<sup>-03</sup></a> |
| <a href="#">1647</a> | <a href="#">AC002558.3</a> | <a href="#">2.042946875</a> | <a href="#">2.55x10<sup>-03</sup></a> | <a href="#">8.26x10<sup>-03</sup></a> |

|                      |                                   |                             |                                       |                                       |
|----------------------|-----------------------------------|-----------------------------|---------------------------------------|---------------------------------------|
| <a href="#">1648</a> | <a href="#">AC090164.2</a>        | <a href="#">2.049428104</a> | <a href="#">2.56x10<sup>-03</sup></a> | <a href="#">8.30x10<sup>-03</sup></a> |
| <a href="#">1649</a> | <a href="#">MIR205HG</a>          | <a href="#">2.153818304</a> | <a href="#">2.57x10<sup>-03</sup></a> | <a href="#">8.31x10<sup>-03</sup></a> |
| <a href="#">1650</a> | <a href="#">AC096711.3</a>        | <a href="#">2.000920405</a> | <a href="#">2.80x10<sup>-03</sup></a> | <a href="#">8.98x10<sup>-03</sup></a> |
| <a href="#">1651</a> | <a href="#">MIR670HG</a>          | <a href="#">2.039561427</a> | <a href="#">2.81x10<sup>-03</sup></a> | <a href="#">8.99x10<sup>-03</sup></a> |
| <a href="#">1652</a> | <a href="#">ANKRD62P1-PARP4P3</a> | <a href="#">2.416154863</a> | <a href="#">2.85x10<sup>-03</sup></a> | <a href="#">9.10x10<sup>-03</sup></a> |
| <a href="#">1653</a> | <a href="#">AC011840.1</a>        | <a href="#">2.428846192</a> | <a href="#">2.88x10<sup>-03</sup></a> | <a href="#">9.18x10<sup>-03</sup></a> |
| <a href="#">1654</a> | <a href="#">AC106873.1</a>        | <a href="#">2.139033865</a> | <a href="#">2.90x10<sup>-03</sup></a> | <a href="#">9.22x10<sup>-03</sup></a> |
| <a href="#">1655</a> | <a href="#">AL356805.1</a>        | <a href="#">2.490096817</a> | <a href="#">2.95x10<sup>-03</sup></a> | <a href="#">9.39x10<sup>-03</sup></a> |
| <a href="#">1656</a> | <a href="#">AC012123.1</a>        | <a href="#">2.380612447</a> | <a href="#">2.99x10<sup>-03</sup></a> | <a href="#">9.49x10<sup>-03</sup></a> |
| <a href="#">1657</a> | <a href="#">AC008760.2</a>        | <a href="#">2.290569035</a> | <a href="#">3.10x10<sup>-03</sup></a> | <a href="#">9.78x10<sup>-03</sup></a> |
| <a href="#">1658</a> | <a href="#">AC007533.1</a>        | <a href="#">2.201875372</a> | <a href="#">3.32x10<sup>-03</sup></a> | <a href="#">1.04x10<sup>-02</sup></a> |
| <a href="#">1659</a> | <a href="#">LINC00665</a>         | <a href="#">2.439292533</a> | <a href="#">3.36x10<sup>-03</sup></a> | <a href="#">1.05x10<sup>-02</sup></a> |
| <a href="#">1660</a> | <a href="#">AC074135.1</a>        | <a href="#">2.046991724</a> | <a href="#">3.47x10<sup>-03</sup></a> | <a href="#">1.08x10<sup>-02</sup></a> |
| <a href="#">1661</a> | <a href="#">AL110292.1</a>        | <a href="#">2.307403748</a> | <a href="#">3.67x10<sup>-03</sup></a> | <a href="#">1.13x10<sup>-02</sup></a> |
| <a href="#">1662</a> | <a href="#">AL450344.2</a>        | <a href="#">2.238941231</a> | <a href="#">3.84x10<sup>-03</sup></a> | <a href="#">1.18x10<sup>-02</sup></a> |
| <a href="#">1663</a> | <a href="#">AL022323.2</a>        | <a href="#">2.180641646</a> | <a href="#">3.96x10<sup>-03</sup></a> | <a href="#">1.21x10<sup>-02</sup></a> |
| <a href="#">1664</a> | <a href="#">KC6</a>               | <a href="#">2.258906553</a> | <a href="#">4.00x10<sup>-03</sup></a> | <a href="#">1.22x10<sup>-02</sup></a> |
| <a href="#">1665</a> | <a href="#">AC110792.3</a>        | <a href="#">2.197430069</a> | <a href="#">4.00x10<sup>-03</sup></a> | <a href="#">1.23x10<sup>-02</sup></a> |
| <a href="#">1666</a> | <a href="#">SMAD1-AS2</a>         | <a href="#">2.206258543</a> | <a href="#">4.03x10<sup>-03</sup></a> | <a href="#">1.23x10<sup>-02</sup></a> |
| <a href="#">1667</a> | <a href="#">AC023034.2</a>        | <a href="#">2.062249183</a> | <a href="#">4.38x10<sup>-03</sup></a> | <a href="#">1.32x10<sup>-02</sup></a> |
| <a href="#">1668</a> | <a href="#">AC131902.1</a>        | <a href="#">2.161370843</a> | <a href="#">4.41x10<sup>-03</sup></a> | <a href="#">1.33x10<sup>-02</sup></a> |
| <a href="#">1669</a> | <a href="#">AC100801.1</a>        | <a href="#">2.28225925</a>  | <a href="#">4.43x10<sup>-03</sup></a> | <a href="#">1.33x10<sup>-02</sup></a> |
| <a href="#">1670</a> | <a href="#">AL691482.3</a>        | <a href="#">2.052713425</a> | <a href="#">5.20x10<sup>-03</sup></a> | <a href="#">1.53x10<sup>-02</sup></a> |
| <a href="#">1671</a> | <a href="#">AC087482.1</a>        | <a href="#">2.155575267</a> | <a href="#">5.32x10<sup>-03</sup></a> | <a href="#">1.55x10<sup>-02</sup></a> |
| <a href="#">1672</a> | <a href="#">FAM30A</a>            | <a href="#">2.146336764</a> | <a href="#">5.37x10<sup>-03</sup></a> | <a href="#">1.57x10<sup>-02</sup></a> |
| <a href="#">1673</a> | <a href="#">Z93022.1</a>          | <a href="#">2.058009165</a> | <a href="#">5.45x10<sup>-03</sup></a> | <a href="#">1.58x10<sup>-02</sup></a> |
| <a href="#">1674</a> | <a href="#">AC011939.2</a>        | <a href="#">2.221684905</a> | <a href="#">5.62x10<sup>-03</sup></a> | <a href="#">1.63x10<sup>-02</sup></a> |
| <a href="#">1675</a> | <a href="#">AC138058.1</a>        | <a href="#">2.120503908</a> | <a href="#">5.80x10<sup>-03</sup></a> | <a href="#">1.68x10<sup>-02</sup></a> |

|                      |                              |                             |                                       |                                       |
|----------------------|------------------------------|-----------------------------|---------------------------------------|---------------------------------------|
| <a href="#">1676</a> | <a href="#">AL356756.1</a>   | <a href="#">2.029982462</a> | <a href="#">6.17x10<sup>-03</sup></a> | <a href="#">1.77x10<sup>-02</sup></a> |
| <a href="#">1677</a> | <a href="#">ARHGAP26-IT1</a> | <a href="#">2.045120978</a> | <a href="#">6.21x10<sup>-03</sup></a> | <a href="#">1.77x10<sup>-02</sup></a> |
| <a href="#">1678</a> | <a href="#">AC087380.1</a>   | <a href="#">2.087394092</a> | <a href="#">6.92x10<sup>-03</sup></a> | <a href="#">1.95x10<sup>-02</sup></a> |
| <a href="#">1679</a> | <a href="#">AC009365.2</a>   | <a href="#">2.214381917</a> | <a href="#">7.17x10<sup>-03</sup></a> | <a href="#">2.01x10<sup>-02</sup></a> |
| <a href="#">1680</a> | <a href="#">AP005131.4</a>   | <a href="#">2.072801081</a> | <a href="#">7.63x10<sup>-03</sup></a> | <a href="#">2.12x10<sup>-02</sup></a> |
| <a href="#">1681</a> | <a href="#">AP000851.2</a>   | <a href="#">2.030198866</a> | <a href="#">7.79x10<sup>-03</sup></a> | <a href="#">2.15x10<sup>-02</sup></a> |
| <a href="#">1682</a> | <a href="#">LINC01443</a>    | <a href="#">2.112224853</a> | <a href="#">1.02x10<sup>-02</sup></a> | <a href="#">2.72x10<sup>-02</sup></a> |
| <a href="#">1683</a> | <a href="#">MIR663AHG</a>    | <a href="#">2.063621502</a> | <a href="#">1.03x10<sup>-02</sup></a> | <a href="#">2.75x10<sup>-02</sup></a> |
| <a href="#">1684</a> | <a href="#">MEG3</a>         | <a href="#">2.263104322</a> | <a href="#">1.15x10<sup>-02</sup></a> | <a href="#">3.00x10<sup>-02</sup></a> |

3

4

[lncRNA, long non-coding RNA; FC, fold change; FDR, false discovery rate.](#)

Table SII. Screened raw data of 107 survival-related lncRNAs from TCGA database.

| -         | <u>lncRNA</u>     | <u>HR</u>                   | <u>P-value</u>              |
|-----------|-------------------|-----------------------------|-----------------------------|
| <u>1</u>  | <u>LINC02451</u>  | <u>1.14x10<sup>0</sup></u>  | <u>7.29x10<sup>-5</sup></u> |
| <u>2</u>  | <u>AC092683.2</u> | <u>1.14x10<sup>0</sup></u>  | <u>2.39x10<sup>-4</sup></u> |
| <u>3</u>  | <u>AL627443.1</u> | <u>1.26x10<sup>0</sup></u>  | <u>4.54x10<sup>-4</sup></u> |
| <u>4</u>  | <u>AP005137.2</u> | <u>1.17x10<sup>0</sup></u>  | <u>4.90x10<sup>-4</sup></u> |
| <u>5</u>  | <u>AC131274.1</u> | <u>1.16x10<sup>0</sup></u>  | <u>1.01x10<sup>-3</sup></u> |
| <u>6</u>  | <u>PCAT5</u>      | <u>7.64x10<sup>-1</sup></u> | <u>1.41x10<sup>-3</sup></u> |
| <u>7</u>  | <u>AL139393.1</u> | <u>1.13x10<sup>0</sup></u>  | <u>1.51x10<sup>-3</sup></u> |
| <u>8</u>  | <u>CASC11</u>     | <u>1.12x10<sup>0</sup></u>  | <u>1.79x10<sup>-3</sup></u> |
| <u>9</u>  | <u>CPS1-IT1</u>   | <u>1.16x10<sup>0</sup></u>  | <u>1.83x10<sup>-3</sup></u> |
| <u>10</u> | <u>AL592182.1</u> | <u>1.11x10<sup>0</sup></u>  | <u>2.98x10<sup>-3</sup></u> |
| <u>11</u> | <u>AC007406.2</u> | <u>1.14x10<sup>0</sup></u>  | <u>3.21x10<sup>-3</sup></u> |
| <u>12</u> | <u>PACRG-AS3</u>  | <u>8.38x10<sup>-1</sup></u> | <u>3.68x10<sup>-3</sup></u> |
| <u>13</u> | <u>AC021683.3</u> | <u>8.01x10<sup>-1</sup></u> | <u>4.10x10<sup>-3</sup></u> |
| <u>14</u> | <u>LINC00588</u>  | <u>1.14x10<sup>0</sup></u>  | <u>4.24x10<sup>-3</sup></u> |
| <u>15</u> | <u>AP000439.2</u> | <u>1.12x10<sup>0</sup></u>  | <u>4.41x10<sup>-3</sup></u> |
| <u>16</u> | <u>TLX1NB</u>     | <u>1.12x10<sup>0</sup></u>  | <u>5.11x10<sup>-3</sup></u> |
| <u>17</u> | <u>AC098850.3</u> | <u>1.19x10<sup>0</sup></u>  | <u>5.81x10<sup>-3</sup></u> |
| <u>18</u> | <u>AC036176.3</u> | <u>1.13x10<sup>0</sup></u>  | <u>6.22x10<sup>-3</sup></u> |
| <u>19</u> | <u>LINC01811</u>  | <u>8.14x10<sup>-1</sup></u> | <u>6.78x10<sup>-3</sup></u> |
| <u>20</u> | <u>AC025575.1</u> | <u>1.14x10<sup>0</sup></u>  | <u>7.10x10<sup>-3</sup></u> |
| <u>21</u> | <u>AP000317.2</u> | <u>1.11x10<sup>0</sup></u>  | <u>7.19x10<sup>-3</sup></u> |
| <u>22</u> | <u>AC087379.1</u> | <u>8.77x10<sup>-1</sup></u> | <u>7.25x10<sup>-3</sup></u> |
| <u>23</u> | <u>AL391361.3</u> | <u>1.14x10<sup>0</sup></u>  | <u>7.38x10<sup>-3</sup></u> |
| <u>24</u> | <u>AL596223.1</u> | <u>1.11x10<sup>0</sup></u>  | <u>7.39x10<sup>-3</sup></u> |
| <u>25</u> | <u>AC128709.2</u> | <u>8.21x10<sup>-1</sup></u> | <u>7.97x10<sup>-3</sup></u> |
| <u>26</u> | <u>AC112206.2</u> | <u>9.06x10<sup>-1</sup></u> | <u>8.24x10<sup>-3</sup></u> |
| <u>27</u> | <u>TRERNA1</u>    | <u>1.15x10<sup>0</sup></u>  | <u>9.62x10<sup>-3</sup></u> |
| <u>28</u> | <u>AL117372.1</u> | <u>1.06x10<sup>0</sup></u>  | <u>9.98x10<sup>-3</sup></u> |
| <u>29</u> | <u>CCAT1</u>      | <u>1.07x10<sup>0</sup></u>  | <u>1.01x10<sup>-2</sup></u> |
| <u>30</u> | <u>AL161781.2</u> | <u>8.75x10<sup>-1</sup></u> | <u>1.08x10<sup>-2</sup></u> |
| <u>31</u> | <u>AC004801.5</u> | <u>7.78x10<sup>-1</sup></u> | <u>1.20x10<sup>-2</sup></u> |
| <u>32</u> | <u>AC124804.1</u> | <u>1.07x10<sup>0</sup></u>  | <u>1.22x10<sup>-2</sup></u> |
| <u>33</u> | <u>NTM-IT</u>     | <u>1.20x10<sup>0</sup></u>  | <u>1.27x10<sup>-2</sup></u> |
| <u>34</u> | <u>AL032819.1</u> | <u>8.65x10<sup>-1</sup></u> | <u>1.35x10<sup>-2</sup></u> |
| <u>35</u> | <u>MIR34AHG</u>   | <u>8.87x10<sup>-1</sup></u> | <u>1.44x10<sup>-2</sup></u> |
| <u>36</u> | <u>AC004947.1</u> | <u>8.85x10<sup>-1</sup></u> | <u>1.53x10<sup>-2</sup></u> |
| <u>37</u> | <u>AL354861.2</u> | <u>8.80x10<sup>-1</sup></u> | <u>1.59x10<sup>-2</sup></u> |
| <u>38</u> | <u>AC079921.1</u> | <u>1.10x10<sup>0</sup></u>  | <u>1.64x10<sup>-2</sup></u> |

|           |                   |                             |                             |
|-----------|-------------------|-----------------------------|-----------------------------|
| <u>39</u> | <u>AL592528.1</u> | <u>8.11x10<sup>-1</sup></u> | <u>1.81x10<sup>-2</sup></u> |
| <u>40</u> | <u>AC022960.2</u> | <u>1.10x10<sup>0</sup></u>  | <u>1.85x10<sup>-2</sup></u> |
| <u>41</u> | <u>AC024257.1</u> | <u>8.76x10<sup>-1</sup></u> | <u>1.91x10<sup>-2</sup></u> |
| <u>42</u> | <u>RFPL1S</u>     | <u>9.17x10<sup>-1</sup></u> | <u>1.95x10<sup>-2</sup></u> |
| <u>43</u> | <u>AC092691.1</u> | <u>8.91x10<sup>-1</sup></u> | <u>1.99x10<sup>-2</sup></u> |
| <u>44</u> | <u>AL355483.3</u> | <u>1.15x10<sup>0</sup></u>  | <u>2.00x10<sup>-2</sup></u> |
| <u>45</u> | <u>AC094105.1</u> | <u>1.27x10<sup>0</sup></u>  | <u>2.06x10<sup>-2</sup></u> |
| <u>46</u> | <u>LINC01863</u>  | <u>8.97x10<sup>-1</sup></u> | <u>2.08x10<sup>-2</sup></u> |
| <u>47</u> | <u>AP000439.3</u> | <u>8.66x10<sup>-1</sup></u> | <u>2.18x10<sup>-2</sup></u> |
| <u>48</u> | <u>AC022509.3</u> | <u>1.06x10<sup>0</sup></u>  | <u>2.25x10<sup>-2</sup></u> |
| <u>49</u> | <u>AC108136.1</u> | <u>1.13x10<sup>0</sup></u>  | <u>2.27x10<sup>-2</sup></u> |
| <u>50</u> | <u>AC104823.1</u> | <u>1.16x10<sup>0</sup></u>  | <u>2.29x10<sup>-2</sup></u> |
| <u>51</u> | <u>AL356489.2</u> | <u>9.15x10<sup>-1</sup></u> | <u>2.38x10<sup>-2</sup></u> |
| <u>52</u> | <u>LINC01468</u>  | <u>1.08x10<sup>0</sup></u>  | <u>2.39x10<sup>-2</sup></u> |
| <u>53</u> | <u>AC036101.1</u> | <u>1.14x10<sup>0</sup></u>  | <u>2.41x10<sup>-2</sup></u> |
| <u>54</u> | <u>AL591686.1</u> | <u>8.57x10<sup>-1</sup></u> | <u>2.42x10<sup>-2</sup></u> |
| <u>55</u> | <u>UMODL1-AS1</u> | <u>9.39x10<sup>-1</sup></u> | <u>2.46x10<sup>-2</sup></u> |
| <u>56</u> | <u>LINC01929</u>  | <u>1.07x10<sup>0</sup></u>  | <u>2.49x10<sup>-2</sup></u> |
| <u>57</u> | <u>AC100793.4</u> | <u>8.97x10<sup>-1</sup></u> | <u>2.61x10<sup>-2</sup></u> |
| <u>58</u> | <u>AL031584.2</u> | <u>1.14x10<sup>0</sup></u>  | <u>2.66x10<sup>-2</sup></u> |
| <u>59</u> | <u>NAV2-AS2</u>   | <u>9.00x10<sup>-1</sup></u> | <u>2.68x10<sup>-2</sup></u> |
| <u>60</u> | <u>AL031600.2</u> | <u>8.63x10<sup>-1</sup></u> | <u>2.71x10<sup>-2</sup></u> |
| <u>61</u> | <u>LINC00269</u>  | <u>7.63x10<sup>-1</sup></u> | <u>2.87x10<sup>-2</sup></u> |
| <u>62</u> | <u>AL365181.2</u> | <u>1.06x10<sup>0</sup></u>  | <u>2.88x10<sup>-2</sup></u> |
| <u>63</u> | <u>AL078601.2</u> | <u>9.12x10<sup>-1</sup></u> | <u>2.88x10<sup>-2</sup></u> |
| <u>64</u> | <u>LINC01176</u>  | <u>1.14x10<sup>0</sup></u>  | <u>2.93x10<sup>-2</sup></u> |
| <u>65</u> | <u>AC009505.1</u> | <u>1.12x10<sup>0</sup></u>  | <u>2.96x10<sup>-2</sup></u> |
| <u>66</u> | <u>AL136369.1</u> | <u>8.66x10<sup>-1</sup></u> | <u>3.01x10<sup>-2</sup></u> |
| <u>67</u> | <u>AC105243.1</u> | <u>1.09x10<sup>0</sup></u>  | <u>3.03x10<sup>-2</sup></u> |
| <u>68</u> | <u>LINC02088</u>  | <u>1.09x10<sup>0</sup></u>  | <u>3.04x10<sup>-2</sup></u> |
| <u>69</u> | <u>AC007599.2</u> | <u>1.05x10<sup>0</sup></u>  | <u>3.06x10<sup>-2</sup></u> |
| <u>70</u> | <u>AL390962.1</u> | <u>1.04x10<sup>0</sup></u>  | <u>3.06x10<sup>-2</sup></u> |
| <u>71</u> | <u>AC131902.1</u> | <u>8.87x10<sup>-1</sup></u> | <u>3.13x10<sup>-2</sup></u> |
| <u>72</u> | <u>AC105219.4</u> | <u>1.12x10<sup>0</sup></u>  | <u>3.28x10<sup>-2</sup></u> |
| <u>73</u> | <u>LINC01665</u>  | <u>1.13x10<sup>0</sup></u>  | <u>3.32x10<sup>-2</sup></u> |
| <u>74</u> | <u>AC100848.1</u> | <u>1.09x10<sup>0</sup></u>  | <u>3.46x10<sup>-2</sup></u> |
| <u>75</u> | <u>AL365199.1</u> | <u>8.75x10<sup>-1</sup></u> | <u>3.55x10<sup>-2</sup></u> |
| <u>76</u> | <u>AC048383.1</u> | <u>8.76x10<sup>-1</sup></u> | <u>3.58x10<sup>-2</sup></u> |
| <u>77</u> | <u>AC022733.1</u> | <u>9.47x10<sup>-1</sup></u> | <u>3.59x10<sup>-2</sup></u> |
| <u>78</u> | <u>AC106874.1</u> | <u>1.11x10<sup>0</sup></u>  | <u>3.60x10<sup>-2</sup></u> |
| <u>79</u> | <u>AC099673.1</u> | <u>8.16x10<sup>-1</sup></u> | <u>3.62x10<sup>-2</sup></u> |

|            |                      |                             |                             |
|------------|----------------------|-----------------------------|-----------------------------|
| <u>80</u>  | <u>AC135012.3</u>    | <u>9.06x10<sup>-1</sup></u> | <u>3.76x10<sup>-2</sup></u> |
| <u>81</u>  | <u>AC010998.1</u>    | <u>9.13x10<sup>-1</sup></u> | <u>3.88x10<sup>-2</sup></u> |
| <u>82</u>  | <u>AC023421.1</u>    | <u>9.55x10<sup>-1</sup></u> | <u>3.89x10<sup>-2</sup></u> |
| <u>83</u>  | <u>AC104958.1</u>    | <u>9.11x10<sup>-1</sup></u> | <u>3.94x10<sup>-2</sup></u> |
| <u>84</u>  | <u>ALKBH3-AS1</u>    | <u>9.01x10<sup>-1</sup></u> | <u>3.95x10<sup>-2</sup></u> |
| <u>85</u>  | <u>AC090164.2</u>    | <u>1.12x10<sup>0</sup></u>  | <u>4.00x10<sup>-2</sup></u> |
| <u>86</u>  | <u>AC011473.3</u>    | <u>8.97x10<sup>-1</sup></u> | <u>4.06x10<sup>-2</sup></u> |
| <u>87</u>  | <u>AP002892.2</u>    | <u>7.79x10<sup>-1</sup></u> | <u>4.14x10<sup>-2</sup></u> |
| <u>88</u>  | <u>LINC02016</u>     | <u>9.08x10<sup>-1</sup></u> | <u>4.31x10<sup>-2</sup></u> |
| <u>89</u>  | <u>LINC00518</u>     | <u>1.10x10<sup>0</sup></u>  | <u>4.31x10<sup>-2</sup></u> |
| <u>90</u>  | <u>AL353746.1</u>    | <u>1.09x10<sup>0</sup></u>  | <u>4.31x10<sup>-2</sup></u> |
| <u>91</u>  | <u>FGF12-AS1</u>     | <u>1.10x10<sup>0</sup></u>  | <u>4.42x10<sup>-2</sup></u> |
| <u>92</u>  | <u>LINC01323</u>     | <u>1.17x10<sup>0</sup></u>  | <u>4.44x10<sup>-2</sup></u> |
| <u>93</u>  | <u>AC109830.1</u>    | <u>8.47x10<sup>-1</sup></u> | <u>4.45x10<sup>-2</sup></u> |
| <u>94</u>  | <u>AL031058.1</u>    | <u>1.13x10<sup>0</sup></u>  | <u>4.50x10<sup>-2</sup></u> |
| <u>95</u>  | <u>PRR7-AS1</u>      | <u>1.08x10<sup>0</sup></u>  | <u>4.50x10<sup>-2</sup></u> |
| <u>96</u>  | <u>DRAIC</u>         | <u>9.64x10<sup>-1</sup></u> | <u>4.50x10<sup>-2</sup></u> |
| <u>97</u>  | <u>AP003064.2</u>    | <u>9.19x10<sup>-1</sup></u> | <u>4.52x10<sup>-2</sup></u> |
| <u>98</u>  | <u>LINC02036</u>     | <u>9.52x10<sup>-1</sup></u> | <u>4.61x10<sup>-2</sup></u> |
| <u>99</u>  | <u>AC112722.1</u>    | <u>9.33x10<sup>-1</sup></u> | <u>4.63x10<sup>-2</sup></u> |
| <u>100</u> | <u>AL391863.2</u>    | <u>7.44x10<sup>-1</sup></u> | <u>4.69x10<sup>-2</sup></u> |
| <u>101</u> | <u>AL645608.5</u>    | <u>8.12x10<sup>-1</sup></u> | <u>4.71x10<sup>-2</sup></u> |
| <u>102</u> | <u>LINC00473</u>     | <u>1.04x10<sup>0</sup></u>  | <u>4.71x10<sup>-2</sup></u> |
| <u>103</u> | <u>AP000542.2</u>    | <u>1.09x10<sup>0</sup></u>  | <u>4.73x10<sup>-2</sup></u> |
| <u>104</u> | <u>AC090541.1</u>    | <u>1.08x10<sup>0</sup></u>  | <u>4.80x10<sup>-2</sup></u> |
| <u>105</u> | <u>AP003469.2</u>    | <u>1.09x10<sup>0</sup></u>  | <u>4.81x10<sup>-2</sup></u> |
| <u>106</u> | <u>Z95114.1</u>      | <u>1.06x10<sup>0</sup></u>  | <u>4.86x10<sup>-2</sup></u> |
| <u>107</u> | <u>CTD-2350J17.1</u> | <u>1.05x10<sup>0</sup></u>  | <u>4.87x10<sup>-2</sup></u> |

lncRNA, long non-coding RNA; HR, hazard ratio.
